# Supplementary material for: Landscape of immune-related signatures induced by targeting of different epigenetic regulators in melanoma: implications for immunotherapy
Source: PubMed Central journal article supplement (PMC9670381; doi:10.1186/s13046-022-02529-5), 2022-11-17
Supplement: 13046_2022_2529_MOESM1_ESM.pdf [file 13046_2022_2529_MOESM1_ESM.pdf]

1 **Supplementary Methods**

2 **Landscape of immune-related signatures induced by targeting of**  
3 **different epigenetic regulators in melanoma: implications for immunotherapy.**  
4

5 Andrea Anichini<sup>1</sup>, Alessandra Molla<sup>1</sup>, Gabriella Nicolini<sup>1</sup>, Valentina E. Perotti<sup>1</sup>, Francesco  
6 Sgambelluri<sup>1</sup>, Alessia Covre<sup>2,3</sup>, Carolina Fazio<sup>2</sup>, Maria Fortunata Lofiego<sup>2</sup>, Anna Maria di Giacomo<sup>2,3</sup>,  
7 Sandra Coral<sup>2</sup>, Antonella Manca<sup>4</sup>, Maria Cristina Sini<sup>4</sup>, Marina Pisano<sup>4</sup>, Teresa Noviello<sup>5,6</sup>,  
8 Francesca Caruso<sup>5,6</sup>, Silvia Brich<sup>7</sup>, Giancarlo Pruneri<sup>7,8</sup>, Andrea Maurichi<sup>9</sup>, Mario Santinami<sup>9</sup>,  
9 Michele Ceccarelli<sup>5,6</sup>, Giuseppe Palmieri<sup>4,10</sup>, Michele Maio<sup>2,3\*</sup>, Roberta Mortarini<sup>1\*</sup>

10  
11 On behalf of the **EPigenetic Immune-oncology Consortium AIRC (EPICA)** investigators.

12  
13 <sup>1</sup>Human Tumors Immunobiology Unit, Dept. of Research, <sup>7</sup>Department of Pathology and  
14 Laboratory Medicine, <sup>9</sup>Melanoma and Sarcoma Unit, Department of Surgery, Fondazione IRCCS  
15 Istituto Nazionale dei Tumori, Milan, Italy. <sup>2</sup>Center for Immuno-Oncology, University Hospital of  
16 Siena, Siena, Italy. <sup>3</sup>University of Siena, Siena, Italy. <sup>4</sup>Unit of Cancer Genetics, National Research  
17 Council (CNR), Sassari, Italy. <sup>10</sup>University of Sassari, Sassari, Italy. <sup>5</sup>Department of Electrical  
18 Engineering and Information Technology (DIETI), University of Naples "Federico II", Naples, Italy.  
19 <sup>6</sup>BIOGEM Institute of Molecular Biology and Genetics, Ariano Irpino, Italy. <sup>8</sup>University of Milan,  
20 School of Medicine, Italy.

21 \*These authors contributed equally.

22  
23 **Correspondence:** Andrea Anichini, PhD, Human Tumors Immunobiology Unit, Dept. of Research,  
24 Fondazione IRCCS Istituto Nazionale dei Tumori, Via Venezian 1, 20133 Milan, Italy.  
25 Phone+390223902817. e-mail: [andrea.anichini@istitutotumori.mi.it](mailto:andrea.anichini@istitutotumori.mi.it).

26  
27  
28 **Supplementary Methods.**

29 **NGS analysis.** DNA was extracted from 0.5-1x10<sup>6</sup> melanoma cell lines using the Purelink Genomic  
30 DNA Mini Kit (Invitrogen). RNase treatment was performed using RNase cocktail (Invitrogen).  
31 Quantitative assessment of DNA was performed using a Nanodrop 2000 spectrophotometer and  
32 DNA integrity was confirmed by gel electrophoresis. NGS assays on melanoma cell lines DNA were  
33 performed using Ion GeneStudio S5 System and carried out on Ion AmpliSeq™ Comprehensive  
34 Cancer Panel, which provides highly multiplexed target selection of 409 genes implicated in cancer  
35 pathogenesis. Starting DNA and libraries were accurately quantified using a fluorescence-based  
36 method, such as Qubit dsDNA HS. Data analysis workflow was performed by automated data

37 transfer, from the Ion Torrent™ Server to the Ion Reporter Server for variant analysis; it includes  
38 result filtering, annotation, and data analysis results. To get a total amount of at least 10 mutated  
39 alleles for each candidate amplicon, the following mutation selection criteria were adopted:  
40 coverage of >200 reads and frequency of mutated alleles >5% for gene amplicon. The copy  
41 number variation (CNV) determination was obtained by adding a custom control copy number  
42 baseline to the comprehensive cancer profile analysis workflow. Results of NGS analysis of 14  
43 melanoma cell lines used in this study are shown in Supplementary Table S1D.

44 **Gene expression analysis.** The total RNA (20 ng to 50 ng) was reverse transcribed using  
45 GeneChip® WT Pico Reagent Kit (Affymetrix; Thermo Fisher Scientific, Inc.). The resulting cDNA  
46 was used as a template for in vitro transcription using the same kit. The obtained antisense cRNA  
47 was purified using Nucleic Acid Binding Beads (GeneChip® WT Pico Reagent Kit, Affymetrix) and  
48 used as a template for reverse transcription to produce single-stranded DNA in the sense  
49 orientation. During this step, dUTP was incorporated. The DNA was then fragmented using uracyl  
50 DNA glycosylase (UDG) and apurinic/aprimidinic endonuclease 1 (APE 1) and labeled with DNA  
51 reagent covalently linked to biotin using terminal deoxynucleotidyl transferase (TdT, GeneChip®  
52 WT Pico Reagent Kit, Affymetrix). Hybridization of each fragmented and labeled target was  
53 performed using the GeneChip® Hybridization, Wash and Stain Kit (Affymetrix; Thermo Fisher  
54 Scientific, Inc). A single GeneChip® Human Clariom S was then hybridized with each biotin-labeled  
55 sense target. GeneChip arrays were scanned using an Affymetrix GeneChip® Scanner 3000 7G  
56 using default parameters. Affymetrix GeneChip® Command Console software (AGCC) was used to  
57 acquire GeneChip® images and generate .DAT and .CEL files. Gene expression data were analyzed  
58 by Transcriptomic Analysis Console (TAC) software (Applied Biosystems, Thermo Fisher Scientific).  
59 Modulation of immune-related genes by epigenetic drugs in ten melanoma cells was assessed by  
60 the NanoString nCounter PanCancer Immune profiling panel enabling determination of 731 genes

61 (NanoString Technologies, Seattle, USA). The manufacturer's gene classification associated with  
62 the PanCancer Immune profiling panel was revised by retrieving information on gene function at  
63 <http://genecards.org> and then by grouping genes into 21 functional classes. For NanoString  
64 experiments panel probes (capture and report) and 200 ng of RNA were hybridized overnight at 65  
65 °C for 16 h. Samples were scanned at maximum scan resolution capabilities (555 FOV) using the  
66 nCounter Digital Analyzer. Quality control of samples, data normalization and data analysis were  
67 performed using nSolver software 4.0 (NanoString Technologies).

68 Whole gene expression profile of treated and untreated mesothelioma cell lines was  
69 performed by Agilent whole human genome oligo microarray kits. The quantity and the quality of  
70 RNA, extracted as previous described, was assessed with NanoDrop® ND-1000 UV-Vis  
71 Spectrophotometer (NanoDrop Technologies, Wilmington, DE, USA) and the Agilent 2100  
72 Bioanalyzer (Agilent Technologies, Santa Clara, CA, USA). *In vitro* transcription, labeling and  
73 purification of dye-labeled cRNA were performed using the Quick Amp Labeling Kit, one-color  
74 (Agilent Technologies, Santa Clara, CA, USA) following manufacturer's guidelines. Gene expression  
75 profiling was performed by a One-Color strategy using Cy3-labeled aRNA from guadecitabine-  
76 treated and untreated cells (Quick Amp Labeling, Agilent Technologies, Santa Clara, CA, USA). A  
77 mixture of 1650 ng of Cy3-labeled reference cRNA, Blocking Agent and Fragmentation Agent was  
78 hybridized to Whole Human Genome (1x44K) oligo microarray platform (Agilent Technologies,  
79 Santa Clara, CA, USA). Hybridization was performed for 17 hours at 65°C in 2x GEx Hybridation  
80 Buffer HI-RPM (Agilent Technologies, Santa Clara, CA, USA), using Agilent's Hybridization Oven at  
81 10 rpm. Following washing, slides were analyzed by Agilent Microarray Scanner. Feature  
82 Extraction Software provided by Agilent (version 9.5.3) was used to quantify the intensity of  
83 fluorescence images and to normalize results by subtracting local background fluorescence

84 according to the manufacturer's instruction. Genes modulated with a  $FC \geq 2$  or  $\leq -2$  in treated vs  
 85 untreated cells were used for upstream regulator analyses.

86 **Quantitative Real-Time Methylation Specific PCR (qMSP) Analysis.** Genomic DNA was extracted  
 87 from 9 melanoma cell lines untreated and treated with 1  $\mu$ M of guadecitabine, using QIAmp DNA  
 88 Blood mini-Kit (Qiagen, Hilden, Germany), and modified (500 ng) with sodium bisulfite using the EZ  
 89 DNA Methylation-Gold Kit (Zymo Research, CA, United States). SYBR green qMSP reactions were  
 90 performed with methylated- or unmethylated-specific primer pairs on 2  $\mu$ l of bisulfite-modified  
 91 genomic DNA. Primers for the analysis of the methylation status of LINE-1, MAGE-A1 and NY-ESO-  
 92 1 were designed using the free on-line software MethPrimer, and are reported in the following  
 93 table.

|         |                    | <i>Forward</i>            | <i>Reverse</i>             |
|---------|--------------------|---------------------------|----------------------------|
| LINE-1  | <i>Unmetilated</i> | TGTGTGTGAGTTGAAGTAGGGT    | ACCCAATTTTCCAAATACAACCATCA |
|         | <i>Methylated</i>  | CGCGAGTCGAAGTAGGGC        | ACCCGATTTTCCAAATACGACCG    |
|         |                    |                           |                            |
| MAGE-A1 | <i>Unmetilated</i> | GTTAGGTTTTTTGGTTGAATTTTAT | CCCAAATATAACACCACTAACTTACA |
|         | <i>Methylated</i>  | TAGGTTTTTTTCGGTCGAATTTTAC | CGAATATAACGCGACTAACTTACG   |
|         |                    |                           |                            |
| NY-ESO1 | <i>Unmetilated</i> | CTACACACAAAAACCTACTTCCA   | TGGTATTGTGGTTATTTTTGGTTT   |
|         | <i>Methylated</i>  | GCACAAAAACCTACTTCCG       | TTGCGGTTATTTTTCGGTTT       |

94 The copy number of methylated or unmethylated sequences for LINE-1, MAGE-A1 and NY-ESO-1  
 95 genes was established by extrapolation from the standard curves. The percentage (%) of  
 96 methylation was defined as ratio between methylated molecules and the sum of methylated and  
 97 unmethylated molecules and data were reported as % of LINE-1, MAGE-A1 and NY-ESO-1  
 98 methylation in treated and untreated cells.

99 **Quantitative western blot analysis.** Primary antibodies were diluted in milk 5% or BSA 5%  
 100 in TBST and incubated overnight. Development was performed with the ECL normal western blot  
 101 detection system by the chemiluminescence method. Images were acquired with the Alliance

102 Imaging System (Uvitec). Densitometric analysis was carried out by Quantity One software (Bio-  
103 Rad Laboratories Inc.). Normalized treated/control ratios were computed on the basis of  
104 background-adjusted density values and then visualized by a color code.

105 **Data Analysis.** The Transcriptomics Analysis Console (TAC) software (Applied Biosystems)  
106 was used to identify significantly modulated genes by treatment of two melanoma cell lines  
107 (VRG100 and CST30) with guadecitabine, givinostat, JQ1, OTX-015, GSK126 or abemaciclib, and of  
108 melanoma nodules removed from immunodeficient mice treated with Guadecitabine. Analysis  
109 settings were as follows: gene level fold change  $>|1.2|$ , gene-level p value:  $<0.05$ ; gene-level FDR:  
110  $<0.05$ . Ingenuity Pathway Analysis (IPA 8.5, [www.ingenuity.com](http://www.ingenuity.com)) was used to carry out Upstream  
111 Regulator (UR) analysis on: a) significantly modulated genes by different treatments; b)  
112 differentially expressed genes in pre-therapy and on-treatment lesions from responding vs non  
113 responding patients from the NIBIT-M4 trial (ref. 24 in the manuscript). Upstream regulator  
114 analysis allows to identify upstream transcriptional regulators that can explain the observed gene  
115 expression changes in the dataset. This computational tool returns results based on p-values and Z  
116 score statistics. P values indicate the likelihood of the association between a set of genes and  
117 related function, or the likelihood of the overlap between the genes in the dataset and those that  
118 are regulated by a predicted upstream regulator. The meaning of the Z score statistics is to infer  
119 the activation states (“increased” or “decreased”) of the identified biological functions and of the  
120 predicted transcription factors. Only Z scores greater than 2 or smaller than -2 were considered  
121 significant. IPA was also used for canonical pathway analysis. Canonical pathway analysis is a  
122 computational tool allowing to determine if canonical pathways are activated or inhibited on the  
123 basis of gene expression in the dataset. Activation or inhibition states of canonical pathways are  
124 predicted based on the Z-score algorithm. The significance values (p-value of overlap)

125 are calculated by the right-tailed Fisher's Exact Test and indicate the probability of association of  
126 molecules in the dataset with the canonical pathway by random chance alone.
