# Supplementary material for: Landscape of immune-related signatures induced by targeting of different epigenetic regulators in melanoma: implications for immunotherapy
Source: J Exp Clin Cancer Res. 2022 Nov 17;41:325. doi: 10.1186/s13046-022-02529-5 (PMC9670381; doi:10.1186/s13046-022-02529-5)
Supplement: Supplementary file 6 — Additional file 6: Supplementary Table S4. Modulation of immune-related genes belonging to 21 functional classes by epigenetic drugs. Sheets # to #21. [file 13046_2022_2529_MOESM6_ESM.xlsx]

## Sheet: 1-Cancer testis genes
		Supplementary Table S4. Sheet #1. Modulation of immune-related genes belonging to 21 functional classes by epigenetic drugs. Ten melanoma cell lines were treated with the indicated drugs and then gene modulation was evaluated by the Nanostring Cancer immune panel. The 731 genes were grouped into the indicated functional classes (sheets 1 to 21 of this file). Extent of modulation is shown as Log2(…
		1-CANCER TESTIS GENES
		GUADECITABINE											GIVINOSTAT											JQ1											GSK-126											ABEMACICLIB
	Gene symbol	VRG100	BRM17	FRN39	CST30	BNV13	MNT59	GRD43	GML41	CPN20	SLN91		VRG100	BRM17	FRN39	CST30	BNV13	MNT59	GRD43	GML41	CPN20	SLN91		VRG100	BRM17	FRN39	CST30	BNV13	MNT59	GRD43	GML41	CPN20	SLN91		VRG100	BRM17	FRN39	CST30	BNV13	MNT59	GRD43	GML41	CPN20	SLN91		VRG100	BRM17	CST30	MNT59
	SSX1	2.79664	2.67065	3.03202	1.61567	3.02189	5.68583	3.93233	2.12782	5.65234	4.03379		-1.32301	0.308018	-0.0175443	-1.33934	0.198851	-0.0676586	0.191891	0.289835	-0.45707	-0.107448		-0.262867	0.126167	-0.139762	-1.36725	1.88858	0.0633696	0.175891	0.0504309	-0.485508	-1.31641		0.88878	1.2188	1.583	-1.41556	2.2895	-0.047856	0.11493	-0.14842	-0.524729	0.689118		-1.11125	0.605068	-1.26	0.664709
	MAGEB2	2.26414	1.53887	3.91428	-0.0194181	2.71668	4.2417	3.88684	0.180884	5.17709	0.663998		-0.0727594	-0.14436	-0.0175443	0.046957	0.198851	1.07816	0.191891	0.289835	-0.45707	0.333492		-0.131028	-1.27469	-0.139762	0.0190482	0.0198026	1.31425	0.175891	0.0504309	-0.485508	0.410951		0.0595921	-0.516293	-0.139762	0.885038	0	-1.42926	0.11493	-0.14842	-0.524729	0.0827192		0.138999	-0.343753	0.126294	0.531178
	SSX4	1.51763	2.8257	1.239	-0.0194181	0.076961	3.80687	2.0714	1.79176	4.70948	4.22404		-0.0727594	0.0531098	-0.0175443	0.046957	0.198851	-0.0676586	0.191891	0.289835	-0.45707	-0.398776		-0.131028	-0.0953102	-0.139762	0.0190482	0.0198026	0.0633696	0.175891	0.0504309	-0.485508	-0.398776		0.0595921	0.119801	-0.139762	-0.0292704	0	-0.047856	0.11493	-0.14842	-0.524729	1.50184		0.138999	-0.0953102	0.126294	-0.0284379
	CTCFL	1.83085	-0.310094	4.35369	1.22293	0.081256	5.17404	1.794	2.59204	3.49901	1.31212		-0.775739	-2.55227	1.08107	1.13242	0.458097	1.93382	0.493616	1.7609	2.02394	-0.0712001		-3.52058	-1.86344	1.46968	-1.95261	-1.92181	0.0633696	-0.334294	1.34765	-0.485508	-2.84316		0.029341	-2.48558	-0.139762	0.133632	0.125248	1.5655	-2.18701	-1.28594	0.722304	0.643906		-3.67582	-2.37139	-0.0861857	1.91747
	CT45A1	2.2131	0.733262	3.51051	2.86257	1.30529	4.10063	2.08805	-1.9551	3.70269	0.632903		0.363531	0.411648	-0.935573	2.4897	-1.40658	0.667313	-2.00462	-1.44093	3.06571	-0.232782		0.991769	0.755357	1.8856	1.48611	-0.673266	0.929706	-0.634327	-0.0333996	3.40808	-0.311097		-0.255667	0.46388	1.35812	1.22019	0.461433	0.33452	-2.08158	-0.567008	2.89201	0.123586		-1.56255	0.629538	1.42865	0.840191
	CTAG1B	0.244345	2.99734	2.84781	0.908565	1.1811	6.22339	2.10103	0.180884	1.23885	-0.288662		0.816573	-1.45299	-0.935573	1.06168	-0.486555	-0.0676586	-1.41626	0.289835	0.394503	0.0241423		0.63597	0.334454	-1.05779	-1.00429	-1.76694	0.0633696	-1.43226	0.0504309	-1.01456	-0.296786		-0.16356	-0.466783	-1.05779	0.264979	1.29103	-0.047856	-1.49323	-0.14842	-1.19497	-0.0453042		-0.369472	-1.2721	-0.489029	-0.0284379
	MAGEC2	0.610549	1.09253	3.63804	0.0219625	3.636	1.67965	1.44199	2.89466	0.996314	0.0850812		0.335746	1.84343	0.675603	0.0137725	2.74504	1.33121	-0.120047	0.366099	0.955818	0.0412524		-0.049774	1.08026	-0.139762	-0.0181795	1.17272	0.127817	-0.411074	-0.0285548	0.239611	0.0309821		0.36915	2.26271	0.486176	0.0329972	2.25883	0.295623	-0.232066	-0.350388	0.37811	0.136116		-0.085823	1.33261	0.0579583	1.21184
	DDX43	0.164938	4.05305	1.02234	0.0560647	1.17557	3.53251	0.728767	1.28189	-0.132784	1.487		-0.0671835	0.0531098	0.0609173	-0.106034	0.198851	-2.01357	-0.0239955	0.289835	-0.415518	-1.78675		-0.10367	-0.0953102	0.244251	0.680258	0.0198026	-0.498442	-1.16701	2.3979	0.288603	-1.63833		0.00681187	0.119801	0.375475	-0.0462729	1.08519	-0.380414	0.00222903	-0.14842	-0.142964	-1.78675		0.0342478	-0.0953102	-0.055805	-0.588054
	MAGEC1	0.00873368	-1.51523	0.785729	2.05052	3.21286	1.54521	1.25415	1.94071	2.57196	0.326505		0.332706	-1.45299	-0.338367	-0.913183	0.896088	1.78308	0.229707	0.858803	3.18595	0.441485		0.294239	-1.60141	-1.84688	1.01607	0.425268	0.785022	-0.710564	0.531224	1.87147	0.139956		1.1582	-1.38629	-1.22094	-0.33976	0	0.389362	-0.684411	-2.82078	1.21488	-0.0351203		0.138999	0.76603	0.00508045	0.790904
	MAGEA1	0.00873368	-0.00913248	1.46366	2.8439	-1.01831	3.72828	1.60867	0.180884	0.758979	1.29974		-0.0727594	0.0531098	-0.0175443	3.20415	-0.896423	-0.0676586	0.724735	0.289835	-0.45707	1.15558		2.24108	-0.0953102	-0.139762	4.04541	-0.670006	0.0633696	-1.43226	1.55086	-0.485508	0.402669		0.0595921	0.119801	1.17665	2.88502	1.08853	-0.047856	-1.49323	-0.14842	-0.524729	0.555059		0.138999	-0.0953102	1.92087	1.07017
	PASD1	0.930228	-0.00913248	1.239	-0.0194181	0.076961	3.23776	2.32289	1.56838	-0.524729	1.5063		-0.0727594	0.0531098	-0.0175443	1.75254	0.198851	-0.0676586	0.191891	-0.11563	-0.45707	0		-0.131028	-0.0953102	-0.139762	0.712195	0.0198026	0.0633696	0.175891	1.89193	-0.485508	0		0.0595921	0.119801	-0.139762	-0.0292704	0	-0.047856	0.11493	-0.553885	-0.524729	0		0.138999	0.233994	0.126294	0.664709
	MAGEA3	0.214368	2.12699	3.98877	-0.0224013	0.386541	0.0637874	0.240386	2.65254	-0.10291	0.0764337		0.287281	0.682417	-0.425904	-0.0647828	0.466106	-0.0656707	0.190204	0.971243	0.0763333	-0.0431508		0.311923	0.357742	-0.548121	-0.173204	0.203001	-0.06385	-0.154361	0.584376	-0.173513	-0.0626743		0.100347	0.505904	-0.548121	0.0696486	0.0341405	-0.0724687	0.197359	0.0889593	0.200773	0.0715589		0.0122321	-0.0616257	0.182329	-0.00370122
	MAGEA12	1.5038	0.346782	2.08449	2.72269	0.162726	0.102631	0.544789	0.567799	0.0460645	-0.102228		1.78038	-0.914565	-0.425904	0.046957	0.403051	0.114035	0.0151833	0.855302	0.153277	-0.00185663		1.99551	-1.61203	-0.548121	0.0190482	-0.0338433	0.227516	-0.110928	-0.29921	0.0305817	-0.277294		0.889696	-0.0912597	1.17465	0.372889	-0.0367577	-0.0369439	-0.06118	-0.00667729	0.075936	0.0182273		0.196962	-0.0818434	2.07583	0.147139
	TMEFF2	0.732448	2.39043	1.0553	-0.447732	-0.611174	-0.974793	1.56212	1.064	0.738385	0.856305		0.400612	1.99779	0.960391	0.715984	-0.489284	0.59737	2.09615	2.39579	1.6059	0.401804		0.828283	2.42882	1.06132	-0.201955	2.29906	-0.750275	0.647177	0.0663606	-1.70478	0.315015		0.350736	0.119801	1.78013	-2.33089	1.60137	-0.162488	0.64852	-0.337814	0.436519	-0.323644		0.509204	0.746257	-0.0927149	-0.146139
	PRAME	0.559593	0.116327	0.154307	-0.0475282	0.0945279	-0.153237	4.60305	-0.09104	-0.190266	-0.0397642		0.718381	0.160839	0.0632212	0.125121	0.0115614	0.0413522	0.191891	-0.0285861	0.0777612	0.220412		-2.13708	-1.02756	-0.0927363	-0.0475852	-0.243272	0.0752531	0.175891	-0.00425034	0.00815522	-0.0123568		0.178328	0.180987	-0.0480767	0.0429992	-0.0212317	0.0493888	0.11493	0.0260415	0.0906834	0.133715		0.114028	-0.32776	0.203092	0.0888172
	GAGE1	0.295174	-1.1325	0.106088	-0.125878	2.02287	0.912048	0.197881	0.698314	0.824254	-0.765829		-0.672922	-0.379036	-2.06776	-0.255414	0.198851	-0.347995	-0.36154	-0.345746	-0.570482	0.235031		-0.650919	-0.892741	0.483137	-0.62839	1.72098	2.14036	-0.346645	0.675408	-3.16027	-1.27149		-0.375829	0.208957	0.0918959	-0.335292	0	-2.75653	-3.18019	-1.63327	-0.939812	-0.2666		0.262539	-0.323316	-0.0706496	0.559082
	SPACA3	0.00873368	-0.00913248	-1.05779	0.122158	0.774116	1.62796	0.349674	0.394603	-0.524729	0.65752		-0.0727594	0.0531098	-0.935573	0.48647	-0.709342	-0.0676586	0.365378	-1.26704	-0.45707	0.955511		-0.131028	-0.0953102	-1.05779	-2.28257	-0.335669	0.0633696	0.736308	-0.454517	0.207639	0		0.0595921	0.119801	-1.05779	-0.462907	0.172907	-0.047856	-0.09059	-0.614845	-0.524729	0		0.138999	0.746257	0.0247161	-0.0284379
	PNMA1	0.0118669	0.282491	0.406847	0.204277	-0.0223524	0.474998	0.210761	0.0565862	0.75502	-0.0392483		-0.107377	0.0708942	0.0488774	-0.0893478	0.116035	-0.0132715	-0.0981351	-0.0948433	0.590567	-0.0224083		0.559608	0.714032	0.76767	0.514156	0.397593	0.893529	0.799247	0.82367	1.52113	0.449615		0.0119216	-0.0945343	0.0307086	0.105955	-0.0707506	-0.0355795	-0.0631747	-0.0576004	0.469154	-0.0738904		0.174767	0.115792	0.212011	0.132964
	ROPN1	-0.730888	-0.140315	-0.24758	0.366429	-0.0363676	1.06051	-1.05137	0.180884	-0.770604	2.92745		-1.07121	0.207363	-1.68948	0.388689	0.649228	0.560417	-1.11855	0.289835	-0.497894	3.01798		-1.26113	0.0415824	-0.201289	-0.554667	-0.160682	1.44791	-2.38807	0.0504309	-0.914084	2.09802		-2.18893	-0.0974797	0.00782528	0.0572586	0.0967296	0.543193	-2.44903	1.31252	-1.05716	1.08856		-1.7066	0.0835408	0.0657404	0.153884
	TPTE	-0.400913	-0.00913248	-0.266486	-0.000303086	-0.374633	-0.00697927	0.686307	0.279446	1.45049	0.0148863		0.403116	0.0531098	-0.225395	-0.0780969	0.138334	-0.0540758	-1.88675	0.3876	1.71969	0.0256611		-2.52697	1.96648	-0.666513	0.275583	-0.222641	-0.158923	-0.804137	-0.127793	-0.637303	-0.0864562		0.350635	0.119801	0.0190967	0.0790235	0.145888	0.0921103	-1.96371	-0.180803	-0.531304	0.184026		0.389347	0.746257	0.148848	0.145353
	CTAGE1	0.00873368	1.37945	-0.139762	-0.0194181	1.46326	-0.760806	-0.566853	0.180884	-0.524729	0.254642		-0.0727594	0.0531098	-0.0175443	0.046957	0.198851	-0.760806	-0.501256	1.54536	-0.45707	0		-0.131028	1.84055	-0.139762	0.0190482	1.5217	-0.629778	-0.517257	1.91844	-0.485508	0		0.0595921	0.119801	-0.139762	-0.0292704	1.59737	-0.741003	-0.578217	-0.14842	-0.524729	0		0.138999	-0.0953102	0.126294	-0.721585
	SPA17	0.149484	0.121886	0.193177	-0.0397541	0.230912	-0.123411	-0.113805	-0.0446536	0.492128	0.0349938		0.472439	0.524649	-0.020161	0.0614397	0.2075	0.000598173	-0.0283649	-0.120731	0.320605	-0.191083		0.11942	-0.487092	0.339723	-0.132266	-0.51906	-0.180821	-0.847111	-0.310653	-0.0905526	-0.781323		-0.0181776	0.217618	0.161984	-0.0786108	0.0476771	0.0923421	0.591551	-0.034389	0.103102	0.110746		-0.376928	0.316214	-0.265631	-0.520276
	MAGEA4	0.00873368	1.60214	-0.139762	-0.0194181	0.076961	-0.0676586	0.126294	0.180884	-0.524729	-0.588744		-0.0727594	0.0531098	-0.0175443	0.046957	0.198851	-0.0676586	0.191891	0.289835	-0.45707	-0.392157		-0.131028	-0.0953102	-0.139762	0.0190482	0.0198026	0.0633696	0.175891	0.0504309	-0.485508	-1.68391		0.0595921	2.26271	-0.139762	-0.0292704	0	-0.047856	0.11493	-0.14842	-0.524729	-1.03288		0.138999	1.08334	0.126294	-0.0284379
	SYCP1	0.971543	-0.589821	-0.889786	0.386773	1.37958	-0.474747	-0.972594	1.08435	-0.387879	-0.147475		0.654865	0.3574	0.0261026	-1.23214	0.716289	-0.649291	0.159756	1.39258	-0.780745	0.183109		0.42407	0.21586	-0.703114	-2.17818	1.06229	-0.45003	-2.5313	1.0384	0.00856536	-1.0892		-0.00588583	0.0370413	0.327578	-2.22649	1.53084	-0.961507	-2.59227	0.379909	0.270602	-0.6402		-0.957626	0.163643	-0.680408	-0.339216
	BAGE	2.53828	-1.26449	-0.525979	0.264951	-1.99747	0.346428	-0.333035	0.424984	0.826573	0		1.94089	-0.5091	-1.27431	0.139295	-1.87558	-0.0413085	0.0522887	1.43244	0.483427	1.57485		1.90498	1.80931	-0.702612	0.196221	1.59323	1.40442	-0.282967	1.04025	0.460243	0.14842		2.13903	-0.730091	-1.46304	0.127315	-0.296093	0.303126	-2.82883	-1.74125	-1.77834	0		1.64223	0.82522	0.482686	0.124934
	SPANXB1	1.71743	-0.00913248	-0.139762	1.23334	-0.611174	-0.317787	-0.97125	0.180884	-1.77834	0		1.1773	0.0531098	-0.0175443	0.046957	-1.18243	0.669288	0.311722	0.289835	-1.02221	1.20896		1.21184	-0.0953102	-0.139762	0.0190482	0.140417	0.0123786	-2.30795	0.0504309	-1.73912	1.45161		0.0595921	0.119801	-0.139762	-0.0292704	0.397055	-0.0445731	-1.96154	-0.14842	-1.77834	0		0.138999	-0.0953102	0.126294	-0.588499
	SEMG1	0.00873368	-0.470004	-0.139762	-0.487314	0.076961	-0.0676586	-0.566853	0.180884	-0.524729	0.65752		-0.0727594	-2.20105	-0.0175443	-0.731566	0.198851	1.62428	1.20397	0.289835	-0.45707	0		-0.131028	-1.1739	-0.139762	-1.36644	1.26976	0.0633696	-0.517257	3.01706	-0.485508	0		0.0595921	0.219319	1.86979	-1.26486	0	-0.047856	-0.578217	-0.14842	-0.524729	0		0.138999	-2.02016	0.0431609	0.664709
	SPO11	0.00873368	-0.00913248	-0.139762	-0.0194181	-2.22061	-0.0676586	0.126294	0.180884	-0.524729	0.254642		-0.0727594	0.0531098	-0.0175443	0.046957	-2.09872	-0.0676586	0.191891	0.289835	-0.45707	0		-0.131028	-0.0953102	-0.139762	0.0190482	-2.27777	1.67105	0.175891	0.963438	-0.485508	0		0.0595921	0.119801	-0.139762	-0.0292704	-0.23071	-0.047856	0.11493	-0.14842	-0.524729	0		0.138999	-0.0953102	0.126294	0.664709
	TTK	0.216992	0.083534	-1.07913	-0.148281	-0.38714	-0.575708	-0.370556	-0.185315	-0.104593	-0.153184		-0.01949	0.118729	-0.124692	-0.493342	-1.98585	-0.077229	-0.892648	-2.14114	-0.626783	-0.355349		-0.304111	-0.520438	-0.0733264	0.957082	-2.76259	-0.221503	-0.849599	-0.462604	-1.14441	-0.290553		-0.0181591	-0.0849216	-0.0716965	0.0330492	0.189793	-0.0715332	1.02186	0.111141	0.121634	0.182189		-0.986943	0.272667	-1.72196	-1.19676
	PBK	0.153298	0.104593	-0.950041	0.0130969	-0.261413	-0.651239	-0.677162	-0.34736	-0.290165	-0.150807		-0.0242774	0.0124879	-0.127624	-0.498746	-2.09687	-0.0213575	-1.32953	-2.3579	-0.784649	-0.426796		-0.42549	-0.765443	-0.624095	0.448182	-2.94145	-0.317202	-1.25721	-0.990311	-1.85978	-0.674484		0.00234441	-0.0750261	-0.131967	-0.014843	0.18674	-0.0568876	1.28246	0.0397141	0.0533519	0.181269		-1.7526	0.387271	-3.12907	-1.93637
	PRM1	0.00873368	1.73308	-1.64673	-1.40571	-0.611174	-1.45395	0.126294	0.180884	-0.524729	-0.398776		-0.0727594	0.742431	0.0831504	-1.33934	-0.489284	-0.549735	0.599118	0.289835	-0.45707	-0.285447		-0.131028	1.17346	-1.64673	-1.36725	-0.668332	0.467372	0.175891	0.450416	-0.485508	-0.398776		0.0595921	-0.216044	-0.105575	-1.41556	-0.688135	-1.43415	0.11493	-0.14842	-0.524729	-0.398776		0.138999	0.0772489	-1.26	-0.0284379
		Log2(Treated/Ctrl)
		-4															4
		-4	-3.5	-3	-2.5	-2	-1.5	-1	-0.5	0	0.5	1	1.5	2	2.5	3	3.5	4
[truncated: 3 more columns]

## Sheet: 2-Adhesion molecules
			Supplementary Table S4. Sheet #2. Modulation of immune-related genes belonging to 21 functional classes by epigenetic drugs. Ten melanoma cell lines were treated with the indicated drugs and then gene modulation was evaluated by the Nanostring Cancer immune panel. The 731 genes were grouped into the indicated functional classes (sheets 1 to 21 of this file). Extent of modulation is shown as Log2(…
			2-ADHESION MOLECULES
			GUADECITABINE											GIVINOSTAT											JQ1											GSK-126											ABEMACICLIB
		Gene symbol	VRG100	BRM17	FRN39	CST30	BNV13	MNT59	GRD43	GML41	CPN20	SLN91		VRG100	BRM17	FRN39	CST30	BNV13	MNT59	GRD43	GML41	CPN20	SLN91		VRG100	BRM17	FRN39	CST30	BNV13	MNT59	GRD43	GML41	CPN20	SLN91		VRG100	BRM17	FRN39	CST30	BNV13	MNT59	GRD43	GML41	CPN20	SLN91		VRG100	BRM17	CST30
		PECAM1	2.24	5.9327	2.38998	0.540198	1.01616	3.01471	1.89121	1.01183	5.33859	2.10593		-1.09451	2.13147	-1.52452	1.05939	-0.398639	1.7902	-0.107444	-0.960462	-0.173165	-0.398776		-1.94505	1.08026	-1.64673	1.96563	0.780539	2.25864	-1.09631	0.300562	-0.196882	2.3179		-0.3584	1.82748	-1.64673	-0.722418	0.589308	0.650181	-0.750441	-1.03407	0.317139	0		-0.241794	1.53393	1.63319
		ITGB4	1.58339	1.15462	2.23018	-0.0194181	1.46326	1.01499	2.76495	0.180884	3.35806	2.7325		0.525705	-0.388668	0.460487	0.046957	2.76758	-1.45395	1.89712	0.289835	2.05671	1.23538		-1.39979	-1.12691	-1.91727	0.0190482	3.36695	0.467372	0.175891	0.0504309	-2.50081	-2.00956		0.0922764	-0.264872	0.27429	-0.0292704	1.59737	-1.43415	0.11493	-0.14842	-2.54003	0.0909135		0.149852	-1.85637	0.126294
		SELPLG	-0.0274144	0.0573693	2.2428	-0.0194181	3.33541	3.68654	1.91711	0.180884	0.735428	0.673466		-0.46136	-0.0739458	1.22173	0.046957	2.14827	0.324383	0.191891	0.289835	0.562037	0.618571		-2.78883	-0.441317	0.88601	1.40534	2.61958	1.44747	0.175891	0.0504309	0.964958	-0.855451		-0.076176	-0.345709	0.908631	-0.0292704	2.87751	-0.047856	0.11493	1.82288	0.225916	-0.456694		0.42638	0.108603	1.92087
		ITGB2	1.71743	0.9871	1.73518	1.85389	0.076961	-0.0676586	1.7346	0.180884	1.45074	2.17847		1.42922	0.142125	-1.27155	0.046957	0.198851	-0.0676586	0.191891	0.289835	0.638422	-0.981945		-0.131028	-0.776707	-1.39377	0.0190482	0.0198026	0.0633696	0.175891	0.0504309	-0.485508	-1.09527		0.0595921	0.656498	-1.39377	-0.0292704	0	-0.047856	0.11493	-0.14842	-0.524729	-1.09527		0.138999	-0.662606	0.126294
		ITGB3	0.605403	0.632052	1.2048	0.0549521	-0.106471	3.60927	0.358062	1.25569	0.855499	3.02578		0.588048	0.282368	0.305145	0.336767	0.711688	1.66753	0.507271	2.77375	0.71796	0		0.0698855	-0.14084	0.550105	1.44	0.885197	1.85293	-0.355553	0.893576	0.551354	0		0.0406496	-0.00711532	0.199567	0.113073	0.00171147	0.872349	-0.346339	0.075375	-0.0116536	0		0.603064	-0.453508	0.152805
		ICAM2	1.14858	0.163352	2.38998	0.616615	-0.403921	2.42058	0.21769	0.204285	2.86844	1.39297		2.1138	0.499289	-0.425904	0.49771	-2.36147	-1.45395	-0.835755	-0.0421153	-0.45707	-0.185899		-0.85349	0.14444	1.39636	-0.0261366	-0.29233	0.467372	-0.159665	0.199388	1.12585	-0.658056		-0.579488	-0.123498	1.68511	0.0753565	0.0657935	0.648961	-1.6751	-0.232261	0.0291566	-0.806476		-0.857847	-1.07536	0.472951
		ITGA2B	2.93049	1.15153	-0.916794	2.72269	1.03719	-0.331742	0.637623	0.874031	1.45039	0.734683		2.89572	1.21155	-0.0959893	2.72142	-1.40658	0.215065	1.12673	2.16412	1.26117	1.79455		2.08709	-0.177983	-2.98997	1.96631	-1.58563	-1.80915	-2.30795	2.18663	1.64337	0.156698		2.25682	1.07416	0.0976619	1.67277	0.68407	0.162734	-0.0161729	2.48203	1.88499	1.4991		0.138999	1.43491	1.22773
		ITGAX	3.12469	-0.00913248	2.49285	0.135316	-0.0389535	1.26734	0.307897	1.23461	0.593641	1.17211		3.32143	1.4394	-0.0175443	0.760241	0.821602	0.970689	0.903363	4.29195	-0.162045	0.426257		0.302281	1.53	-0.139762	-1.62702	0.0372856	-2.33453	-0.834887	0.810656	-2.41094	-3.0032		-0.340008	0.119801	0.889857	-0.0208105	-0.0832736	-1.74771	-0.0181639	-1.03407	-0.075664	1.34423		0.991071	1.70144	-0.00271304
		THBS1	-1.71703	0.194886	2.23113	1.08445	0.108267	1.44553	0.194259	0.365953	2.7892	0.386426		-0.136509	0.346146	0.595494	1.2158	1.07728	0.063414	0.132062	1.81975	2.46	0.141385		-0.778511	-0.377837	0.258299	0.851443	-0.146572	0.427619	0.828535	0.283646	1.47181	-0.472343		0.0987754	0.215401	0.135292	-0.466773	0.121504	-0.269654	-0.251312	-0.953213	0.328727	-0.288307		1.00442	-0.862691	-0.435199
		EPCAM	0.206965	0.684015	0.115718	-0.894887	0.735884	1.12737	1.3051	-0.359464	2.35143	1.75608		-0.492822	0.0531098	0.312493	0.506972	1.38009	0.194706	-0.382084	-0.306616	-1.32706	0.575603		-1.67365	1.69811	-3.21004	-1.77271	-0.67174	-1.23884	-1.90275	0.225036	0.875624	-1.65441		0.0586919	1.37487	0.409492	0.52704	0.471259	0.553895	-0.710131	-2.52295	-0.516654	0.127298		-0.0913257	0.746257	0.129115
		ITGAM	1.88387	-0.00913248	2.05077	2.34246	0.945268	-1.16627	0.159392	0.482971	0.315839	0		-0.0727594	0.0531098	-0.0175443	0.848797	-0.449012	-0.262053	-2.80122	-2.77661	-1.37788	0		-0.131028	-0.0953102	-0.139762	-0.0744445	-0.0352242	0.909414	-2.12584	-3.01602	-0.7071	1.00063		0.0595921	0.119801	-0.139762	0.173093	0.0630954	-1.14647	-2.36798	-0.0198749	0.0293061	0		0.138999	0.746257	-1.16929
		ITGA1	0.215007	0.343133	1.84077	0.314725	0.0384526	2.18468	0.3717	0.337884	0.474738	0.747277		0.156956	-0.0161078	0.483545	1.10962	1.48123	0.663474	0.640144	1.59249	-0.00818254	0.818979		-1.39139	0.121287	0.885893	-0.428822	0.294973	-0.313441	0.0497066	0.0172272	-0.782146	-0.0067211		0.00982992	0.0251999	0.137276	-0.0158168	0.079391	0.036022	-0.164703	-0.00182104	-0.481451	-0.179837		-0.12998	-0.379598	-0.642975
		FN1	0.465146	0.179048	1.65133	0.429342	-0.229442	0.602288	0.183129	0.528192	1.32391	0.471695		0.0250675	0.335371	0.255412	0.828963	0.991316	1.05742	0.141657	1.64245	1.93757	0.741348		-0.774851	-0.981416	0.92834	-0.998603	-0.260709	-0.606837	-0.455851	-0.477566	-0.152259	-0.64014		-0.161021	0.222142	-0.0159182	-0.170143	-0.0686941	0.021027	-0.486123	-0.123143	0.110517	0.0602854		0.244257	-1.02917	-0.704397
		CLEC5A	0.00873368	-0.279691	2.68696	2.952	-0.29272	0.241663	-1.09786	1.28189	-0.494989	0.342399		-0.0727594	-0.866606	-0.0175443	0.046957	-2.56873	-1.45395	-1.38705	0.289835	0.365816	-0.27414		-0.131028	0.258833	2.90381	2.85337	0.925793	0.754321	-0.459344	2.48921	0.748222	1.05562		0.0595921	-0.224133	-0.139762	2.10671	-0.583775	-1.43415	-0.844409	-0.14842	-0.37577	-0.646307		0.138999	-1.98422	1.73912
		CDH1	-0.151673	1.93809	0.0424667	0.296354	-0.122596	-0.829863	0.522405	-0.141009	1.79896	1.43449		-0.0715091	0.0531098	0.0479264	0.114925	0.274775	0.0490204	0.605916	0.357927	2.17776	1.26305		-2.00013	-0.0953102	-3.56171	-2.03464	-2.41035	-1.80841	-2.29115	-1.78487	-0.601547	-5.3134		-1.80951	0.119801	0.132341	0.0168954	-0.0641792	0.195844	0.284158	0.00991753	0.0284993	0.783165		-1.32718	-0.0953102	-0.381686
		ITGA5	0.279128	0.780356	0.733738	0.154919	0.012025	1.42234	0.183147	0.749683	0.244621	0.0289379		0.296175	0.642529	0.0525888	0.472561	0.390729	0.318681	0.966417	0.997371	-0.325207	0.084125		-0.0639867	0.188794	-0.213144	-0.331429	0.129127	-1.07647	-0.341699	-0.567238	-0.853845	-1.98238		-0.145167	0.143598	0.220762	0.0355627	0.0836177	0.0774337	-0.583955	0.068715	-0.108685	0.070312		0.923061	-0.625596	-0.0797677
		SIGLEC1	1.62809	-0.414598	2.5616	-0.712565	0.076961	0.531178	-1.95235	0.180884	1.16217	1.5063		-0.472359	1.03394	-0.0175443	-0.64619	0.198851	-0.0676586	-1.88675	0.289835	-0.864505	0		-0.530628	-0.500775	-0.139762	0.937224	0.0198026	0.756517	-1.90275	0.0504309	-0.892943	0		-0.340008	1.73139	2.27615	-0.722418	1.37372	0.650181	-1.96371	-0.14842	-0.932164	0		-0.260601	0.340792	-0.566853
		ICAM4	0.966005	0.00674022	0.880753	-1.0203	-0.930084	1.0337	1.57415	0.180884	0.425318	1.08097		1.3061	-0.198998	-0.649047	-0.30864	1.65949	-2.84083	1.87611	3.91701	-1.11155	0.0372442		-2.80215	-1.5463	-0.213079	0.257071	1.50519	-0.408974	-1.2088	0.0504309	-1.53993	-1.19214		-0.126621	-1.01322	0.170694	0.121837	0.232777	-0.252316	-1.26976	-0.14842	-2.41396	-2.19277		0.580886	-1.11473	0.513004
		CD9	0.526479	-0.171281	0.315336	0.399924	0.384325	0.660872	0.537121	0.108533	0.0668036	0.841425		1.9862	-0.238358	0.0296027	0.506296	1.22634	0.162524	0.65958	0.434613	-0.177377	0.427471		-1.03173	-0.2062	0.0581165	-0.748582	0.492673	-0.0130486	-0.266286	0.108196	-0.507595	0.253119		-0.0721184	-0.0243314	-0.0495209	-0.0815518	-0.164303	-0.0935952	0.340563	-0.00754483	-0.504924	0.268102		0.769261	-0.116309	-0.781958
		ITGAL	0.930228	-0.414598	0.796769	-0.0194181	0.076961	-0.16472	0.126294	-1.31888	1.31741	1.95869		2.52853	-0.352355	-0.578402	0.046957	0.198851	-1.06191	-0.906721	-0.168218	1.33157	2.14593		1.90498	1.94678	-0.700619	0.0190482	0.0198026	-1.32292	0.463573	-0.111564	-0.485508	0		1.66903	-0.285664	-1.39377	-0.0292704	0.678034	-1.43415	0.522298	-2.74919	0.0291566	1.08856		0.138999	-0.171472	0.823669
		THY1	1.33163	1.13507	0.69614	0.65127	0.440359	-0.0901511	0.194796	0.140391	-2.13113	0.81768		4.69399	-0.5091	1.10761	0.446178	1.73421	-0.395814	0.791306	2.44095	-3.06042	0.268067		0.203431	-1.35067	-0.623692	-0.406124	0.477467	-2.5023	-1.01286	0.0818806	-3.08885	-0.909116		-0.255667	1.54137	0.778369	0.154426	0.0582068	-2.61352	0.141489	0.17729	-3.12808	-0.0557804		0.879461	-0.5091	-0.11981
		ICAM1	0.670539	1.22737	0.384515	0.119138	0.0728721	0.179282	0.0516349	0.220068	0.27384	-0.0357978		0.600259	0.682754	0.0213858	0.192973	0.96437	-0.0235124	0.719626	1.88834	-0.463937	0.0758206		-2.48695	1.55586	0.261148	0.00198418	1.34415	-0.356254	-0.477551	-1.16833	-1.30899	-0.701146		0.0996334	0.158531	-0.060056	-0.0792853	-0.0350204	0.0602447	-0.628775	-0.142499	-0.0935073	0.0381769		0.603506	-0.0957833	-0.0454734
		VCAM1	-0.278431	0.582323	0.952161	-0.0194181	0.076961	-0.0676586	-0.761062	0.180884	2.26213	0		-0.8939	1.10204	-0.0175443	0.046957	0.198851	-0.0676586	-0.499568	0.289835	-0.45707	0		-2.58781	0.838847	-0.139762	0.0190482	0.0198026	1.15905	-2.65657	0.0504309	-0.485508	0		0.279469	0.240405	0.486176	-0.0292704	2.38509	-0.047856	-2.71753	-0.14842	-0.524729	0		-2.77512	-1.03101	0.126294
		CEACAM8	-1.24152	-0.00913248	1.64531	0.540198	0.076961	-0.0676586	0.126294	0.0668152	-0.524729	2.12465		-0.072949	0.0531098	-0.0175443	-0.64619	0.198851	1.17072	0.191891	1.31624	-0.45707	1.20896		-1.38128	-0.0953102	0.553385	-0.674099	0.0198026	0.0633696	0.175891	1.70143	-0.485508	0		-1.19066	0.119801	-0.139762	-0.722418	0.678034	-0.047856	0.11493	-1.65058	-0.524729	0		-1.11125	-0.0953102	0.130522
		ALCAM	0.225416	-0.346672	0.240736	0.150783	-0.194108	0.532685	0.646724	0.115632	0.894754	-0.0195817		0.200805	0.107459	0.320092	0.5729	1.18139	0.802775	1.81299	1.31143	1.68731	0.263029		0.0845292	0.601472	0.660021	0.648866	0.667602	0.471906	0.887345	-0.0122784	1.0309	-0.152211		-0.10566	-0.06253	-0.0311746	-0.0971017	-0.0802672	-0.111968	0.120254	-0.106149	0.440947	-0.178436		0.285958	-0.511139	-0.277768
		CEACAM1	0.365515	-0.183847	1.23764	0.137389	-0.0336061	-0.155083	0.251774	0.0818426	0.540944	-0.00939589		-0.435529	-0.926195	-0.35364	0.521663	0.970809	0.398469	1.23798	0.881954	-1.15751	-0.0278704		-6.01552	-1.70304	-1.80993	-0.250219	-1.939	-1.0108	-1.20152	-2.23238	-3.69125	-2.26561		-0.081555	-0.617989	-0.192918	-0.206705	-0.0760448	-0.288436	0.351189	-0.128599	-0.529576	-0.0501973		0.138592	-0.693936	-0.89466
		CLEC4A	1.41419	-0.428102	0.050455	0.12457	0.318515	0.089879	-0.21294	0.304199	-0.284326	0.763262		1.11853	-0.736306	0.401242	-0.0104501	0.495096	-0.264089	-0.0163673	0.434348	-0.196989	0.172545		1.68528	-0.653979	0.0834522	0.498492	-0.140734	-0.311704	-0.206227	0.345208	-0.00643917	0.239055		1.14582	0.0678903	0.27533	0.253312	0.20134	-0.0900923	-0.211498	-0.318762	-0.461131	0.212794		1.0289	-0.931558	0.384824
		MCAM	-0.203616	0.155248	-0.218105	-0.00512987	-0.115179	2.66973	-0.175331	0.105233	0.180006	-0.320912		-0.303756	0.169817	-0.0103311	-0.204636	0.56231	0.988974	0.181373	0.725186	-0.139709	-0.0972056		-1.61019	0.806972	-0.84368	0.170261	0.282096	1.16003	-0.282987	-0.208864	-0.202544	-0.741418		-0.0630682	0.0429006	-0.00627112	-0.0175546	0.0844413	-0.737741	-0.0593602	-0.00431221	-0.321057	-0.0253371		0.717733	-0.372829	0.294282
		ITGA4	0.00181534	-0.325524	0.0195998	0.0306686	-0.400144	0.705113	-0.18949	0.120781	-0.0789459	1.37957		-0.145732	0.347483	0.404677	0.125471	1.05328	1.40083	0.248691	1.26232	0.748883	-1.31641		-0.596812	-0.581804	0.52636	-0.46227	0.354675	0.715005	0.229482	-0.0319938	-0.840152	-0.315776		-0.153641	0.350314	0.0330079	-0.0625979	0.0266557	0.0646957	-0.0689432	-0.00101877	-0.538462	-0.917632		0.239298	-0.387708	0.294143
		CD97	0.491039	0.521243	-0.086497	0.0451277	-0.0367993	0.267041	-0.0127099	0.0365463	-0.010935	0.018594		0.268686	0.493798	0.0694786	0.185272	0.245036	0.377791	0.11173	0.298623	0.00669145	0.115122		-0.457562	-0.721171	-0.447826	-0.79791	-0.386628	-0.983506	-0.814643	-0.793332	-1.62678	-0.226078		-0.0571096	0.124789	0.0891619	-0.00682936	-0.0355548	-0.101603	-0.0904679	0.0200332	-0.30022	0.0205604		0.490758	-0.00205204	0.150606
		CD84	0.00873368	-0.00913248	-0.139762	1.48466	0.076961	-0.0676586	0.126294	0.180884	-0.524729	0		-0.0727594	0.0531098	-0.0175443	0.046957	0.198851	-0.0676586	0.191891	0.289835	-0.45707	0		-0.131028	-0.0953102	-0.139762	0.0190482	0.0198026	1.67105	0.175891	0.0504309	-0.485508	0		0.0595921	0.119801	0.889857	-0.0292704	0.678034	-0.047856	0.11493	-0.14842	-0.524729	0		0.138999	-0.0953102	0.126294
		SELE	2.02769	-0.00913248	-0.139762	-0.0194181	0.076961	-0.0676586	0.531759	-0.735407	-0.524729	-0.398776		-0.0727594	0.0531098	-0.0175443	0.046957	0.198851	-0.0676586	-0.501256	0.293698	0.638422	-0.398776		-0.131028	-0.0953102	-0.139762	0.0190482	0.425268	2.14062	-0.517257	1.27034	-0.485508	-0.398776		0.0595921	0.119801	-0.139762	-0.0292704	0	1.34333	-0.578217	-1.06471	-0.524729	-0.398776		0.138999	-0.0953102	2.07583
		ITGA6	0.841037	-0.338575	0.119487	-0.11767	-0.413507	0.300061	0.0386611	-0.142523	0.425816	0.0133067		0.656213	-0.0214642	0.00766805	0.134279	0.306684	0.300001	-0.380864	0.454708	0.332804	0.0445754		0.616121	-0.158961	0.585906	0.44579	0.0918904	0.181052	0.603418	0.231473	0.690828	0.275987		-0.0310083	-0.0851104	-0.125538	-0.0643345	0.0325194	-0.0962388	-0.0377964	-0.0731563	0.0414963	-0.135478		0.652719	-0.00960304	-0.0116884
		JAM3	-0.169415	-0.161781	0.866534	0.0376599	-0.0199162	0.384585	-0.00732612	0.051963	-0.884745	0.545033		-0.171399	0.103135	1.20814	0.231433	0.340764	0.504717	0.276515	0.327648	1.36235	-1.65441		-0.326834	-0.161911	-0.235686	-0.266596	-0.0408218	-0.198537	-0.225359	-0.534934	-0.516949	0.617715		-0.162301	0.0318476	0.891429	-0.0493575	0.0319184	0.221106	-0.0103973	-0.0342165	-1.20818	-1.65441		0.108004	-0.0332869	0.110738
		ITGA2	-1.23361	-0.0487793	0.652855	-0.0324024	-0.326481	1.19796	0.444551	-0.303392	0.0748135	0.0391078		-0.89611	-0.375828	0.107395	0.284895	-0.0233958	0.392986	0.0902481	0.826509	0.357565	0.288977		-1.38622	-0.377983	0.382184	0.235993	0.0886074	-0.137155	0.324973	0.0772643	0.0593516	0.331768		-0.356347	-0.102292	0.111802	0.0954195	-0.0176212	0.105848	-0.312397	-0.0834148	-0.296308	-0.00989518		1.20875	-0.320323	0.155361
		CEACAM6	1.31783	-2.53704	1.239	1.48466	-1.01831	-0.0676586	1.22491	0.180884	-1.4422	0		-0.472359	-1.78165	-0.0175443	2.06247	1.74672	0.83656	0.191891	0.289835	-0.279051	1.20896		-0.105361	-2.62322	-0.139762	0.0190482	-1.07547	0.0633696	0.175891	0.0504309	-0.014286	0.14842		-0.340008	-2.40811	-0.139762	-0.0292704	1.28981	1.05402	0.11493	-0.14842	-1.4422	0		-0.260601	-0.683039	0.126294
		CD164	0.0805846	0.050931	-0.0437489	-0.0178448	-0.0397261	-0.0574733	0.0823776	0.23302	0.0582013	-0.123824		-0.047099	-0.0785557	0.0138139	-0.00744454	-0.232313	-0.149508	0.24712	0.0941452	-0.0712372	0.0113064		-0.086557	-0.306991	-0.113038	0.0905496	-0.783419	-0.297105	0.0279088	-0.0149836	0.112206	0.0257688		-0.0864757	-0.0173781	-0.0135029	-0.0985713	-0.0151853	0.016998	0.0704128	0.0234634	0.0903725	0.0906385		0.206837	-0.123953	-0.113578
		CD99	0.181708	-0.171268	-0.229852	-0.0440179	-0.129431	-0.231735	-0.0283638	0.00665155	0.868096	-0.0423981		-0.267406	-0.0806559	-0.0211219	0.0565454	0.333548	0.0685033	-0.0403308	0.180465	0.998661	0.0340833		-1.32975	-0.217563	-0.194781	-0.327669	0.069811	-0.0511641	-0.0700008	0.0411664	1.23677	-0.158611		-0.0122178	-0.0155978	-0.0965442	0.03055	-0.0937085	-0.0482033	-0.0672224	-0.0195982	0.945708	-0.00420709		-0.462902	-0.153105	0.137015
		AMICA1	2.05563	1.12579	0.416736	-1.86769	-0.369807	-0.85681	-1.48186	0.428354	-0.524729	1.16399		0.443931	0.743281	0.0920875	-0.193489	-2.1904	0.0923843	-1.41626	0.294549	-0.45707	1.01974		1.60117	0.671751	-1.05848	-1.74242	-0.0013708	-3.15588	1.05264	0.592715	1.819	0.535005		1.45175	1.29063	0.152861	-0.725552	0.0358783	0.18661	-1.49323	0.193529	2.04483	0.613582		0.991071	0.462922	-0.206245
		CD81	0.00045928	5.69926e-05	-0.161101	0.0683114	-0.0137765	-0.00927067	0.123377	0.158018	-0.0232419	-0.117554		0.057417	0.101742	-0.0286693	0.206463	0.462675	0.2123	0.484661	0.597336	0.360772	0.0897016		-0.397777	-0.0415356	-0.185678	0.0199498	0.228001	0.0352744	0.0961054	-0.0454385	0.118704	0.165508		-0.0350285	0.0865858	-0.102971	-0.0525844	-0.0362291	-0.0317952	-0.00298728	-0.0229379	-0.161004	-0.0265132		0.534507	0.12202	0.0554301
		ICAM3	0.229314	0.11675	-0.321559	-0.06598	-0.00607938	-0.0277492	0.249153	-0.0703609	-0.168728	0.0468107		0.640566	-0.177508	-0.0216703	-0.19605	-0.18283	-0.0618174	-0.409518	-0.462611	-0.518187	-0.119297		-2.71756	-0.714253	-1.20623	-2.0834	-0.524758	-0.648181	-1.38323	-1.42294	-1.12991	-1.55055		-0.057788	-0.0598724	-0.261042	-0.0824095	-0.00475541	-0.119375	-0.0350083	0.0626147	-0.187759	-0.0839939		-0.229874	-0.0411781	0.194692
		SELL	0.326133	0.766861	-0.139762	-1.81118	0.076961	0.609529	-0.90354	-0.224581	1.31741	-0.14775		-1.77431	0.246835	0.675603	1.05884	3.29398	1.72438	0.357912	3.27149	2.02394	1.42852		-0.153617	0.619949	-0.139762	-1.77271	1.26976	-0.632706	-2.46225	-0.355034	-0.485508	-1.78675		-1.64196	0.280162	0.486176	-0.572519	0.678034	0.110488	-2.52321	1.10625	-0.524729	0.481247		1.55045	-0.17259	0.53458
		CD44	1.3212	-0.423998	-0.302263	0.042884	0.0404533	-0.0875738	-0.0397404	-0.136616	-0.478493	-0.101802		0.543081	-0.0880593	0.0164296	0.0233441	0.405211	-0.21768	-0.520581	0.304464	0.0522497	0.126949		0.23669	-0.232482	-0.296878	-0.0420094	0.451042	-0.306164	-0.479636	-0.162281	-0.392714	-0.493931		0.231293	0.0195168	-0.162609	-0.000496081	-0.032664	-0.171224	-0.193111	-0.0895571	-0.307786	-0.238667		0.318454	0.264658	0.13565
		ITGB1	-0.245675	-0.216998	0.193654	0.043853	-0.0611384	0.0501334	-0.0650727	0.0968122	-0.411798	-0.060466		0.0876736	0.123436	-0.014461	0.137909	0.371499	0.157133	0.306487	0.533486	-0.224618	0.0594306		-0.2934	0.079064	0.500162	0.404012	0.405061	0.0522337	0.0982266	-0.00475962	-0.28674	0.448212		-0.0869146	-0.0635744	-0.0474095	-0.0445693	-0.0410062	0.0132459	-0.112731	0.000362919	-0.436372	0.0662648		0.399048	-0.0319252	-0.0594728
		ITGAE	-0.0999934	-0.0887309	-0.34217	0.0512509	0.0577669	-0.185955	0.116961	-0.18159	-0.0347264	-0.115047		-0.131976	-0.0627227	-0.147165	-0.104779	0.124726	-0.181445	-0.263145	-0.304746	-0.0740974	-0.198233		-0.134176	-0.355888	-0.266434	-0.0372149	-0.0130775	0.0996676	-0.366361	-0.0535391	-0.103943	-0.341397		-0.0259515	0.0533699	-0.0971229	-0.0432378	0.0612238	-0.135909	0.266028	0.0809835	0.191171	0.0210278		0.137536	0.0707179	-0.0474929
		CD47	-0.153206	-0.0445292	-0.303394	0.0172199	-0.0571448	-0.399829	0.0551461	0.0428621	0.0595308	-0.0920689		0.102218	0.0935881	-0.00398026	0.159988	0.289277	-0.0565556	0.229829	0.276249	0.0265745	0.0573994		-0.00835772	0.270749	0.114638	0.324562	0.341064	-0.00676475	0.0571647	-0.1422	0.00939908	0.198816		0.0592272	0.093327	0.0030189	0.00540521	0.039078	0.0548235	0.174011	-0.0012777	0.0368962	0.134286		-0.0714967	0.0307977	-0.0270397
		CD63	0.074637	-0.343877	-0.163275	-0.126095	-0.148843	-0.616729	-0.152466	0.0670474	-0.229601	-0.218735		-0.161344	-0.0627841	0.0253046	-0.129415	0.0404126	-0.204948	0.163414	0.329538	-0.1719	-0.109614		-0.637856	-0.537636	0.358518	0.331258	0.0218544	0.440145	0.0266001	0.474592	0.509274	0.59033		0.0158627	-0.0606539	-0.0585151	0.0773802	-0.0145524	0.0334036	0.15812	0.0126925	0.0491861	0.00135606		0.463188	0.148878	0.414502
		NCAM1	-0.871749	-0.473392	-0.468113	-0.10937	-0.30235	-0.314701	-0.0981445	-0.210826	0.269857	0.412458		2.34772	0.133584	1.27019	0.075457	0.0765231	0.972668	0.389126	0.353232	1.28605	1.08884		-2.26799	0.446474	1.86572	0.85278	-0.255996	0.0203447	-0.0104998	-0.284112	0.357643	0.976454		1.10102	0.113806	-1.84688	-0.0511204	-0.0502914	0.306148	0.198771	0.0452462	0.241372	0.470004		1.41913	-0.0700363	0.0741169
		CDH5	0.192485	0.622616	-0.162463	-0.214534	-0.307212	-0.489603	-0.446783	-2.16885	0.866863	-0.298473		0.344628	0.212274	-0.399542	0.191593	0.437261	-0.315571	0.288935	-2.0599	0.306387	-0.0673156		0.330047	0.310534	0.302601	-0.626264	0.238519	0.36936	-0.0464367	0.667323	1.17029	0.237192		-0.375829	0.362349	0.180022	-0.613069	0.195471	0.0606551	-0.612826	-2.13351	0.354762	-0.0223393		0.468513	0.490202	0.24247
			Log2(Treated/Ctrl)
			-4															4
			-4	-3.5	-3	-2.5	-2	-1.5	-1	-0.5	0	0.5	1	1.5	2	2.5	3	3.5	4
[truncated: 4 more columns]

## Sheet: 3-Costimulatory molecules
		Supplementary Table S4. Sheet #3. Modulation of immune-related genes belonging to 21 functional classes by epigenetic drugs. Ten melanoma cell lines were treated with the indicated drugs and then gene modulation was evaluated by the Nanostring Cancer immune panel. The 731 genes were grouped into the indicated functional classes (sheets 1 to 21 of this file). Extent of modulation is shown as Log2(…
		3-POSITIVE AND NEGATIVE COSTIMULATION
		GUADECITABINE											GIVINOSTAT											JQ1											GSK-126											ABEMACICLIB
	Gene symbol	VRG100	BRM17	FRN39	CST30	BNV13	MNT59	GRD43	GML41	CPN20	SLN91		VRG100	BRM17	FRN39	CST30	BNV13	MNT59	GRD43	GML41	CPN20	SLN91		VRG100	BRM17	FRN39	CST30	BNV13	MNT59	GRD43	GML41	CPN20	SLN91		VRG100	BRM17	FRN39	CST30	BNV13	MNT59	GRD43	GML41	CPN20	SLN91		VRG100	BRM17	CST30	MNT59
	CTLA4	4.66187	2.89317	2.95202	1.12186	-0.0267348	0.835193	1.22705	0.61301	1.94893	1.639		-0.0727594	-0.0666914	0.0831504	-0.296542	0.458985	0.537267	1.23368	1.20942	0.496305	0		-0.131028	-0.764158	2.46332	0.671257	-0.973157	-0.0565491	-0.341856	-1.1301	-3.55397	2.55023		0.0595921	-0.13123	0.0760329	0.345141	0.158209	-0.186157	0.84035	0.240037	-0.0430023	0		1.39067	1.06443	0.210392	-0.00676345
	LAG3	4.9363	1.20735	-0.123415	-1.40571	0.133465	1.34089	0.126294	0.180884	0.909972	2.19944		1.63027	-0.067957	0.266667	-1.33934	0.153622	1.09705	0.599118	0.289835	-0.176042	2.86106		2.16755	0.128075	0.693147	-1.36725	-1.41799	-0.629778	0.175891	0.0504309	-0.892943	1.00063		1.44589	0.456409	0.455779	-1.41556	0.0429562	1.90155	0.11493	-0.14842	1.00802	2.1883		0.138999	-0.129337	-1.26	0.887853
	ICOSLG	2.26414	0.27769	0.84891	0.0469797	0.226894	1.54078	1.37925	-0.618732	1.93657	0.280173		0.332706	0.380371	0.168093	-0.0327634	0.329589	-0.368764	1.3129	-0.00308631	0.638422	0.413029		-0.131028	0.115648	-0.740355	0.0609804	0.862412	0.977904	0.582157	-0.763656	4.14125	-0.759146		0.0595921	0.0216123	0.102714	-0.323388	-0.0346487	-0.741003	-1.96371	-0.0019368	0.945447	0.283206		2.49001	-0.997333	-0.573548	1.22433
	CD40	0.428906	0.31835	2.33846	0.0611706	0.181762	0.372132	1.10642	0.578102	1.31741	0.0252249		0.532291	0.459609	0.675603	0.438717	0.777182	1.02001	1.89744	1.84357	-0.45707	0.328532		-0.964894	-0.122078	-0.139762	-0.546161	0.0371572	-0.480488	-0.922722	-2.24289	0.616304	-0.463909		-0.108505	0.401899	1.98847	0.00318261	0.0810472	0.291962	-0.983682	-0.168254	-0.524729	0.208981		0.0791243	-0.260593	0.0944046	-0.103908
	CD28	1.26522	-0.569814	1.93341	-0.0194181	0.770108	-0.0676586	0.126294	0.180884	3.03546	-0.028889		1.94089	-0.691422	-0.0175443	0.046957	0.198851	0.83656	0.191891	0.289835	2.58389	-0.577787		-0.131028	-0.276803	-0.139762	0.0190482	0.0198026	0.0633696	0.175891	0.0504309	0.207639	-1.78675		0.0595921	0.119509	-0.139762	-0.0292704	1.08519	-0.047856	0.11493	-0.14842	-0.524729	-1.78675		0.138999	-2.44928	0.126294	1.07017
	TIGIT	1.00281	-0.162824	-0.55481	2.65541	0.076961	-0.16472	1.3297	0.297133	0.47222	1.23863		0.350918	-0.103635	-1.52452	0.046957	0.198851	-1.45395	-0.906721	0.370801	-0.45707	0.912713		-0.449475	0.922489	-1.64673	1.96631	0.0198026	0.284757	-0.922722	0.492707	-0.485508	-0.806476		0.584179	-1.13556	-1.64673	-0.0292704	2.1838	-0.332275	-0.983682	-2.67277	0.0291566	-0.00447428		0.415293	-1.02136	2.43226	0.664709
	HAVCR2	2.28717	1.27021	0.545208	1.04597	1.46827	0.41202	-2.17565	0.662027	-0.312893	-0.00610875		3.66115	0.742627	-1.89135	0.689294	3.77731	-0.263403	0.63164	0.791996	-0.378788	-0.696808		1.97571	1.43232	-2.01357	1.04934	0.581626	-1.44071	-2.12605	0.464417	0.209054	0.193224		-0.340008	-0.800119	-0.290802	0.372889	2.34345	0.156373	-2.18701	-1.22746	-0.26816	-0.242824		1.87902	0.412685	1.41052	-0.0284379
	CD40LG	-0.220831	1.01817	2.15681	0.623467	2.27419	0.346656	-1.26017	0.222591	-2.02946	0.893716		-2.32128	-0.173663	-0.0175443	-0.644357	0.198851	-0.774229	-2.39565	0.966921	-1.27334	-0.0910781		0.531717	0.610081	-0.139762	1.54592	2.15756	-1.03524	-2.81888	1.00353	-1.99024	-1.3512		-2.18893	0.454945	1.4014	1.03168	1.37372	0.803635	-2.87984	-0.575978	-2.02946	-0.697621		-1.7066	0.412685	1.73912	0.482388
	PDCD1LG2	0.271405	-0.110652	0.775165	0.00563382	0.0820385	0.936643	1.91711	-0.421288	0.138825	-0.437753		-0.336643	0.0436163	0.777826	0.201878	-0.246317	0.83656	0.191891	-0.15782	-0.723635	-1.09527		-2.72667	-0.226575	-2.7447	-4.12363	-0.805872	0.0633696	0.175891	-1.65275	-2.35457	-1.09527		-0.0943539	0.155848	0.277184	-0.605907	-0.100493	2.03526	0.11493	-1.8516	-0.543295	-1.09527		0.57562	-0.0985547	-0.547474	-0.0284379
	CD274	1.1866	3.12796	-0.00182815	0.325665	-0.411406	-0.855117	-0.311699	-0.735407	0.0645681	0.699821		2.38608	3.09681	-1.57797	1.06781	0.207474	0.988974	0.467063	3.02696	0.191035	2.64668		-0.105143	3.50228	-0.603248	0.45635	-0.208054	-1.72839	-2.34098	-0.86586	-1.40059	0.954824		0.862006	2.64811	-0.0650866	0.173093	0.0821963	-1.83962	-0.0301478	-0.193417	-0.0988643	1.7296		2.33947	2.69155	-0.0706816	-1.8202
	PDCD1	0.00873368	-0.00913248	-0.139762	0.386047	1.17557	-0.0676586	1.7346	0.180884	-0.524729	0		1.79759	0.0531098	-0.0175443	0.046957	0.198851	-0.0676586	0.191891	0.289835	-0.45707	0		-0.131028	-0.0953102	-0.139762	0.0190482	0.0198026	0.0633696	0.175891	0.0504309	0.207639	0		0.0595921	0.119801	-0.139762	-0.0292704	0	-0.047856	0.11493	-0.14842	-0.524729	0		0.138999	-0.0953102	0.126294	-0.0284379
	CD80	0.00873368	-0.00913248	1.93341	0.320877	-0.611174	-1.16627	0.596874	-0.735407	0.981569	0		2.17654	0.746257	-0.0175443	-0.318143	0.813718	-1.16627	-1.41626	-0.626456	-0.45707	0		-0.131028	-0.0953102	-0.139762	-1.803	-0.854583	1.44747	-0.739117	-0.86586	-0.485508	0		0.0595921	0.119801	1.17665	-0.227654	0.908556	-1.14647	-1.49323	-1.06471	-0.524729	0		0.138999	-0.0953102	-0.664994	0.259244
	ICOS	0.00873368	-0.00913248	-0.139762	0.896873	-0.0662494	0.0589406	0.475004	0.0141863	-0.524729	0		-0.0727594	0.0531098	-0.0175443	0.046957	0.668948	1.34274	0.23484	0.639308	-0.45707	0		-0.131028	-0.0953102	-0.139762	1.63037	-1.84076	0.0611396	-1.6148	-1.51574	-0.485508	0		0.0595921	0.119801	-0.139762	-0.0292704	0.287942	-0.51453	-1.96154	0.0711404	-0.524729	0		0.138999	-0.0953102	2.07583	1.46134
	PVR	-0.000137877	0.192194	-0.0504729	0.0150031	0.0241204	-0.101763	0.0637052	-0.0357418	0.57538	-0.0909661		-0.0632907	0.253059	-0.125503	0.305803	0.0819637	0.0829972	0.159656	0.0675785	0.470351	-0.194197		0.0164944	0.0832696	-0.112891	-0.310446	0.0802582	-0.378963	-0.285366	-0.193842	0.593835	0.194595		-0.0528095	0.0540957	0.0963057	0.0682901	0.0146269	0.0092257	-0.0105426	-0.0484926	0.367275	-0.198844		0.720852	0.131536	0.150647	0.241994
	CD276	-0.0599647	0.101761	0.114328	0.0104685	-0.00333738	0.208767	0.0591062	0.229111	-0.348962	-0.10116		-0.141204	0.195121	0.0484319	0.206842	0.246679	0.0927951	0.572457	0.339244	-0.441799	-0.0105274		-0.288436	-0.356753	-0.178137	-0.0607236	-0.00686346	-0.29533	-0.442195	-0.306216	-0.878226	-0.251236		-0.0305535	0.0895879	-0.00144322	0.0860871	0.0337679	0.090732	0.103373	-0.0101165	-0.338928	0.0456205		0.486723	0.2238	0.398948	0.05607
	BTLA	0.395037	1.09253	0.390648	0.386047	-2.75154	0.93481	-1.37707	0.180884	0.212682	0.642277		0.0717855	1.66255	-0.244186	0.046957	-0.140649	0.547527	-2.00462	0.289835	-0.42216	0.402781		0.824223	1.08026	-0.440017	2.21732	-0.796409	-0.629778	0.464285	0.0504309	0.208851	0.135206		0.269934	1.82748	-1.12779	-0.0292704	-0.44341	0.766337	-2.08158	-0.14842	-0.550551	0.465301		-0.815338	-0.0953102	1.51682	-1.41473
	CD200	0.427759	-0.40276	-0.0321244	-0.0848438	-0.242555	-0.674449	-0.076543	-0.381331	-0.765005	1.487		0.201517	-0.295135	0.130466	-0.155462	0.0721984	-0.362067	-0.496469	0.187173	-0.636708	0.590946		-1.68764	-1.65489	-1.09333	-0.731966	-0.234805	-1.42898	-0.807552	-0.580267	-2.20883	-1.12406		-0.17984	-0.0695671	-0.260048	-0.0429165	-0.085598	-0.137961	-0.226669	-0.0584944	-0.394861	-0.291598		0.320522	-0.516206	-0.16511	-0.39036
	CD86	0.00873368	-0.00913248	-0.139762	-0.0194181	-0.298127	-0.0676586	0.126294	-1.68959	-0.524729	0		-0.0727594	0.0531098	-0.0175443	0.046957	-0.622936	-0.0676586	0.191891	-1.58064	-0.45707	0		-0.131028	-0.0953102	-0.139762	0.0190482	-3.23576	1.85367	0.175891	-1.42006	-0.485508	1.45161		0.0595921	0.119801	-0.139762	-0.0292704	0.206221	-0.047856	0.11493	-2.0189	-0.524729	0		0.138999	-0.0953102	0.126294	-0.0284379
		Log2(Treated/Ctrl)
		-4															4
		-4	-3.5	-3	-2.5	-2	-1.5	-1	-0.5	0	0.5	1	1.5	2	2.5	3	3.5	4
[truncated: 3 more columns]

## Sheet: 4-Myeloid-related
		Supplementary Table S4. Sheet #4. Modulation of immune-related genes belonging to 21 functional classes by epigenetic drugs. Ten melanoma cell lines were treated with the indicated drugs and then gene modulation was evaluated by the Nanostring Cancer immune panel. The 731 genes were grouped into the indicated functional classes (sheets 1 to 21 of this file). Extent of modulation is shown as Log2(…
		4-MYELOID-RELATED GENES
		GUADECITABINE											GIVINOSTAT											JQ1											GSK-126											ABEMACICLIB
	Gene symbol	VRG100	BRM17	FRN39	CST30	BNV13	MNT59	GRD43	GML41	CPN20	SLN91		VRG100	BRM17	FRN39	CST30	BNV13	MNT59	GRD43	GML41	CPN20	SLN91		VRG100	BRM17	FRN39	CST30	BNV13	MNT59	GRD43	GML41	CPN20	SLN91		VRG100	BRM17	FRN39	CST30	BNV13	MNT59	GRD43	GML41	CPN20	SLN91		VRG100	BRM17	CST30	MNT59
	CD14	0.259372	0.987458	4.0734	1.63258	0.305242	2.92757	2.20503	0.180884	3.62047	2.96166		0.905063	0.194606	-0.0175443	1.01299	2.06298	1.17072	2.79556	0.289835	-0.45707	2.14593		-1.39442	-1.41782	-0.139762	-2.46506	-0.827661	0.0633696	0.175891	0.0504309	-0.485508	0.662688		0.367678	-0.31921	-0.139762	-0.811331	-0.00836381	-0.047856	0.11493	-0.14842	0.434622	2.00553		-3.63073	-1.4145	-2.35781	-0.0284379
	TREM2	0.804651	0.620517	2.74448	1.64316	-0.403921	4.4316	2.32289	0.180884	1.76982	0.728701		1.02811	0.613402	-0.0175443	0.564374	-0.565623	1.17072	1.10924	0.289835	1.61886	-0.695832		-1.0438	-0.628265	-0.139762	-1.42731	0.0592599	1.85367	0.175891	0.0504309	-0.485508	-1.31641		-0.160037	0.630512	-0.139762	-0.262534	-0.493461	-0.047856	0.11493	-0.14842	-0.524729	-1.31641		1.57723	-0.837094	-2.70635	1.581
	MST1R	0.178804	2.76234	2.79834	0.126021	0.753335	0.973939	1.77558	0.471605	2.10734	2.15587		0.544018	-1.82149	0.675603	0.198517	-0.288702	0.0137319	-1.41626	0.149256	-1.71068	-1.31641		-0.710492	-0.176481	-0.139762	-0.903733	-2.19854	-0.855051	-1.43226	-1.07599	-1.73912	-1.16799		0.109912	-1.34933	-0.139762	-0.258364	-0.199506	-0.555142	-1.49323	-0.0864087	-1.77834	-1.31641		0.251498	-0.791251	-0.628761	-0.945102
	THBD	0.295174	0.74183	2.22561	0.144024	0.192319	2.00155	0.681347	1.15246	1.43304	0.458357		-0.209475	-1.0757	-0.10195	0.0663715	0.125268	-0.0120888	-0.00999546	0.898269	-1.15853	0.314387		-0.496923	-0.793037	0.291906	-1.68924	-0.0185667	1.41135	-0.303236	0.341993	-2.18493	-0.195353		-0.193508	0.517156	-0.00166355	-0.0547278	-0.0783884	0.495217	-0.197845	0.206665	0.20039	0.149036		1.39856	0.71633	-0.231999	0.423547
	CLEC6A	0.217255	1.93809	2.05077	-0.0194181	2.27419	0.172932	-0.432406	2.48491	-0.524729	0		-1.57293	0.0531098	-0.0175443	0.046957	0.198851	-1.6771	-1.7531	3.26306	-0.45707	0		-1.20593	-0.0953102	-0.139762	0.0190482	0.0198026	-1.54607	-1.7691	3.01706	-0.485508	0		-1.44058	0.119801	0.889857	-0.0292704	2.6953	-0.959257	-1.83006	1.31252	-0.524729	0		-1.36117	-0.0953102	1.22773	-1.63788
	NRP1	0.0732686	0.516337	3.37931	0.306664	0.21406	0.58033	0.594459	0.180884	1.3214	0.682014		-0.354268	-0.0598826	0.696316	0.58825	0.748644	-0.222652	0.749082	0.289835	0.559837	0.378304		-0.767559	-0.494692	1.77109	-0.741777	0.0407653	0.877801	0.0635447	0.0504309	-0.317047	0.570561		0.133127	-0.163407	0.660019	-0.692506	0.307799	0.306675	-0.444897	-0.14842	0.256878	0.419264		-0.667916	-0.494958	0.312547	0.162544
	SLC11A1	1.99367	0.682218	-0.139762	-0.0194181	0.076961	-0.760806	1.15679	0.468566	2.14458	1.46375		2.28601	0.742627	1.36875	0.046957	0.198851	-0.760806	0.288965	1.13989	-0.45707	-0.285447		-1.6312	0.778194	-0.139762	0.0190482	0.0198026	0.0633696	-0.739117	1.99243	-0.485508	-0.398776		1.12501	0.907557	-0.139762	-0.0292704	0	-0.741003	-1.49323	1.54291	-0.524729	-0.398776		-0.958255	-0.173663	0.126294	-0.721585
	CD207	1.11358	0.56536	0.952161	0.387353	1.6864	0.753222	0.126294	0.180884	-0.524729	0.254642		1.59323	0.944126	-0.0175443	0.963615	0.198851	-0.215579	0.599118	0.289835	-0.45707	0.113329		0.144774	-1.2721	-0.139762	-1.59039	1.88858	0.754321	0.175891	0.450416	-0.485508	0		-1.19066	0.119574	2.09347	0.608929	2.47148	0.360872	0.11493	-0.14842	2.04483	0		-1.11125	0.0278348	-1.48314	0.782492
	CHIT1	-0.0961439	-0.162824	2.05077	0.846611	0.523909	1.18633	-0.971606	-0.282166	1.31741	0.770605		-0.183433	-1.20225	-0.0175443	0.801268	0.717949	1.08652	-2.00462	0.405578	0.924541	1.00977		-1.54664	0.585193	-0.139762	-1.36725	0.74215	0.418289	-0.228862	0.123748	1.71385	-0.398776		-1.09031	0.119509	-0.139762	0.286479	0.0967296	0.206721	-2.08158	-1.41411	0.434622	-0.398776		-2.10952	0.44608	0.130522	0.105093
	CYBB	0.930228	1.60214	-0.139762	0.386047	-0.611174	0.936643	0.126294	0.180884	-0.524729	1.86253		2.27682	0.746257	2.46662	0.046957	-0.489284	-0.0676586	0.191891	0.289835	-0.45707	0.955511		0.294239	-0.0953102	-0.139762	0.0190482	-0.668332	0.0633696	0.175891	0.963438	0.616304	0.662688		0.0595921	0.119801	-0.139762	-0.0292704	-0.688135	-0.047856	0.11493	-0.14842	-0.524729	0		1.05376	-0.0953102	0.126294	-0.0284379
	MSR1	0.344698	2.88277	1.239	-0.0194181	0.076961	-0.0676586	-0.972319	0.180884	0.981569	-0.551834		0.575164	2.13147	-0.0175443	0.046957	0.198851	-0.0676586	-0.906721	0.289835	-0.45707	0.602069		0.636862	-0.0953102	-0.139762	0.712195	0.0198026	0.0633696	-0.922722	0.0504309	-0.485508	-0.806476		0.646366	0.119801	-0.139762	-0.0292704	1.08519	-0.047856	-0.983682	-0.14842	-0.524729	-0.00447428		-0.35218	-0.0953102	0.126294	1.07017
	MRC1	-0.0848214	-0.00913248	0.544633	0.994214	0.849173	0.936643	-1.2584	0.180884	0.222941	1.46375		0.0198521	0.0531098	-1.72466	0.271429	-2.36147	-0.0676586	-1.1928	0.697448	0.00874837	1.44494		-2.58821	-0.0953102	-1.15373	-0.201955	0.613555	1.15905	-1.2088	0.0504309	-0.255427	1.21863		0.00976707	0.119801	0.0295282	-0.0832561	0.827789	1.5655	-1.26976	-0.14842	-0.635688	0		-0.524283	-0.0953102	0.225643	2.96777
	NCF4	0.467173	-0.660561	0.240288	0.0968218	-0.223011	0.396075	1.00257	0.180884	-0.608907	2.69598		0.380018	-1.29299	0.0272145	0.0875746	0.398567	1.07816	0.935867	2.54418	-0.441432	2.30658		-0.262867	-0.604166	-0.228419	-1.51073	-0.0604924	0.466639	0.359495	1.55086	-0.413922	1.2499		-1.19066	-1.06985	-0.410169	-0.131528	0.091891	0.584667	-1.49323	-0.14842	-0.444727	0		1.02836	-0.364139	-0.590442	0.725899
	CD68	0.648285	0.140291	0.48547	-0.0772988	0.0131691	1.23308	-0.138585	0.926463	0.0357168	-0.182011		-0.732098	-0.390135	-0.137453	-0.0331685	0.4893	-0.0994057	0.502051	0.465894	-1.28402	-0.670041		-0.751094	0.600079	0.530814	0.410867	0.468421	0.607233	0.0946828	1.265	1.10577	-0.303921		0.0617759	-0.0282876	0.0951894	-0.116482	-0.0569777	0.0342919	0.112177	-0.0466308	0.0339663	-0.0759734		0.591047	0.175971	0.295154	-0.226589
	HAMP	1.11803	2.55723	-1.50921	-2.21664	0.076961	1.44527	-0.344039	0.180884	-0.823007	1.99456		-0.0668942	1.4394	-2.99041	-2.15027	0.198851	-0.0676586	0.365378	0.289835	-2.59748	1.17607		-0.530628	1.84055	-3.11263	-2.17818	1.88858	0.0633696	-1.90275	1.2985	-2.62592	-0.398776		-0.340008	2.72488	-1.38986	-2.22649	2.82019	-0.047856	-1.96371	-0.14842	-2.11126	0.689786		0.654162	1.53393	-2.07093	-0.0284379
	TREM1	0.00873368	-0.00913248	-0.139762	1.13472	0.076961	1.62796	0.0121506	0.180884	-0.524729	0		-0.0727594	0.0531098	-0.0175443	1.96948	6.14556	-0.0676586	1.39286	4.83059	-0.45707	0		-0.131028	-0.0953102	-0.139762	-3.78719	0.0198026	0.0633696	-0.600947	0.0504309	-0.485508	0		0.0595921	0.119801	-0.139762	0.402325	0	-0.047856	-4.18827	-0.14842	-0.524729	0		0.138999	-0.0953102	-3.67994	-0.0284379
	MFGE8	0.187141	0.175774	0.107237	0.00818679	-0.0134769	0.197439	0.135808	0.171059	0.153487	0.156974		0.110568	-0.106476	0.199198	0.149677	0.604874	0.438352	0.421671	1.02854	0.20351	0.237799		0.219115	-0.223825	0.485335	0.164228	0.393878	0.0760101	-0.00078751	0.141152	-0.185616	0.241039		0.0331791	-0.0356007	0.00219108	0.00564656	-0.0260956	0.042295	-0.15449	-0.0622877	-0.244441	-0.000668612		0.187601	-0.243129	-0.371664	0.106466
	COLEC12	0.0133292	0.215221	-0.139762	-0.177712	0.076961	-0.0676586	0.126294	0.180884	0.758979	0		-0.303322	0.275098	-0.0175443	0.680385	0.198851	-0.0676586	0.191891	0.289835	2.63057	0		-1.13079	-0.513087	-0.139762	1.13419	0.0198026	0.756517	0.175891	0.0504309	1.30785	0		0.0907196	-0.247961	-0.139762	-0.115199	0	-0.047856	0.11493	-0.14842	0.434622	0		-1.44967	-0.573108	-1.45703	-0.0284379
	CD209	0.00873368	-0.00913248	1.239	-0.0194181	0.076961	-0.0676586	0.126294	0.180884	-0.524729	-1.24498		-0.0727594	0.0531098	-0.0175443	0.046957	0.198851	-0.0676586	0.191891	0.289835	-0.45707	-0.290663		-0.131028	-0.0953102	0.95885	0.0190482	1.88858	0.0633696	0.175891	0.0504309	1.30785	-0.249721		0.0595921	0.119801	-0.139762	-0.0292704	1.37372	-0.047856	0.11493	-0.14842	-0.524729	-1.49962		0.138999	-0.0953102	0.126294	-0.0284379
	CD163	0.00873368	-0.00913248	-0.139762	-0.0194181	0.076961	-0.0676586	0.126294	0.180884	-0.524729	0		-0.0727594	0.0531098	-0.0175443	0.046957	0.198851	-0.0676586	0.191891	0.289835	-0.45707	0		-0.131028	-0.0953102	-0.139762	0.0190482	2.54239	1.67105	0.175891	0.0504309	-0.485508	0		0.0595921	0.119801	-0.139762	-0.0292704	2.2895	-0.047856	0.11493	-0.14842	-0.524729	0		0.138999	-0.0953102	0.126294	-0.0284379
	CLEC7A	0.00873368	-0.00913248	-0.139762	-0.0194181	-0.26632	-0.0676586	0.126294	0.180884	-0.524729	0		-0.0727594	0.0531098	-0.0175443	0.046957	1.10235	-0.0676586	0.191891	0.289835	-0.45707	0		-0.131028	-0.0953102	-0.139762	1.11766	-4.41813	0.756517	0.175891	0.0504309	-0.485508	0		0.0595921	0.119801	1.4014	-0.0292704	-0.0201786	-0.047856	0.11493	-0.14842	-0.524729	1.08856		0.138999	-0.0953102	0.126294	-0.0284379
	CLEC4C	0.417093	-0.00913248	-0.139762	-0.0194181	0.076961	-0.0676586	0.126294	0.180884	-0.524729	-0.806476		-0.0727594	0.0531098	-0.0175443	0.046957	0.198851	-0.0676586	0.191891	0.289835	-0.45707	-0.806476		-0.131028	-0.0953102	-0.139762	0.0190482	0.0198026	0.0633696	0.175891	0.0504309	-0.485508	-0.806476		0.0595921	0.119801	-0.139762	-0.0292704	0	-0.047856	0.11493	-0.14842	-0.524729	-0.806476		0.138999	0.233994	0.126294	-0.0284379
	MARCO	2.53828	-0.874706	1.239	-0.712565	-0.457023	-0.760806	-0.461911	-1.56682	0.40125	-0.398776		1.1773	-2.20105	-0.0175443	-0.27776	-1.1797	0.477568	-1.08727	0.377552	-0.866675	-0.398776		-0.131028	-2.02016	-0.139762	-2.17818	-0.447806	-0.629778	-0.922009	0.0483611	-2.50081	-0.398776		0.0595921	-0.117306	-0.139762	0.0211424	0.279483	0.872349	-2.08158	-0.382092	0.265756	1.60675		1.05376	-0.173581	-2.07093	-0.0284379
	LBP	0.00873368	2.29529	-0.139762	-0.0194181	0.076961	-1.45395	-1.48186	0.180884	-0.524729	0		-0.0727594	0.0531098	-0.0175443	0.046957	0.198851	-1.45395	-1.41626	0.289835	-0.45707	0		-0.131028	1.3302	-0.139762	0.0190482	1.26976	0.621731	-1.43226	0.0504309	-0.485508	0.14842		0.0595921	0.119801	-0.139762	-0.0292704	0.678034	-1.43415	-1.49323	-0.14842	-0.524729	0		0.138999	-0.0953102	0.126294	-1.41473
	TFRC	-0.220931	-0.123993	-0.578466	-0.0299089	-0.249228	-0.502402	0.0528944	0.0203178	-0.460672	-0.400286		0.078175	0.0563026	-0.118388	-0.306984	0.0412072	0.176407	0.376721	0.277679	-0.166148	-0.416174		0.94883	0.389162	0.419592	-0.223716	0.213973	0.0160576	-0.15757	0.0605147	-0.319693	0.234198		-0.00190306	-0.121543	-0.00173306	-0.480967	-0.12724	-0.0140173	-0.0854758	-0.0953015	-0.232988	0.00789224		1.29207	-0.0925486	-0.407175	0.125633
		Log2(Treated/Ctrl)
		-4															4
		-4	-3.5	-3	-2.5	-2	-1.5	-1	-0.5	0	0.5	1	1.5	2	2.5	3	3.5	4
[truncated: 3 more columns]

## Sheet: 5-T_NK related genes
		Supplementary Table S4. Sheet #5. Modulation of immune-related genes belonging to 21 functional classes by epigenetic drugs. Ten melanoma cell lines were treated with the indicated drugs and then gene modulation was evaluated by the Nanostring Cancer immune panel. The 731 genes were grouped into the indicated functional classes (sheets 1 to 21 of this file). Extent of modulation is shown as Log2(…
		5-T/NK-RELATED GENES
		GUADECITABINE											GIVINOSTAT											JQ1											GSK-126											ABEMACICLIB
	Gene symbol	VRG100	BRM17	FRN39	CST30	BNV13	MNT59	GRD43	GML41	CPN20	SLN91		VRG100	BRM17	FRN39	CST30	BNV13	MNT59	GRD43	GML41	CPN20	SLN91		VRG100	BRM17	FRN39	CST30	BNV13	MNT59	GRD43	GML41	CPN20	SLN91		VRG100	BRM17	FRN39	CST30	BNV13	MNT59	GRD43	GML41	CPN20	SLN91		VRG100	BRM17	CST30	MNT59
	DPP4	0.00873368	-0.03236	2.33745	-0.0194181	2.97273	2.27219	2.69081	2.1007	4.36238	3.0165		-0.0727594	0.268454	1.49993	0.455476	1.65463	-0.0125337	0.191891	-2.41453	-0.45707	0.768371		-0.131028	-0.687119	-1.39377	0.0190482	-1.36148	-2.9816	0.175891	-3.06155	-0.485508	-0.806476		0.0595921	-0.0232426	1.10192	-0.0292704	1.49623	-0.256156	0.11493	-0.236082	-0.524729	-0.00447428		0.138999	-1.03536	0.126294	-1.28165
	CTSW	0.499865	2.7982	3.18599	1.68711	0.076961	0.936643	1.57736	1.28189	3.51516	1.95869		0.16565	0.39896	-0.0175443	0.046957	0.198851	-0.0676586	0.347652	2.16412	-0.45707	0		-1.12486	0.370005	-0.139762	0.0190482	0.0198026	0.0633696	-1.43269	0.450416	-0.485508	0		-0.0751525	0.255518	-0.139762	-0.0292704	0	-0.047856	-2.1849	-0.14842	-0.524729	0		-0.656865	-0.467172	0.126294	-0.0284379
	CD96	1.02617	1.11672	4.49826	-0.0194181	0.635436	2.59581	2.10917	0.180884	2.10267	1.39269		-1.04908	0.766465	1.9271	0.046957	0.958648	0.958447	0.760541	1.99751	1.33967	0.579193		-4.03788	-2.3893	-0.139762	1.81238	-2.9954	-1.93095	-1.66926	0.0504309	-0.693787	-2.19277		-0.13546	-0.0321379	0.486176	-0.0292704	-0.199482	-0.302368	-0.687089	-0.14842	-0.180278	0.976075		-0.0690504	-0.545663	0.126294	0.11915
	PRF1	2.93049	-0.00913248	2.05077	1.85389	0.770108	3.80687	2.76475	0.180884	-1.77834	0.770605		2.06508	0.0531098	-0.0175443	0.046957	0.198851	-0.0676586	-0.501256	0.289835	-1.02221	-0.398776		0.294239	-0.0953102	-0.139762	0.0190482	2.69124	0.0633696	-0.517257	0.963438	-0.127757	-0.250356		1.44589	0.525266	-0.139762	-0.0292704	1.59737	-0.047856	-0.578217	-0.14842	-1.77834	-0.398776		0.138999	-0.0953102	0.126294	-0.0284379
	SPN	-0.165509	2.8257	-0.139762	0.896873	0.076961	2.60924	2.61073	0.180884	0.758979	3.22366		0.646224	0.0531098	-0.0175443	0.046957	0.198851	-0.0676586	0.191891	0.289835	-0.45707	1.20896		0.398375	-0.0953102	-0.139762	0.0190482	0.0198026	1.44747	0.175891	0.0504309	0.903188	0		0.142556	0.119801	-0.139762	-0.0292704	0.678034	-0.047856	1.62091	-0.14842	-0.524729	0		-0.687718	-0.0953102	0.126294	-0.0284379
	CD4	0.87621	-0.163841	1.51781	0.960964	0.223387	3.33287	-0.125116	2.99573	0.758979	2.04511		1.1098	-2.30086	-2.16016	0.363418	0.399969	-0.0676586	-2.00462	2.23851	-0.45707	0.113329		-2.19867	-2.44928	-2.28238	-0.774588	-0.872064	0.0633696	-2.02062	3.05865	0.903188	0		0.184527	-2.23417	-1.25276	0.103403	0.323865	-0.047856	-2.08158	1.10625	-0.524729	0		0.209514	-1.27062	-1.51249	0.664709
	KLRC2	0.115963	2.67897	1.16457	-0.0194181	0.289516	3.89696	0.54343	0.874031	2.26213	0		-0.454912	1.87066	0.844758	0.046957	-0.485894	-0.0676586	1.03851	3.53117	3.15031	0		-4.45348	-1.80336	-3.89162	0.0190482	-3.23367	0.0633696	-3.19052	0.0504309	-0.485508	0		-0.304433	-1.58825	0.538843	-0.0292704	0.371137	-0.047856	-2.33405	-0.14842	0.722304	0		-1.20039	-1.80336	0.126294	-0.0284379
	GZMM	0.183692	2.55723	1.46366	1.48466	-1.70979	2.03403	1.22491	0.180884	1.85667	1.487		1.16661	1.15172	-0.0175443	3.28582	-1.5879	-0.0676586	0.191891	0.289835	1.84177	-0.577787		-1.43467	2.07717	-0.139762	1.96631	0.245341	0.0633696	0.175891	0.0504309	1.30785	-1.78675		0.243172	1.82748	-0.139762	1.98233	-1.78675	-0.047856	0.11493	-0.14842	-0.524729	-1.38797		-0.533269	0.746257	0.126294	1.581
	CD244	0.00873368	1.09253	0.461029	0.957213	0.870377	1.04035	0.974257	1.97384	1.85667	-0.038335		-0.0727594	0.0531098	-0.349464	0.0971459	-1.40318	-0.621044	-1.5988	0.289835	-0.45707	-0.659211		-0.131028	-0.0953102	-1.97478	-0.335318	-2.68357	-0.632706	-0.921653	1.55086	-0.485508	-0.693663		0.0595921	0.119801	0.630134	-0.194913	0.116815	-0.737741	-1.67576	-0.14842	-0.524729	-0.372775		0.138999	-0.0953102	0.313102	-0.0284379
	CD38	-0.228149	1.19411	1.93341	0.83922	1.86872	-0.0676586	0.293496	0.874031	3.49901	-1.49962		0.0309013	-0.529951	1.08107	0.543793	0.198851	-0.0676586	0.59874	2.43255	-0.45707	-0.879047		-0.747373	-0.25978	-0.139762	-0.315539	2.03209	1.44747	-2.22142	2.48921	-0.485508	-0.249721		-0.0822245	0.417564	0.486176	0.1608	2.6953	-0.047856	-2.28238	1.06054	0.722304	-1.49962		0.38059	-0.41299	-1.81962	-0.0284379
	GZMB	-0.581538	-0.00913248	-0.358905	-0.0194181	2.33375	3.54522	0.34427	0.874031	0.424047	0.363663		0.159965	0.0531098	-0.113619	2.06247	2.69252	0.434704	-0.396832	3.03338	0.204558	0.476847		-1.78657	-0.0953102	0.0928512	0.0190482	2.24679	1.012	-2.33555	2.3979	0.311688	0.0880158		-0.030017	0.119801	-0.453838	-0.0292704	2.07124	-0.105361	-0.523096	2.33315	0.775057	-0.0736614		0.209979	-0.0953102	0.126294	0.0287049
	LCP1	-0.0103715	1.13439	0.513671	0.220913	0.104152	1.35714	1.01892	1.13103	0.676863	0.172414		0.541592	0.619938	0.062954	0.782745	0.843194	0.943141	1.29705	1.45513	0.307886	-0.0863126		-1.14574	0.215198	0.367024	0.460465	-0.804322	-0.221474	-0.641665	0.20407	0.317509	-1.03016		0.361807	-0.143343	0.145947	0.0497541	0.047489	0.0749802	-0.170542	-0.895901	0.0962283	0.317712		0.411246	0.93099	-0.211659	-0.0920315
	CD3D	0.844671	-0.00913248	0.543802	-0.0194181	1.6864	1.62796	1.7346	0.180884	-0.524729	0		0.860869	0.0531098	-0.425904	0.046957	0.198851	-0.0676586	0.191891	0.289835	-0.45707	0.620576		-2.73521	-0.0953102	-0.548121	0.0190482	0.425268	1.15905	0.175891	0.0504309	-0.485508	0		-0.085406	0.119801	-0.548121	-0.0292704	1.37372	1.05402	0.11493	-0.14842	0.722304	0		-0.710352	1.08334	0.126294	2.051
	KLRD1	-0.493758	0.459978	0.649833	-0.0194181	0.076961	-0.0676586	0.531759	0.796514	2.7041	1.31818		-1.16786	-1.96421	-1.52452	0.046957	0.198851	0.324383	0.416092	-1.58064	0.638422	-0.693147		-2.14242	-1.78333	-0.548121	2.32258	2.26799	0.0633696	-0.517257	1.62603	3.72105	-0.806476		-1.9518	-1.89752	-1.64673	1.21924	0	0.650181	-0.578217	-0.557957	1.53323	-0.806476		-1.87239	-2.11263	1.73912	-0.0284379
	KLRC1	0.0189009	1.37945	1.64531	-1.40571	-0.042242	-0.0298125	-0.352798	2.37971	0.852351	0.833491		-0.210483	0.0531098	0.675603	-0.0852647	0.112084	-0.522914	-0.408678	0.697448	0.701387	0.219566		-6.55209	-0.0953102	-0.139762	-0.268634	-1.71954	0.312733	-0.159665	2.3979	0.996661	-0.0480092		-0.523406	0.119801	1.98847	-1.41556	-0.0755945	0.407688	-0.484592	-0.14842	0.497977	0.149036		-2.14757	-0.0953102	0.822614	0.798841
	GZMA	0.00873368	-1.71718	1.93341	-0.0194181	0.076961	4.94849	-0.853734	0.180884	-0.524729	0		-0.0727594	0.289739	-0.0175443	0.046957	0.896088	1.62428	-1.47952	0.289835	-0.45707	0		-0.131028	-1.80336	-0.139762	0.0190482	0.0198026	0.0633696	-1.90275	0.0504309	-0.485508	0		0.0595921	0.119429	-0.139762	-0.0292704	1.59737	1.5655	-1.96371	-0.14842	-0.524729	0		0.138999	-1.80336	0.126294	2.36946
	ENTPD1	0.352441	2.93675	0.986517	0.143846	-0.274622	0.0863218	-1.2592	0.107969	-0.0852842	0.877062		-2.08415	2.5373	-0.138317	0.488583	0.949445	0.0984178	1.22759	1.00753	0.362378	0.0983504		-1.71715	-0.0953102	1.44404	0.21636	-0.468447	-0.734738	-1.90275	-0.321283	-0.522977	-1.68391		0.350789	0.525266	0.61983	0.0329911	0.0639732	0.173231	-1.96371	-0.0398162	-0.165721	-0.00479617		-1.87239	1.33261	-0.185134	0.11608
	LAIR2	2.26414	-1.26449	1.239	-0.0194181	0.076961	-0.0676586	1.91758	0.180884	-0.524729	0		-0.0727594	-1.20225	-0.0175443	0.046957	2.50553	0.83656	3.69686	0.289835	-0.45707	0		-0.131028	-0.51342	-0.139762	0.0190482	0.0198026	2.00803	-0.517257	0.0504309	-0.485508	0		0.0595921	-1.13556	2.09347	-0.0292704	0	-0.047856	-0.578217	-0.14842	-0.524729	0		0.138999	-0.172012	0.126294	-0.0284379
	KIR3DL2	1.51763	-0.00913248	2.25175	2.23291	-0.835322	-0.16354	0.126402	0.180884	-1.4422	-0.28045		-0.0727594	0.0531098	1.9271	0.046957	-1.40658	-2.01357	0.599028	0.289835	-1.37454	-0.577787		0.294239	-0.0953102	-0.139762	2.32258	0.854159	-0.0922441	-1.7691	0.963438	0.544302	0.929933		0.0595921	0.119801	2.56361	-0.0292704	1.32576	0.206721	-1.83006	-0.14842	-1.4422	-0.984745		0.138999	-0.0953102	0.126294	0.105093
	TARP	2.45523	0.682381	0.158799	0.575965	0.076961	-1.1428	-0.210393	-1.5199	0.981569	1.35325		1.42922	0.135383	-2.5457	0.64198	0.198851	-2.1471	-0.047874	0.353005	1.33157	0.620576		-0.131028	0.720769	-0.723442	-0.267063	0.0198026	0.0611742	0.869954	0.558943	1.71385	1.7613		2.45749	0.940059	-0.658367	0.955881	1.59737	-1.02542	-1.4227	-2.95021	-0.524729	0		2.49001	1.03922	0.535284	-0.31612
	KLRF1	0.127171	0.139584	1.80042	-0.200512	-0.133617	1.78237	-1.2584	-0.735407	1.73715	0.140021		0.039579	-0.125787	-0.0175443	0.101541	-0.21296	0.324383	-1.1928	-0.626456	0.924134	-1.90509		-0.231982	0.196459	-0.139762	-0.567125	-1.11479	1.15905	-1.2088	0.0471468	1.74817	0.367038		0.320522	0.492639	0.486176	-0.129519	-0.00828256	-0.047856	-1.26976	-1.06471	0.720333	-0.25643		0.0164275	0.106472	-0.0303821	1.76332
	CD3E	1.71743	-0.00913248	-0.139762	1.85389	0.076961	-0.0676586	0.126294	0.180884	-0.524729	0		3.46656	0.0531098	-0.0175443	0.046957	0.198851	-0.0676586	0.191891	0.289835	-0.45707	0		-0.131028	-0.0953102	-0.139762	0.0190482	0.0198026	0.0633696	0.175891	0.0504309	-0.485508	0		0.0595921	0.119801	-0.139762	-0.0292704	0	-0.047856	0.11493	-0.14842	-0.524729	0		0.138999	1.84487	0.126294	-0.0284379
	PTGDR2	2.81604	-0.00913248	0.952161	0.49887	0.0354377	0.936643	0.740881	-2.78776	-0.524729	0.280064		-0.0727594	0.0531098	-0.0175443	-0.233287	-0.804104	1.93382	-0.440883	-2.67881	-0.45707	0.258235		0.701881	-0.0953102	-0.139762	-3.91221	-3.06668	0.0633696	-1.2404	-1.41779	1.30785	-2.41591		0.0595921	0.119801	-0.139762	-0.238302	0.511373	1.74717	-0.853473	-1.9081	-0.524729	-0.00447428		1.39067	1.33261	0.372675	2.36946
	CD58	0.550662	0.39379	0.229035	0.107338	0.0329575	0.405284	0.414022	0.163536	0.391158	0.107836		0.173127	0.0698293	-0.0178714	0.0780392	0.209433	-0.117567	-0.0438959	0.139725	-0.241542	0.121217		-0.124154	-0.468575	-0.951113	-0.386124	-0.107778	-0.237411	-0.607202	-0.465545	-0.434748	-0.205439		0.0667095	-0.0316463	0.0483681	-0.0481575	0.111168	0.0351988	-0.047367	-0.0508778	-0.164208	0.204804		0.264251	-0.287411	-0.192307	-0.168127
	CD7	-0.159762	0.898721	0.952161	-2.09886	0.076961	0.241663	0.126294	2.36597	0.421108	-0.398776		1.96542	-2.4748	-0.0175443	0.493611	0.198851	-0.215579	1.69656	2.15577	-1.71068	-0.398776		-3.06785	-0.450742	-0.139762	-2.06039	1.5217	-1.32292	1.78533	2.03495	-1.73912	-0.398776		0.55289	0.0370413	-0.139762	-1.70655	2.06686	-1.43415	0.11493	0.062221	-1.77834	-0.398776		0.565838	-0.55889	-1.95315	0.194706
	CD3G	2.63358	-0.00913248	-0.139762	-0.0194181	0.076961	-0.0676586	0.126294	0.180884	-0.524729	0		3.29867	0.0531098	-0.0175443	0.046957	0.198851	-0.0676586	0.191891	0.289835	-0.45707	0		-0.530628	-0.0953102	-0.139762	0.0190482	0.0198026	0.0633696	0.175891	0.0504309	-0.485508	0		-0.340008	0.119801	-0.139762	-0.0292704	0	-0.047856	0.11493	-0.14842	-0.524729	0		-0.260601	-0.0953102	0.126294	-0.0284379
	CD160	0.212983	-0.00913248	-0.139762	-0.0194181	2.1564	1.9161	-1.6644	0.180884	-0.524729	0		1.19404	0.0531098	-0.0175443	0.046957	0.198851	-0.0676586	-1.5988	0.289835	-0.45707	0		-3.01707	-0.0953102	-0.139762	0.0190482	0.0198026	0.0633696	-1.6148	0.0504309	-0.485508	0		-0.41802	0.119801	0.889857	-0.0292704	1.37372	-0.047856	-1.67576	-0.14842	-0.524729	0		-0.202485	0.746257	0.126294	-0.0284379
	GNLY	0.00873368	-1.26449	0.0596031	-0.0194181	0.076961	-0.0676586	0.126294	0.180884	0.631438	1.95869		-0.0727594	-1.20225	-1.89135	0.965081	0.198851	-0.0676586	0.191891	0.289835	-0.549592	1.57485		-0.131028	-1.35067	-2.01357	1.11766	0.0198026	0.0633696	0.175891	0.0504309	-1.03549	0		0.0595921	1.21812	-2.01357	1.21924	2.47148	1.90225	0.11493	-0.14842	-0.33475	0		0.138999	-1.35067	2.32634	-0.0284379
	CD8A	2.13868	-0.414598	-0.139762	-1.40571	2.1564	-0.0676586	-0.384833	0.180884	-0.524729	0		0.777705	-0.352355	-0.0175443	-1.33934	1.30019	-0.0676586	-2.11005	0.289835	-0.45707	1.40854		1.50538	2.283	-0.139762	-1.36725	0.0198026	0.0633696	-0.334294	2.48921	-0.485508	1.00063		-0.340008	0.119801	-0.139762	-1.41556	1.59737	-0.047856	-2.18701	-0.14842	-0.524729	0		-0.260601	-0.171472	-0.562625	-0.0284379
	GZMH	2.15237	-0.929053	0.544633	1.63974	0.929154	-1.17632	-0.90354	0.180884	-0.445253	-0.553385		-0.0727594	-0.866811	0.219984	0.607883	-0.19807	-0.9749	-0.00321322	0.697448	-1.37454	-0.696725		-0.131028	-1.01523	0.231312	1.89158	0.74215	-0.950427	-2.46225	2.57222	-0.301169	-0.0664451		0.0595921	-0.800119	0.386356	-0.722418	-0.259801	-2.44575	-2.52321	2.05875	-1.4422	-0.14792		0.138999	0.163424	2.00135	-0.346892
	GZMK	1.26522	-0.00913248	-0.139762	-0.0194181	0.076961	-0.0676586	0.126294	0.180884	-0.524729	0		-0.0727594	0.0531098	-0.0175443	0.046957	0.198851	-0.0676586	0.191891	0.289835	-0.45707	0		-0.131028	-0.0953102	-0.139762	0.0190482	1.5217	0.0633696	0.175891	0.0504309	-0.485508	0		0.0595921	0.119801	-0.139762	-0.0292704	1.59737	-0.047856	0.11493	-0.14842	-0.524729	0		0.138999	-0.0953102	0.126294	-0.0284379
	KIR_Inhibiting_Subgroup_2	0.00873368	0.682381	1.93341	-0.712565	-0.537452	-0.0676586	-0.333101	0.180884	-0.524729	0		-0.0727594	-0.0455007	-0.0175443	-0.64619	0.0401417	-0.0676586	-0.287063	0.289835	-0.45707	0		-0.131028	-0.627785	-0.139762	0.0190482	-0.0179342	0.0633696	-0.0935559	0.0504309	-0.485508	0		0.0595921	-0.0823793	-0.139762	-0.722418	-0.175237	-0.047856	0.0207192	-0.14842	-0.524729	0		0.138999	-0.624704	-0.566853	-0.0284379
	CD6	-0.772479	-0.00913248	-0.139762	-0.0194181	2.02287	-0.0676586	-0.279171	0.180884	-0.524729	0		0.363902	0.0531098	-0.0175443	0.046957	2.50553	-0.0676586	-0.906721	0.289835	-0.45707	0		-2.93119	-0.0953102	-0.139762	0.0190482	1.72098	0.0633696	0.686716	0.0504309	-0.485508	0		-0.437988	0.119801	-0.139762	-0.0292704	2.47148	-0.047856	-0.983682	-0.14842	-0.524729	0		-1.7464	-0.0953102	0.126294	-0.0284379
	CD247	0.00873368	-0.00913248	-1.15874	-0.0194181	0.076961	-1.34409	-0.0560895	0.180884	2.26213	0		-0.0727594	0.0531098	-1.72466	0.046957	0.198851	-2.63333	0.753331	0.289835	1.48483	0		0.294239	-0.0953102	-1.84688	0.712195	0.0198026	-0.557642	-0.921653	0.963438	1.91413	1.45161		0.0595921	0.119801	-1.84688	-0.0292704	1.93297	-0.124541	-1.67576	-0.14842	-0.524729	0.398776		0.138999	-0.0953102	0.126294	-0.802346
	KIR3DL1	-0.142939	0.0545126	0.0341164	0.896873	0.076961	-0.569268	-0.358934	0.180884	-0.58987	0.349376		0.293517	0.114508	0.112868	0.046957	0.198851	0.163453	0.154715	0.289835	-0.589017	-0.116588		-0.501026	0.307437	0.362064	1.40534	2.54239	0.572439	0.00982326	1.55086	0.0808429	-0.0744761		0.107795	-0.391059	-0.588283	-0.0292704	1.59737	-0.631729	-2.44903	-0.14842	-0.481613	0.129096		0.531502	-0.172934	0.126294	0.339287
	KLRK1	0.00916956	1.5304	0.882417	-1.81118	-1.52847	2.43866	-0.97125	-1.5223	-0.133142	0.947789		-0.502419	1.06554	0.189136	1.32346	0.542838	2.13679	1.00487	2.87304	1.38067	2.14593		-5.43449	-0.823968	-4.1218	-0.386417	0.662564	-0.526692	-1.6148	-1.65275	-2.06768	1.00063		-0.179861	0.294138	-0.016678	0.046957	1.32576	0.242977	-1.67576	-1.8516	-0.994982	0.398776		-1.10738	-0.173038	0.417149	-0.08555
	CD53	-0.122405	-0.316071	0.0848782	-0.894887	1.46326	-1.00927	-0.0402874	0.180884	-0.124946	0.371674		1.67053	-2.20105	-0.480838	-1.33628	4.63356	0.834823	-0.499049	1.79606	0.196696	-1.35154		-0.427558	0.0142115	0.00364631	0.0206193	0.0198026	0.0621157	-1.28946	0.963438	-0.162615	-0.506014		0.78758	0.936318	0.310033	-1.82103	0	-0.198744	-0.943052	-0.14842	-0.629935	-0.27879		1.30227	-1.17081	-1.66547	0.733702
	KLRG1	0.417093	-0.00913248	-0.139762	0.386047	0.076961	-1.6771	0.819441	0.180884	-0.524729	0		1.1773	0.0531098	-0.0175443	0.046957	0.198851	0.180763	0.191891	0.289835	-0.45707	0		1.68217	1.84055	-0.139762	0.0190482	1.5217	-0.852921	0.175891	1.2985	-0.485508	0		0.0595921	0.119801	0.486176	-0.0292704	0	-0.0439421	0.11493	-0.14842	-0.524729	0		0.138999	-0.0953102	0.126294	-1.63788
	CD3EAP	-0.0417309	0.146481	-0.318606	0.116507	0.192862	0.171681	-0.547207	-0.131611	-0.603928	-0.143435		0.223144	0.289931	-0.109368	0.122667	-0.144763	-0.0664661	-0.461012	-0.493387	-0.443494	-0.302682		0.496705	0.397339	0.0832581	-0.148652	0.41401	0.103157	0.663786	0.0747708	-0.39248	0.0141383		-0.0965659	0.0326609	-0.17347	0.158233	0.245559	-0.218312	-0.041745	-0.024599	-0.39961	-0.263252		0.700412	-0.0550542	0.207143	0.0134918
	KIR3DL3	1.71743	-0.00913248	-1.39377	-0.0194181	0.076961	-1.16627	-0.972319	0.723545	-0.524729	0		-0.0727594	0.0531098	-1.27155	0.046957	0.198851	-1.16627	-0.906721	1.18226	-0.45707	0		-0.131028	-0.0953102	-1.39377	0.0190482	2.45959	-1.03524	-0.922722	1.65858	-0.485508	0		0.0595921	0.119801	-1.39377	-0.0292704	0	-1.14647	-0.983682	-1.39872	-0.524729	0		0.138999	-0.0953102	0.126294	-1.12705
	NCR1	1.71743	-0.414598	-0.634803	-0.0194181	-0.680171	-0.0676586	-1.2584	0.653236	-0.524729	-0.398776		1.79759	0.340792	-1.89135	0.046957	-1.80728	1.62428	0.9482	1.08237	-0.45707	-0.398776		-0.131028	-0.500775	0.064622	1.11766	-2.56797	0.0633696	-1.2088	1.10091	-0.485508	0.601856		0.0595921	-0.285664	-0.47241	-0.0292704	-0.252583	1.90225	-1.26976	-2.16217	-0.524729	-0.398776		1.05376	-0.171472	1.51682	-0.0284379
	KIR_Activating_Subgroup_1	1.51763	-0.00913248	0.496006	0.205032	0.076961	-1.45395	-1.6644	0.180884	-0.341214	-0.840174		0.843531	0.0531098	-1.67784	-0.0392207	0.198851	0.403906	-0.275986	0.289835	-0.0199078	-0.434709		-0.131028	-0.0953102	-0.703114	-1.77271	0.0198026	0.0611742	-2.30795	0.0504309	1.18981	-2.00956		0.0595921	0.119801	-0.0772917	-0.906721	0.678034	-0.042966	-2.36891	-0.14842	0.722285	-2.00956		0.138999	-0.0953102	0.640503	-0.31612
	KLRB1	0.00873368	-0.00913248	-0.139762	-0.0194181	0.076961	-0.0676586	-1.48186	0.180884	-1.4422	0		-0.0727594	0.0531098	-0.0175443	0.046957	0.198851	-0.0676586	-1.41626	0.289835	-1.37454	0		-0.131028	-0.0953102	-0.139762	0.0190482	0.0198026	0.0633696	-1.43226	0.0504309	-1.40298	0		0.0595921	0.119801	-0.139762	-0.0292704	0.678034	-0.047856	-1.49323	-0.14842	-1.4422	0		0.138999	-0.0953102	0.126294	-0.0284379
	KIR_Activating_Subgroup_2	0.00873368	-0.00913248	-0.139762	-0.0194181	0.076961	-0.0676586	-0.972319	0.180884	-2.02946	0		-0.0727594	0.0531098	-0.0175443	0.046957	0.198851	-0.0676586	-0.906721	0.289835	-1.9618	0		-0.131028	-0.0953102	-0.139762	0.0190482	1.72098	0.0633696	0.175891	0.0504309	-1.99024	0		0.0595921	0.119801	-0.139762	-0.0292704	0.678034	-0.047856	-0.983682	-0.14842	-2.02946	1.08856		0.138999	-0.0953102	0.126294	-0.0284379
	KIR_Inhibiting_Subgroup_1	0.00873368	-2.02646	-0.371355	0.386047	0.880386	-0.387864	-0.301067	0.180884	-2.23001	-0.147661		-0.0727594	-1.96421	-2.5457	0.046957	-0.892579	-0.438722	-0.590636	0.289835	-0.780745	-1.23726		-0.131028	-0.0508479	-0.877831	1.96631	0.565339	-1.54607	-0.560872	2.64947	-2.19079	0.357456		0.0595921	-1.89752	-0.791515	1.21924	0.433347	-1.65729	-0.4924	-0.14842	-2.23001	-0.187244		0.138999	-0.0483066	0.823669	-1.63788
	CD8B	1.54246	0.237267	0.0414997	-0.140428	-0.159188	-2.55334	-1.48186	-1.06941	-0.830995	0.219566		0.516444	-1.37619	-0.690729	0.085777	0.459268	0.453328	1.11052	-0.960462	-0.852643	0.76906		0.482252	-0.350062	-0.908452	-1.15887	0.124065	-0.0260164	-1.43226	-1.19987	-0.68634	-0.904456		-0.853184	0.564786	0.0880197	0.423316	-0.567182	-1.14236	-1.49323	-1.39872	-0.544653	-1.90509		0.477895	0.369509	-0.48838	0.48209
		Log2(Treated/Ctrl)
		-4															4
		-4	-3.5	-3	-2.5	-2	-1.5	-1	-0.5	0	0.5	1	1.5	2	2.5	3	3.5	4
[truncated: 3 more columns]

## Sheet: 6-Cytokine genes
		Supplementary Table S4. Sheet #6. Modulation of immune-related genes belonging to 21 functional classes by epigenetic drugs. Ten melanoma cell lines were treated with the indicated drugs and then gene modulation was evaluated by the Nanostring Cancer immune panel. The 731 genes were grouped into the indicated functional classes (sheets 1 to 21 of this file). Extent of modulation is shown as Log2(…
		6-CYTOKINES AND RECEPTORS GENES
		GUADECITABINE											GIVINOSTAT											JQ1											GSK-126											ABEMACICLIB
	Gene symbol	VRG100	BRM17	FRN39	CST30	BNV13	MNT59	GRD43	GML41	CPN20	SLN91		VRG100	BRM17	FRN39	CST30	BNV13	MNT59	GRD43	GML41	CPN20	SLN91		VRG100	BRM17	FRN39	CST30	BNV13	MNT59	GRD43	GML41	CPN20	SLN91		VRG100	BRM17	FRN39	CST30	BNV13	MNT59	GRD43	GML41	CPN20	SLN91		VRG100	BRM17	CST30	MNT59
	IL11	1.51877	1.47162	4.86445	-0.0194181	2.47486	3.50018	2.47248	4.11412	2.14458	1.639		0.324947	1.17375	-0.0175443	0.046957	2.50553	-0.0676586	0.599048	4.79793	-0.45707	0		-0.519263	2.9237	-0.139762	0.0190482	3.66766	0.0633696	1.07042	2.57222	-0.485508	0		0.403243	0.49932	-0.139762	-0.0292704	2.2895	-0.047856	-2.08158	-0.14842	-0.524729	0		1.112	0.945871	0.126294	-0.0284379
	IL2RG	2.65374	2.07146	2.79834	2.65541	2.56187	2.13897	3.21682	0.180884	2.98293	2.33311		0.0639645	0.0531098	-0.0175443	0.046957	0.198851	-0.760806	0.191891	0.289835	-0.45707	1.40854		-1.98997	1.53	0.95885	0.0190482	0.0198026	-0.629778	1.56219	0.450416	-0.485508	0		-0.533438	0.119801	-0.139762	0.885038	0	-0.042966	0.11493	-0.14842	-0.524729	0		-0.596239	1.08334	0.126294	0.377027
	IL24	1.43652	2.5976	2.78951	1.57995	2.02287	1.8101	3.5373	2.18739	1.88991	0.950951		-1.32301	1.1691	0.390436	-2.15027	2.97553	0.314523	-1.7531	0.472528	1.40752	-2.07944		-0.262867	0.670762	-3.49195	-0.230919	1.88858	-1.32694	-1.7691	-0.109864	-1.70342	-1.53008		-1.19066	0.703549	0.687193	-1.82434	2.06686	0.0127417	-0.324084	-0.293032	0.0893456	-1.79399		-1.11125	-0.394175	0.129115	-1.29878
	IL13RA2	0.783753	-0.929053	4.18937	0.345922	0.845791	5.54027	0.0209465	1.83804	5.72285	0.00625751		0.966105	-0.866811	-1.72466	1.58363	1.17599	2.44438	-0.23703	-1.58064	3.00516	0.381951		-1.10962	-1.01523	-0.237441	-0.537933	-1.98795	2.25864	-2.12605	0.190478	-0.485508	-1.10223		-0.342198	-0.800119	0.481374	-0.0399196	-0.0331329	1.05402	-2.18701	-2.0189	1.97589	0.245872		0.0484735	-1.01523	-0.383539	2.36946
	IL1B	0.00873368	1.27094	5.75373	3.25884	1.10568	1.04665	1.07248	0.759219	3.81741	0		0.843531	0.863428	-0.0175443	4.51886	3.04163	0.0252952	1.05161	2.94738	0.924993	0		-0.131028	1.35257	1.46968	0.0190482	0.340078	-1.42626	-1.55491	-1.19354	-2.92863	0		0.0595921	0.23038	-0.139762	-0.0292704	0.408141	0.0768382	-0.688107	-0.778834	-0.110802	0		0.138999	-0.537827	0.126294	-1.2655
	IL2RB	1.62495	2.07146	2.89855	1.90954	0.565046	3.44746	0.830725	2.74694	0.969281	1.00661		1.49989	1.99779	-0.0175443	1.68131	0.601589	-0.0676586	0.366606	0.289835	-0.298644	-0.402027		-3.19622	-0.0953102	-0.139762	0.426084	-0.742873	0.0633696	-3.62992	0.0504309	-2.62592	-3.26308		0.460393	1.37487	2.09347	0.596032	-0.240092	-0.047856	-0.827208	-0.14842	0.722632	0.331759		-0.324353	1.53393	0.130522	-0.0284379
	IL17B	-0.0178185	2.02	3.86119	1.01633	3.07316	-0.0676586	1.8972	0.180884	1.66078	2.39334		0.159294	0.835526	-0.0175443	0.326975	0.198851	-0.0676586	0.441432	0.289835	-0.530471	1.40854		-1.99858	-0.474813	1.24653	-1.98227	2.9872	0.0633696	-0.198001	3.11466	-0.889446	2.09802		0.097075	0.447293	1.17665	-0.0923105	1.93297	-0.047856	-0.950552	-0.14842	-1.58068	0		1.21278	-0.172655	-0.920609	-0.0284379
	IL18	0.688298	0.147086	1.82205	0.19116	2.84041	2.60211	1.65796	1.3499	2.6022	0.653926		0.279631	0.104847	0.166779	0.0655045	0.843144	0.462316	0.556288	0.0883492	0.394503	0.0651841		0.245526	-0.0690662	0.278274	-0.22057	0.565339	-0.0566088	0.930464	0.549583	0.554133	-0.23925		0.137549	-0.186849	-0.403264	-0.207375	0.738424	0.156373	-1.96371	-0.144956	0.240665	0.289976		0.817739	0.200577	-0.111104	0.339287
	IL10	2.216	-0.00913248	2.58083	0.386047	1.17557	3.56941	2.20503	0.509231	1.67472	0		1.54129	0.0531098	0.672709	0.046957	0.198851	2.22373	0.191891	0.947923	-0.45707	0.620576		-0.530628	-0.0953102	-0.548121	0.0190482	0.932164	-2.07725	0.175891	1.41477	-0.485508	0		-0.340008	0.119801	0.768287	-0.0292704	2.1838	-0.169655	0.11493	-2.0189	-0.524729	0.398776		0.142316	1.84487	0.126294	-1.07044
	IL17RB	0.00873368	1.26469	2.41901	2.20626	0.13811	1.70814	0.572704	0.180884	1.73846	3.11574		-0.0727594	1.05638	-0.0175443	-0.64619	0.415112	-0.760806	-0.438897	0.289835	0.599544	0		-0.131028	2.05493	-0.139762	-0.674099	0.436692	-0.629778	-2.5959	0.0504309	-1.99024	0		0.0595921	-0.879293	-0.139762	0.778354	0.0568041	1.34211	-0.783737	1.06054	-0.782431	0		0.138999	0.0179674	-0.566853	-0.721585
	IL1A	2.81604	1.25045	1.93341	1.85389	0.076961	-0.0676586	0.546826	0.180884	4.33477	0		3.03908	1.06622	-0.0175443	2.78809	0.198851	-0.0676586	1.04838	3.09612	1.84177	0		-0.131028	0.909874	-0.139762	0.0190482	2.03209	0.0633696	-1.83072	0.0504309	-0.485508	0		0.0595921	-0.0372839	-0.139762	-0.0292704	1.37372	-0.047856	-4.0889	-0.14842	-0.524729	0		1.39067	-1.23625	0.126294	-0.0284379
	IL32	0.359348	1.43042	1.64531	-0.0194181	0.701007	1.94056	0.622326	0.608749	2.63014	1.83754		1.39224	0.692363	-0.0175443	0.046957	-0.641424	0.0148426	0.108	-0.0821897	-0.45707	-0.445451		-2.55043	2.68126	-0.139762	0.0190482	4.02207	-1.54607	-4.02794	-3.18656	2.08092	-0.653779		0.0273026	0.11992	-0.139762	-0.0292704	-0.856426	1.17937	-2.21578	-0.459025	-0.524729	-1.65441		0.815627	-0.333342	0.126294	0.559349
	CSF2	2.36383	0.539903	1.46366	-0.0194181	0.076961	-0.0676586	2.20503	0.180884	3.06711	0.362905		0.843531	-0.0195366	-0.0175443	0.046957	0.198851	-0.0676586	2.02553	0.289835	0.483427	0.402484		-0.131028	1.84302	-0.139762	0.0190482	3.36695	0.756517	-0.517257	0.0504309	-1.73912	-0.806476		2.13903	-1.89752	-0.139762	-0.0292704	1.77834	-0.047856	-0.578217	-0.14842	-1.77834	-0.806476		3.10883	-0.684718	0.126294	1.35786
	IL22RA2	1.88387	-0.381368	0.831484	1.30364	0.641589	-1.00927	1.91711	1.26316	2.08018	1.01671		1.63027	-1.9304	-0.425904	0.271934	-1.18243	-2.01357	1.69656	1.35323	1.33157	1.06128		-0.131028	-1.14665	0.991609	1.11923	0.339697	-1.88254	2.25533	1.25826	0.207639	-1.31641		1.85135	-0.849176	-0.617114	0.526093	0.216084	-0.602582	0.522298	0.472921	-0.524729	0.584206		1.84305	-0.707636	2.14458	0.328237
	IL4R	0.216637	1.89442	2.62352	0.164	0.0621829	0.827303	1.44091	0.505536	1.74389	0.0466332		-0.573205	0.820154	-1.52452	0.163733	0.307775	0.382231	0.570932	0.626142	1.27595	-0.00238028		-1.65773	1.48426	-0.953587	-1.29713	0.0293952	-0.719041	-1.7973	-0.869078	0.000171394	-0.946518		-0.181726	0.607074	0.76918	0.176548	7.06549e-05	0.109633	-0.151955	0.105781	0.844895	0.124724		-0.432443	-0.365756	-0.291932	-0.591687
	IL23A	1.79418	0.683496	0.482024	0.0801733	0.352578	1.14323	1.48448	1.3646	1.23903	0.614798		-0.282852	0.682417	-0.116404	-0.128773	-0.163783	0.294462	1.19502	1.05629	-0.639963	-0.327707		-0.260857	1.68208	-0.643906	-0.0401266	-0.10667	0.452022	0.687429	0.958505	-0.502616	-0.104829		-0.342412	1.04827	-0.306434	-0.208815	0.313338	-0.615043	0.593945	0.0151778	0.010908	0.0130721		-0.390769	0.289814	-0.218274	-0.072859
	STAT4	0.946939	-0.00913248	2.49285	1.85389	0.775121	-0.0676586	2.69081	0.180884	0.47222	-0.144134		0.307445	0.0531098	-0.0175443	0.046957	0.612057	-0.0676586	1.10924	0.697448	-0.45707	0.556735		-2.00013	0.233994	-0.139762	0.0190482	0.244029	0.0633696	0.175891	0.0504309	-0.485508	-0.398776		-1.80951	2.13685	0.486176	2.57011	1.60137	-0.047856	0.11493	-0.14842	-0.524729	0		-1.32718	1.33261	2.20891	-0.0284379
	IL8	0.11119	0.744279	2.37689	0.517179	0.31	0.954592	0.668485	0.385167	2.54551	0.172812		0.715729	0.946944	0.512881	1.45993	1.72545	0.52258	1.63107	2.99957	1.81396	-0.0925337		-2.23629	2.77856	1.86255	-2.34666	3.35365	1.41241	-0.514322	0.233571	2.05701	-0.605055		-0.361567	0.140313	-0.348821	-0.0849832	0.0557422	-0.24369	-1.03865	-0.299712	0.376609	-0.373094		-0.085982	-0.860569	-0.145804	0.128079
	LIF	0.745128	0.160993	1.40418	0.148575	0.00720811	0.69289	0.501682	1.61597	2.58602	-0.216172		0.587309	-0.0336854	0.214814	0.72178	0.238479	0.0784807	0.204552	2.32719	0.884828	-0.242625		-2.66834	-0.167214	-1.7399	-2.95605	0.562679	-1.8778	-1.36324	-0.960853	-1.01856	-4.59053		-0.1797	-0.0414929	0.278279	-0.0206585	0.319663	0.151351	-0.381579	-0.0841539	0.54751	0.350369		0.738391	0.26858	-0.50688	-0.816057
	IL15RA	0.824414	0.756503	0.37298	1.85389	0.076961	0.0593875	0.221731	0.180884	1.12541	2.04511		-0.430681	0.456869	-0.663455	2.90942	0.896088	-0.551823	1.08959	2.54418	0.868105	0.955511		-0.963712	-0.272244	-2.39334	0.0190482	3.64126	-1.83715	-0.516615	0.450416	1.05611	0		-1.13513	0.460651	0.176215	2.40919	1.37372	-2.34602	-2.18701	0.722873	0.135009	0.398776		-3.13516	-0.143165	2.07583	-1.4152
	IL6	0.00873368	1.12184	1.239	0.896873	-0.0652575	2.83211	0.0926626	-0.110721	1.16321	0.226172		-0.0727594	0.808232	-0.0175443	0.046957	0.260807	0.83656	0.674039	0.398933	-2.32933	0.223144		-0.131028	0.416477	-0.139762	0.0190482	-0.907248	0.0633696	-3.22445	-4.23149	-2.35777	-3.67782		0.0595921	0.491151	-0.139762	-0.0292704	-0.109155	1.05402	-2.36798	-0.292139	-2.39699	-0.0431313		1.05376	-0.0465103	0.126294	1.07017
	IL22RA1	0.00873368	0.402909	2.25175	-0.231319	0.544644	1.9161	-0.170682	0.458833	2.14364	0		-0.0727594	1.09525	-0.0175443	0.681608	1.41728	-0.0676586	0.695832	1.1269	0.365253	0		-0.131028	0.360818	-0.139762	-2.54516	0.106424	1.67105	-2.27999	-2.14881	-1.73912	0		0.0595921	0.390985	-0.139762	-1.34497	0.293869	-0.047856	0.0932751	0.0378059	0.386135	0		0.138999	-0.843811	-2.43792	1.07017
	CSF3R	0.0158733	1.37945	2.62656	-0.0194181	0.076961	-0.0676586	2.20503	0.180884	-0.524729	1.16938		2.56125	0.0531098	-0.0175443	0.046957	0.198851	-0.0676586	0.191891	0.289835	-0.45707	0		-1.83258	-0.0953102	-0.139762	0.0190482	0.0198026	0.0633696	0.175891	0.0504309	-0.485508	0		1.30291	0.119801	-0.139762	-0.0292704	1.77834	-0.047856	0.11493	-0.14842	-0.524729	0		-0.647791	0.746257	0.126294	1.07017
	IRAK2	1.15119	1.00491	1.65861	0.17285	0.208007	0.430929	0.514241	0.941068	0.652821	0.298537		0.181871	0.199658	-0.243981	0.0926152	0.473627	0.39421	0.587286	-1.72392	-0.796755	0.416593		0.298545	0.712443	0.595351	-0.321765	0.747866	-0.696364	-1.92046	0.475455	-0.984529	-0.723872		-0.230007	-0.142783	0.0686013	0.0665205	-0.0712185	-0.871331	-0.575927	-2.16217	-0.456322	0.251783		0.0631102	0.00209274	-0.225971	-0.0284295
	IL1R1	0.12794	0.47687	1.93341	0.283576	0.405859	2.03403	1.08803	-0.735407	0.629636	0.546779		0.0694366	0.49157	-0.0175443	0.381547	1.31583	2.44438	0.231597	3.02696	0.139261	-0.806476		-3.12924	-0.514342	-0.139762	-1.03458	0.493477	1.85367	-2.38807	-0.86586	-1.52122	-0.806476		0.24523	0.337975	1.583	0.121821	0.226448	-0.047856	-0.575913	-1.06471	-0.369873	-0.806476		-0.316826	-0.370589	-0.526724	0.664709
	IL18R1	2.02769	0.819688	-0.139762	1.23334	1.46326	0.987693	0.126294	-0.236988	0.47222	0		-0.0727594	1.42363	-0.0175443	0.046957	1.58924	0.193225	0.191891	0.335681	0.638422	0		-0.131028	-1.49308	-0.139762	0.0190482	0.0198026	-0.834856	0.175891	-2.35729	-0.485508	0		0.0595921	0.640246	1.4014	-0.0292704	1.93297	-0.19866	0.11493	-0.20206	-0.524729	0		0.138999	0.00485331	0.126294	-0.486342
	IL1R2	1.71743	-0.00913248	0.548373	1.30364	-1.01831	0.531178	1.7346	0.180884	0.0630581	1.5063		2.45146	0.0531098	-0.0175443	2.46753	-0.896423	-0.0676586	0.191891	0.289835	0.638422	0.113329		1.54794	0.741937	-0.139762	0.0190482	1.06229	0.0633696	0.175891	0.0504309	-0.485508	0		2.25682	0.525266	1.73665	-0.320258	-0.0100841	-0.047856	0.11493	0.216223	-0.524729	0		1.39067	-0.0953102	1.51576	1.581
	IL7R	-0.132498	1.09253	1.64531	-0.0194181	0.0180522	-0.0676586	2.83359	0.180884	0.981569	0		-0.198706	3.54883	-0.0175443	0.046957	0.654077	0.324383	2.86695	0.289835	2.37284	0		-4.70555	-0.0953102	-0.139762	0.0190482	-2.34231	0.0633696	0.175891	0.0504309	-0.485508	0		-0.0496116	0.525266	-0.139762	-0.0292704	0.515213	-0.047856	0.11493	-0.14842	-0.524729	0		0.236524	1.96902	0.126294	1.35786
	JAK3	0.395023	0.855336	2.098	1.34746	0.0531148	-0.0994499	0.144523	0.197656	1.06308	0.349038		-0.893915	0.328337	0.672429	0.680885	0.480926	0.0913959	0.699861	1.08189	2.17751	0.905322		-0.389535	0.0503696	-0.748266	-0.161501	0.500784	-1.34741	-1.05804	-0.487489	-1.73912	-3.03975		0.106507	0.223363	0.162677	0.107539	-0.305546	0.323217	0.0755192	0.102914	0.722279	0.352071		-0.177458	-2.1432	-0.706059	-0.467888
	IL26	0.971099	-0.415186	0.882389	0.175891	2.27419	0.531178	-0.0809787	-0.0721814	0.47222	1.639		0.717496	-1.96421	0.450722	-0.980829	0.198851	1.17072	0.338875	0.830605	-0.45707	0		-1.0438	-1.27539	-1.05779	-0.82825	0.0198026	0.0633696	-0.293311	0.848411	-0.485508	0		0.245429	-0.642459	-1.05779	-1.06087	1.08519	-0.047856	-0.950552	-1.22746	1.12777	0		1.36584	-2.11263	-0.718183	-0.0284379
	IL15	-0.323325	1.37945	0.0203302	1.30364	0.358089	-0.783298	0.358347	2.26212	0.840399	0.689532		0.789357	2.5373	-0.580729	0.271934	0.448367	0.215065	0.256878	3.86218	1.05428	0.499838		-0.776497	2.42882	-0.568776	-0.674099	0.244646	0.440292	0.132275	3.11466	-1.36691	-0.385056		-0.00528207	1.62567	-0.0426828	-0.722418	0.158447	-0.530413	0.296015	1.82288	0.029337	-0.171657		-0.303863	1.08334	0.53458	-0.109199
	SPP1	-0.455695	0.143279	-0.131674	0.0779705	0.524307	0.961471	0.647235	1.64084	1.53822	0.903993		0.054179	-0.19508	0.150986	0.947612	2.061	1.38132	2.01864	3.23615	2.95358	0.743155		-1.71617	-1.81198	0.24118	-0.751924	0.24049	0.398669	0.0841792	0.170504	3.00143	0.0181977		-0.0233689	0.846346	0.0958384	0.100183	0.175808	0.344311	0.110843	0.162062	0.431989	0.245903		0.329305	-0.0444036	0.0661624	-0.442534
	IL10RA	-1.08116	0.380983	2.2182	0.387792	0.487439	-1.16627	0.516128	3.14395	-0.541765	1.35325		0.717496	-1.69846	-0.425904	0.681608	2.80115	-0.262053	1.16557	4.67877	1.01219	0.955511		-2.14242	-0.0158986	-0.548121	0.982309	3.01459	0.0604414	-0.46982	2.99084	-2.19079	0		-1.9518	-0.0710793	1.68511	0.00590408	1.65006	-0.448431	-2.52131	1.10625	-1.67613	0.802002		-1.87239	0.187827	0.204164	-0.0284379
	IL13	2.26414	1.19667	1.64357	-0.712565	0.076961	0.172932	-2.07022	1.31219	0.164944	1.24022		-0.0727594	-0.352355	0.672094	0.607883	0.198851	0.180763	-2.00462	1.90354	0.178058	-0.398776		1.79904	1.94678	0.040822	-0.674099	1.26976	0.244228	-2.02062	1.5419	-0.655268	-0.250356		2.25682	-0.285664	0.818617	-0.320258	2.1838	-1.65729	-2.08158	-0.0238296	0.380669	1.50184		2.15339	0.340792	1.73912	0.664709
	IL12B	0.417093	1.37945	2.62656	-0.0194181	0.770108	-0.0676586	0.126294	0.180884	-0.524729	0		-0.0727594	2.99664	-0.0175443	0.046957	0.198851	0.324383	0.191891	0.289835	-0.45707	0.955511		-0.131028	1.69811	-0.139762	0.0190482	0.0198026	0.0633696	0.175891	0.0504309	-0.485508	0		0.0595921	2.72488	-0.139762	-0.0292704	1.77834	-0.047856	0.11493	-0.14842	-0.524729	0		0.138999	-0.0953102	0.126294	1.91747
	IL1RL2	2.15237	0.769254	-0.139762	0.386047	0.998264	-0.0676586	-0.566853	0.180884	0.981569	0		1.63027	0.742173	-0.0175443	0.046957	-0.489284	-0.0676586	-0.501256	0.289835	-0.45707	0		-0.131028	-0.00993386	-0.139762	0.0190482	1.34395	1.85367	-0.517257	0.0504309	-0.485508	0		0.0595921	-0.0823793	-0.139762	-0.0292704	0.397055	-0.047856	-0.578217	-0.14842	-0.524729	0		0.138999	-0.961791	0.126294	-0.0284379
	CSF1	0.376697	0.38644	0.253463	0.216694	0.157175	0.701095	-0.0106947	0.753975	0.855367	0.47871		0.486896	-0.132247	-0.123285	0.424237	-0.0362423	-0.839157	-1.05705	-0.409381	-1.07068	-0.0132353		-2.60083	0.840789	-2.41095	-1.07406	0.261704	-0.719174	-1.87741	-1.36989	-2.3559	-3.6966		0.259661	0.350899	0.193313	-2.57576e-05	-0.186442	-0.226897	-0.232066	-0.32566	-0.200341	0.196037		-0.0854083	-0.280037	-0.0627954	-0.373385
	IL12RB1	1.88387	0.528798	-0.410149	0.896873	0.701007	-0.0676586	0.126402	0.876619	-0.524729	0.141314		2.06508	0.876476	0.505739	1.55205	0.746232	1.17072	-0.047874	1.47752	-0.45707	-0.693147		-0.131028	-1.02376	-1.32042	0.0190482	-1.00945	0.0633696	-0.159665	1.34698	1.12585	-0.806476		0.0595921	0.967135	-0.697161	-0.0292704	0.529868	-0.047856	-1.83006	0.236631	-0.524729	-0.806476		1.39067	-0.5091	0.126294	1.35786
	IL12A	-0.548805	0.84623	0.534518	-0.0844257	0.0105687	0.0016802	1.24123	1.0106	0.566158	-0.0820016		0.959644	-2.08909	0.171574	0.553597	0.405042	0.0753751	0.44077	0.705001	0.827572	0.282551		-2.24819	0.487066	-2.43467	-2.64834	0.0937446	-1.45273	-1.45746	0.323822	-3.55397	-4.19615		-0.77809	0.505904	0.268573	-0.153167	0.00311329	-0.522478	-0.43928	0.0358095	0.118425	0.017755		1.17253	-0.0616257	-0.0784327	-0.385212
	CSF3	1.26522	-0.0640297	0.952161	-0.0194181	0.076961	-0.0676586	0.531759	0.180884	-0.523166	0.954478		1.1773	0.842652	-0.0175443	1.91946	0.198851	-0.0676586	-0.501256	0.289835	-1.9618	-0.285447		1.21184	-0.176992	-0.139762	0.0190482	0.425268	0.0633696	-0.517257	0.0504309	-1.99024	-0.398776		0.752739	0.393949	-0.139762	0.372889	1.59737	-0.047856	-0.578217	-0.14842	-0.559287	-0.398776		0.541916	0.0179674	0.126294	-0.0284379
	IL34	0.31991	0.0151845	0.544633	0.755279	2.27419	-0.0676586	-0.204847	-0.410241	-0.823007	0.717962		0.813317	-1.4081	-0.338367	1.68948	0.198851	0.83656	-0.607892	-2.38253	-0.40338	-1.52438		-0.289117	-2.23767	-1.84688	1.81186	2.75811	0.0633696	-1.08895	-2.62193	-0.426563	-1.22999		-0.277694	-0.34358	-0.124112	0.740104	2.1838	-0.047856	-2.63038	-1.94949	-1.70579	-0.831235		-2.97139	-2.07648	0.418204	-0.0284379
	EBI3	1.11543	-0.00913248	-0.139762	-0.0194181	0.711199	0.936643	0.127898	0.180884	0.47222	-0.398776		-1.57293	0.0531098	1.08107	2.78809	1.52944	-0.0676586	-1.1928	0.289835	-0.45707	0.810184		-0.512784	0.233994	-0.139762	0.0190482	1.2567	1.85367	-1.2088	0.0504309	0.207639	-0.398776		-1.44058	1.03931	2.27615	1.67277	0.109373	-0.047856	-1.26976	-0.14842	-0.524729	-0.398776		-0.958255	0.233994	0.126294	-0.0284379
	IL17A	0.00873368	-2.3631	2.49285	2.23291	1.46326	-0.0676586	0.126294	0.180884	-1.77834	0.546367		-0.0727594	-2.30086	1.08107	1.30103	0.198851	1.7902	0.191891	0.289835	-1.71068	0.0569723		1.39503	-2.44928	0.95885	1.81238	0.0198026	1.15905	1.78533	0.0504309	-1.73912	0.485379		0.752739	-1.31466	-0.139762	-0.0292704	0	-0.047856	0.11493	-0.14842	-1.77834	-0.00503779		0.138999	-0.5091	0.126294	-0.0284379
	IL19	0.417093	-0.00913248	-0.139762	-0.0194181	1.46326	0.936643	-0.095567	0.180884	0.0630581	0		-0.0727594	0.0531098	-0.0175443	0.046957	0.896088	-0.0676586	-0.498916	0.289835	-0.45707	0		-0.131028	-0.0953102	-0.139762	0.0190482	0.0198026	0.0633696	-1.43226	1.55086	0.207639	0.662688		0.0595921	0.119801	0.486176	-0.0292704	1.93297	-0.047856	-1.49323	-0.14842	-0.524729	0		0.138999	-0.0953102	0.126294	-0.0284379
	OSM	1.2396	0.278059	1.46366	-0.712565	-1.52847	-1.6771	0.280706	-0.193733	2.14458	1.16938		0.884815	-0.354373	-0.0175443	-2.15027	-1.40658	-1.6771	0.106429	0.0344276	-0.45707	0		-1.0438	-0.425832	-0.139762	-1.07956	-1.18016	-1.54607	-1.6148	0.299209	-0.485508	0		-0.853184	0.967382	-0.139762	0.21197	-0.927396	0.425817	-1.26839	-1.80018	-0.524729	0		-0.773777	-1.2721	-2.07093	-0.0284379
	IL4	0.417093	0.68273	0.426438	1.48466	0.076961	-0.387864	-0.972319	-0.731862	0.0647846	1.35325		-0.0727594	-1.20225	-1.52452	2.39877	1.30019	-1.6771	-0.906721	0.530425	-0.864505	0		1.68217	-0.51342	-1.64673	0.0190482	1.26976	-1.54607	-0.922722	0.836056	-0.199796	0		0.0595921	-1.13556	-0.330325	2.49289	1.93297	-1.65729	0.269897	-2.16217	-0.932164	0.398776		0.138999	0.278573	1.51682	-0.539264
	IL3RA	1.473	0.684015	0.0848782	-0.160544	2.27419	2.03403	-0.738735	0.180884	-3.12808	-0.330242		0.46247	0.0531098	-2.27112	1.18968	4.6571	2.83651	0.447771	2.8184	-1.96492	-0.784225		-2.26799	1.3302	-0.783902	-0.822443	3.52842	0.0633696	-2.76787	2.57222	-3.08885	0.710847		-2.07737	0.119801	-0.85218	0.157312	2.1838	-0.047856	-1.32285	-0.14842	-3.12808	-2.19277		-0.126752	-0.0953102	-1.06144	1.76332
	IL2RA	0.00873368	-0.00913248	1.64531	-0.0194181	0.076961	-0.0676586	0.126294	0.180884	-0.524729	0.947789		-0.0727594	0.0531098	-0.0175443	0.046957	1.30019	-0.0676586	1.10924	0.289835	-0.45707	0		-0.131028	-0.0953102	0.553385	1.63037	0.0198026	2.00803	0.175891	0.0504309	1.12585	2.09802		0.0595921	0.119801	-0.139762	-0.0292704	1.08519	-0.047856	0.11493	-0.14842	-0.524729	0.398776		1.39067	1.96902	0.126294	1.07017
	IL21R	0.0777011	-0.00913248	-0.139762	2.23291	-0.47183	1.22157	-0.566853	0.180884	-0.932164	0.141314		-0.69512	0.0531098	-0.0175443	3.36131	1.60805	3.75815	-0.501256	3.31293	-0.864505	1.86767		-4.26324	-0.0953102	-0.139762	0.0190482	-1.641	0.0633696	-0.517257	0.0504309	-0.892943	-0.806476		0.370417	0.119801	-0.139762	1.4715	0.385519	2.03526	-0.578217	-0.14842	-0.932164	2.33032		-0.925696	-0.0953102	0.126294	1.07017
	IL27	0.00873368	-0.00913248	-0.139762	-0.0194181	2.1564	-0.0676586	0.126294	0.180884	-0.524729	0		-0.0727594	0.0531098	-0.0175443	0.046957	0.198851	-0.0676586	0.191891	0.289835	-0.45707	0		-0.131028	-0.0953102	-0.139762	0.0190482	0.0198026	0.0633696	0.175891	0.0504309	-0.485508	0		0.0595921	0.119801	-0.139762	-0.0292704	0	-0.047856	0.11493	-0.14842	-0.524729	0		0.138999	-0.0953102	0.126294	-0.0284379
	STAT1	0.297663	-0.0244628	0.0932443	0.0372268	0.17076	0.116882	0.248184	0.0939868	0.499626	0.0473438		0.170665	-0.0499061	-0.0286768	-0.0572807	-0.449233	0.0143198	-0.0984402	0.0481811	0.0646311	-0.0369602		0.366665	-0.00213514	0.402036	0.128803	-0.326839	-0.0584714	-0.200216	-1.02817	0.0015051	0.19874		0.00633257	0.137893	-0.0498857	-0.119602	-0.00335531	0.0362329	0.092228	-0.0815302	0.17735	0.0134562		0.0874252	-0.0201917	-0.00707273	-0.0417552
	IL13RA1	-0.0250148	0.44239	0.172666	0.0270863	-0.124298	0.310691	-0.0212937	0.163986	0.289473	0.204677		-0.368941	0.0328341	-0.0429089	0.122195	0.194723	-0.0131025	-0.14636	0.20588	0.102448	0.0608141		-1.04749	-0.238574	-0.533938	-0.355952	0.00657614	-0.0428081	-0.483635	-0.115974	-0.148807	-0.27107		-0.141877	0.119134	0.0261855	-0.015723	-0.0421333	0.0875615	0.0598173	-0.0568115	-0.0530517	0.0306432		-0.0102475	-0.303556	-0.13879	0.158816
	STAT2	0.0927053	-0.207662	0.28731	-0.00530691	0.173545	0.288054	0.0131637	-0.030655	0.413678	0.282784		-0.221117	-0.26562	0.137509	-0.122493	-0.183639	0.141731	-0.28573	-0.466684	0.47954	0.31404		-0.813664	-0.348175	0.0945897	-0.064356	-0.677958	-0.0463563	-0.103406	-0.882791	0.527914	0.0371749		-0.027676	0.0534049	0.0379561	0.0537864	-0.0589018	0.0616343	0.226157	-0.0614577	0.372744	0.0863762		-0.107764	-0.234695	0.165783	0.264607
	CKLF	0.0871683	0.431339	0.0891153	0.04081	-0.0776113	0.260758	0.473568	0.0120898	-0.0304079	-0.0321412		0.0653919	0.273937	0.00758989	-0.0328965	0.0954952	0.330569	0.208651	-0.00768225	-0.472777	-0.108641		-0.353441	0.0381028	-0.169362	0.330072	0.0236894	0.167945	0.111	-0.241638	-0.891143	-0.00816592		0.0232556	-0.080894	-0.111816	-0.0489174	0.0296241	-0.0436593	0.21822	-0.0858874	-0.394639	0.109925		-0.137313	0.0867194	-0.137986	-0.197245
	IL17RA	0.0387734	0.041683	0.0914151	0.0159711	0.0567218	-0.063144	0.167496	0.181119	0.62132	0.0427735		-0.085639	0.203285	-0.0365619	0.0840764	0.20307	-0.0745281	0.25606	0.413035	0.574105	0.0509679		-0.668711	-0.337661	-0.41139	-0.260351	-0.1112	-0.144985	-0.407591	-0.385383	0.206078	-0.466365		0.0356405	0.0801513	-0.21747	-0.000908455	-0.0367124	-0.100501	0.129441	0.0447985	0.563023	0.0234999		0.0248783	0.127292	0.0936645	-0.0694939
	STAT3	0.0429092	0.208083	0.259263	0.0291302	0.0737857	0.133276	0.0599806	0.0537766	-0.067251	0.334089		-0.248016	-0.0504287	0.0803621	0.0577002	0.236448	0.07159	0.216936	0.3391	-0.500507	0.173262		-0.142429	0.222319	0.0737598	-0.274298	0.0260078	0.124566	0.292348	-0.329762	-0.261441	0.415127		-0.0293262	0.0293575	-0.0401882	0.0214605	0.0221785	0.212818	-0.14411	-0.0109318	-0.427859	0.0776562		0.0196432	-0.338477	0.0270706	0.136871
	IL18RAP	0.00873368	-1.51523	-0.139762	-0.0194181	0.076961	3.54999	-0.566853	0.180884	-0.524729	0		-0.0727594	0.491692	-0.0175443	0.046957	0.198851	-0.0676586	-0.501256	0.289835	-0.45707	0		-0.131028	-1.60141	-0.139762	0.0190482	0.0198026	0.0633696	-0.517257	0.0504309	-0.485508	0		0.0595921	0.867541	-0.139762	-0.0292704	2.1838	-0.047856	-0.578217	-0.14842	-0.524729	0		0.138999	-0.422751	0.126294	-0.0284379
	IL23R	0.00873368	-0.00913248	1.239	-0.0194181	0.076961	-0.0676586	0.126294	0.180884	-0.524729	0		-0.0727594	0.0531098	-0.0175443	0.046957	0.198851	-0.0676586	0.191891	0.289835	-0.45707	0.955511		-0.131028	-0.0953102	-0.139762	0.0190482	0.0198026	0.0633696	0.175891	0.0504309	-0.485508	0		0.0595921	0.119801	-0.139762	-0.0292704	1.59737	-0.047856	0.11493	-0.14842	-0.524729	0		0.138999	0.233994	0.126294	1.35786
	IL5RA	1.62551	0.418455	0.845488	-0.656932	-0.057544	0.683757	-0.824473	-0.457716	-0.340927	-0.287488		2.16986	0.415676	0.319178	-0.0192469	0.116569	1.26207	-0.52251	0.294703	-0.866477	0.310427		1.39767	0.105571	0.157961	-0.0366514	-0.0933462	0.909414	-0.562902	0.76758	-0.722978	-0.571038		0.533111	0.676133	0.85948	-0.225686	0.152089	1.62979	-0.509805	0.299431	-1.52198	-0.367466		1.82806	0.208957	0.0530822	1.4379
	STAT6	0.288042	-0.0591408	0.30388	-0.0112021	0.0903947	0.29012	-0.0709762	-0.0666659	-0.195203	0.190152		0.0675854	-0.206385	0.09954	0.145204	0.0829919	0.0397605	-0.335427	-0.248911	-0.0874786	-0.0770311		-1.16609	-0.314927	-0.445458	-0.798649	-0.278613	-0.257804	-1.07304	-0.583881	-0.58458	-1.07717		0.0384719	0.0600752	0.0493961	0.243877	-0.00126092	0.0202083	0.110807	0.0333171	-0.122272	-0.077497		0.0316735	-0.381773	0.00350994	0.158938
	IRAK4	0.504813	-0.188309	0.116853	0.0383091	-0.00180468	-0.117031	0.166674	0.0832846	0.196185	-0.0426227		0.328711	-0.140038	0.0994216	0.0739491	0.0496076	-0.0596533	0.153861	0.0564785	0.410651	-0.0446218		0.130634	-0.0526152	-0.0606133	0.0633672	-0.0284413	-0.00249864	0.184869	-0.0389845	0.168567	-0.518715		0.399843	0.0131299	-0.0439427	0.0090084	-0.0643371	0.15647	0.123443	0.0319251	0.4281	-0.133805		0.128635	-0.0801207	0.0520731	-0.144598
	IL12RB2	-0.155607	-0.144407	-0.0299246	0.0784716	-0.0301831	-0.232672	0.0881605	-0.0999187	0.450151	0.794342		0.56917	0.393887	0.097736	0.494726	0.443391	0.0716205	0.046139	0.0208301	0.659832	0.435358		-1.77268	-1.61057	-2.41785	-0.884305	-0.388747	-1.22284	-1.68173	-1.05524	-1.0559	-2.37045		0.131468	0.0058039	0.105352	0.042833	-0.0973616	-0.0216259	0.407028	-0.0208363	0.373816	0.475015		-0.17012	-0.287146	-0.0959944	-0.249663
	IL6R	2.6156	-0.925808	-0.189195	0.238081	0.00271017	-0.419238	-0.30424	-0.0487669	-0.207446	-0.0965444		-0.0727594	0.0274317	-0.143263	0.237088	0.0963812	0.0902517	-0.431106	-0.52899	-0.449056	-0.235514		-0.131028	0.360818	-1.32814	-0.367152	-0.558508	-0.0981695	-1.16079	-1.20058	-0.69592	-1.12176		1.1582	0.0745397	0.00194037	-0.0145365	0.0689943	0.251447	0.0325837	-0.073969	0.228561	-0.190187		1.64223	0.693147	0.324257	0.0759305
	IL1RAPL2	-0.279355	-0.510826	0.423318	0.162291	0.0821576	0.2189	1.08265	0.180884	-0.827205	0.120698		-0.0713758	-0.808324	0.551152	-0.240058	1.13254	-0.347995	1.69807	2.43255	-0.659776	-0.0234569		-0.555879	-2.57212	-0.00946458	-0.438799	-0.511117	-0.162592	-1.43226	2.64947	-0.857367	-1.07872		-0.696522	-0.543402	0.422994	-0.431367	0.114233	0.542932	-0.575792	0.216223	-0.749177	-0.623983		-0.0451838	-0.235583	-0.249436	-0.0290608
	JAK1	0.112731	0.144284	0.255286	-0.00243277	0.0343237	0.23114	-0.0940492	0.0699522	-0.261915	0.153378		-0.139008	-0.107091	0.047288	-0.0775536	0.0786809	0.0230562	0.265752	0.199436	-0.229291	0.155477		0.184538	0.391734	0.648534	0.330558	0.357071	0.268335	0.298795	0.274109	0.135436	0.546186		0.0742544	0.0710176	-0.0207007	-0.0515991	0.00203208	0.063945	-0.0861228	0.0692843	-0.243171	0.123362		-0.177749	-0.122024	-0.262825	-0.183426
	CSF1R	0.00873368	-0.00913248	-0.139762	-0.0194181	0.076961	-0.760806	0.126294	0.180884	1.16352	0		-0.0727594	0.0531098	-0.0175443	0.046957	0.198851	-0.760806	0.191891	0.289835	-0.45707	0		-0.131028	1.3302	-0.139762	0.0190482	0.0198026	-0.629778	0.175891	0.0504309	-0.485508	0		0.0595921	0.119801	-0.139762	-0.0292704	0	-0.741003	0.11493	-0.14842	-0.524729	0		0.138999	-0.0953102	0.126294	-0.721585
	IL2	0.00873368	-0.00913248	0.548373	-0.0194181	0.076961	-0.0676586	0.126294	0.180884	-0.524729	0		-0.0727594	0.0531098	-0.0175443	0.046957	0.198851	-0.0676586	0.191891	0.289835	-0.45707	0		-0.131028	-0.0953102	-0.139762	0.0190482	1.5217	0.0633696	0.175891	0.0504309	-0.485508	0		0.0595921	0.119801	-0.139762	-0.0292704	0	-0.047856	0.11493	-0.14842	-0.524729	0		0.138999	-0.0953102	0.126294	-0.0284379
	IRAK1	-0.00744644	0.157868	0.178816	-0.0504353	0.101586	0.153955	0.0384927	0.0289427	-0.288618	-0.228658		-0.327018	0.0732383	-0.0753594	0.0532307	0.120394	-0.0173981	0.216372	0.0285729	-0.246096	-0.143614		-1.12028	-0.106348	-0.730408	-1.12033	-0.367522	-0.782777	-0.576644	-0.915208	-0.973622	-0.865772		-0.0484666	0.0166794	-0.0252835	-0.0146619	0.0298712	0.0290696	0.0940216	-0.0663146	-0.177975	-0.1377		0.143384	0.218751	-0.00924604	-0.186452
	IL5	0.00873368	-0.00913248	-0.139762	-0.0194181	0.076961	-0.0676586	0.126294	0.180884	-0.524729	0.254642		1.1773	0.0531098	-0.0175443	0.046957	0.198851	-0.0676586	0.191891	0.289835	0.924541	1.95445		-0.131028	-0.0953102	-0.139762	0.0190482	0.0198026	0.0633696	0.175891	0.0504309	0.616304	0		0.0595921	0.119801	-0.139762	-0.0292704	2.62612	-0.047856	0.11493	-0.14842	-0.524729	0.398776		0.138999	-0.0953102	0.126294	-0.0284379
	FLT3LG	0.680114	-0.104947	0.247576	0.132956	-0.137542	-0.288411	-0.251699	-0.37339	0.0466247	-0.0731969		1.23119	-0.0131938	0.362816	1.0513	0.617699	-0.108657	0.0222578	0.294289	-0.218731	0.772357		-2.57228	-1.42648	-4.14043	-3.80918	-1.88951	-1.5919	-2.38273	-2.47981	-3.13163	-2.96579		0.423452	-0.0710158	0.256113	0.320998	0.373446	0.121685	-0.143112	-0.153597	0.0976482	-0.623983		-1.26395	-0.27006	-0.563125	-1.2045
	IL6ST	-0.125233	0.115819	-0.148639	0.0529275	-0.0255901	-0.139757	-0.0614831	-0.103801	0.188897	0.0228203		-0.0576504	-0.0186283	0.0309338	-0.0039793	0.360225	0.185486	0.110783	0.523094	0.354758	0.164301		-0.296859	0.125703	-0.0557046	-0.133804	0.190032	0.188744	-0.0922448	-0.151604	-0.0128512	0.097919		-0.0182405	-0.00188548	-0.0771271	-0.0481835	-0.0552911	0.0109083	-0.101016	-0.0343647	0.0358031	0.163234		-0.306708	-0.326295	-0.167502	0.294768
	IL1RAP	-0.385296	0.0836258	0.0671363	0.213394	0.090601	-0.225781	-0.0125381	0.125174	0.203311	-0.390018		-0.215141	0.128214	0.0615029	0.115627	0.437787	0.0701062	0.294809	0.642913	-0.0845526	-0.0997645		-0.248945	-0.0384267	-0.753255	-0.0678196	-0.37656	-0.681509	-1.4832	-0.955501	-0.917336	-0.761856		-0.0282175	0.162195	0.0890413	0.0197937	0.0510351	-0.139935	-0.383033	-0.0814342	0.0332264	-0.0341307		0.0262613	-0.198422	0.236432	-0.480565
	IL21	0.00873368	-0.00913248	-0.139762	-0.0194181	0.076961	-0.0676586	0.126294	0.180884	-0.524729	0		-0.0727594	0.0531098	-0.0175443	0.046957	0.198851	-0.0676586	0.191891	0.289835	-0.45707	0		-0.131028	-0.0953102	-0.139762	1.11766	0.0198026	0.0633696	0.175891	0.0504309	-0.485508	0		0.0595921	0.119801	-0.139762	-0.0292704	0	-0.047856	0.11493	-0.14842	-0.524729	0		0.138999	-0.0953102	0.126294	-0.0284379
	IL9	0.00873368	-0.00913248	-0.139762	-0.0194181	0.076961	-0.0676586	0.126294	0.180884	-0.524729	0		-0.0727594	0.0531098	-0.0175443	0.046957	0.198851	-0.0676586	0.191891	0.289835	-0.45707	0		-0.131028	-0.0953102	-0.139762	0.0190482	0.0198026	0.0633696	0.175891	0.0504309	-0.485508	0		0.0595921	0.119801	-0.139762	-0.0292704	0	-0.047856	0.11493	-0.14842	-0.524729	0		0.138999	-0.0953102	0.126294	-0.0284379
	IL3	2.53828	-1.51523	1.64531	1.68711	-1.52847	-1.16627	1.22491	-2.41989	-0.524729	-0.551834		0.332706	-1.45299	-0.0175443	0.046957	-1.40658	-1.16627	0.191891	0.609446	-0.45707	-0.806476		1.39503	1.12317	-0.139762	0.0190482	-0.673266	0.0604414	0.175891	0.119842	0.616304	-0.806476		0.0595921	-1.38629	0.889857	-0.0292704	-0.231714	-0.448431	0.11493	-1.54023	-0.524729	-0.4077		0.138999	-1.2721	0.126294	0.482388
	CSF2RB	0.00873368	-0.00913248	-0.139762	-0.0194181	0.487439	-0.0676586	-0.566052	0.180884	-0.524729	0		-0.0727594	0.0531098	-0.0175443	0.046957	-1.18243	-0.0676586	-1.88675	0.289835	-0.45707	0		-0.131028	-0.0953102	-0.139762	0.0190482	-0.449118	0.756517	0.0431609	0.0504309	-0.485508	0		0.0595921	0.119801	-0.139762	-0.0292704	0.908218	-0.047856	-1.55634	-0.14842	-0.524729	0		0.138999	1.53393	0.126294	-0.0284379
	JAK2	-0.189177	-0.138401	-0.0371895	-0.0833566	-0.213358	-0.23226	0.0286228	-0.181193	-0.0588709	0.0593815		-0.105918	-0.0893621	0.0956864	0.102653	-0.190636	-0.152898	0.181875	0.0942985	0.279376	0.273885		-1.06571	0.105389	0.379585	0.571568	-0.333106	-0.1248	0.00776488	-0.0196144	-0.0576107	-0.225044		-0.00238454	0.135406	-0.00542053	0.0611135	0.00472697	-0.0374087	0.210034	-0.0556934	0.339627	0.0508535		-0.477187	-0.142254	0.120771	0.172938
	IL1RL1	0.217255	0.346782	0.679406	-0.400229	0.770108	-1.36594	-1.48186	0.47175	-0.524729	0.189889		0.297419	-1.20225	-1.27155	-2.35006	1.30019	-2.37024	0.0884011	-0.185616	-0.45707	0.258438		-0.288335	0.442758	-1.39377	-0.584642	2.54239	-0.855117	-1.43226	0.500077	0.207639	-1.16799		0.505331	-0.730091	-1.39377	-0.178654	0	-2.35044	-1.49323	-2.49815	1.12777	0.584206		0.778445	-0.172012	0.0352422	-2.33102
	IL1RN	0.00873368	-0.00913248	0.548373	-0.0194181	0.0819736	-1.16627	-0.566853	0.180884	-0.524729	0		-0.0727594	0.0531098	-0.0175443	0.046957	-0.489284	-1.16627	-0.501256	0.289835	-0.45707	0		-0.131028	-0.0953102	-0.139762	0.0190482	2.00311	-1.03524	0.869038	0.0504309	-0.485508	0		0.0595921	0.119801	0.486176	-0.0292704	0.909231	-1.14647	0.339216	-0.14842	-0.524729	0		0.138999	-0.0953102	0.126294	-1.12705
	GPI	-0.16379	-0.129436	-0.303469	-0.0564545	-0.259594	-0.474178	-0.0981672	0.0618495	0.000861036	-0.132297		-0.12507	0.150694	-0.0444267	-0.0260156	0.183075	0.0371095	0.631213	0.541144	0.35693	-0.156453		0.0898118	0.373479	-0.288203	-0.255296	0.0803739	0.0575782	0.172612	0.0413172	0.365877	-0.0567295		-0.0750136	-0.109828	-0.086591	0.0135417	-0.0574722	-0.143518	-0.351544	-0.0380202	0.38892	-0.153207		0.56367	-0.155437	0.139665	-0.0490865
	IL22	0.00873368	-0.00913248	-0.139762	-0.0194181	0.770108	-0.0676586	-1.95235	0.180884	-0.524729	0		-0.0727594	0.0531098	-0.0175443	0.046957	0.198851	-0.0676586	-1.88675	0.289835	-0.45707	0		-0.131028	-0.0953102	-0.139762	0.0190482	0.0198026	0.0633696	-1.90275	1.55086	-0.485508	0		0.0595921	0.119801	-0.139762	-0.0292704	0	0.650181	-1.96371	-0.14842	-0.524729	0		0.138999	-0.0953102	0.126294	-0.0284379
	STAT5B	-0.25963	-0.151504	-0.150064	-0.113336	0.0602045	-0.25928	-0.185563	-0.0857028	-0.450014	-0.183951		-0.104975	-0.124956	0.013532	-0.0928166	0.117008	-0.184543	-0.145246	-0.0661955	-0.308163	0.146126		-0.522448	-0.465818	-0.426044	-0.1543	-0.238571	-0.277593	-0.347091	-0.394385	-0.708766	-0.587787		0.0204253	0.0257652	-0.0879532	-0.161387	-0.0865092	0.018863	-0.0737702	-0.0601283	-0.220675	0.0859455		-0.265162	-0.18418	-0.371165	-0.301163
	IL25	1.26522	0.103981	-0.139762	-0.0194181	-1.70979	-0.0676586	-2.07022	-0.735407	0.0630581	1.5063		-0.0727594	-0.077687	-0.0175443	0.046957	-1.5879	-0.0676586	0.247506	-0.626456	0.638422	1.20896		-0.131028	-0.450742	-0.139762	1.63037	0.581626	1.85367	-2.02062	0.382208	-0.485508	0		0.0595921	0.196969	0.486176	1.21924	0.146223	-0.047856	-2.08158	-1.06471	-0.524729	0		0.138999	-2.29391	0.126294	-0.0284379
	IL16	0.436384	-0.406669	-0.181085	-0.344726	-0.179834	-0.402323	-0.192214	-0.347831	-0.588722	-0.0456309		0.00545343	-0.652421	0.0651744	-0.567346	-0.498411	-0.118366	-0.682998	-1.21667	-1.63648	0.186721		-4.38582	-0.826335	-3.77697	-3.72757	-3.55607	-1.12793	-3.56208	-2.35378	-4.17717	-4.57906		0.0348486	-0.0124346	-0.0879009	-0.015405	0.0400095	0.0635921	0.411073	-0.0192165	0.223242	0.168299		-1.04743	-0.893051	0.660055	-0.269421
	IL11RA	0.484772	-0.657069	-0.292523	-0.0237507	-0.162624	0.355995	-1.25893	0.0423242	-0.659317	-0.12925		1.06326	-0.265514	-0.0958469	-0.018589	0.207523	-0.152454	-2.29195	-0.0123506	-0.752205	0.146492		1.21962	0.00372903	0.194882	-0.176663	0.258721	-0.085507	-0.698509	-0.877513	-1.12807	0.0321443		0.160445	-0.132731	0.126509	-0.145442	-0.149605	0.231684	-2.36891	0.0636488	-0.614594	-0.157204		0.187573	-0.262878	0.311055	0.491273
	IL7	-0.605498	-0.469513	-0.525864	-0.0194181	-1.99747	-0.608454	1.51259	-0.3067	0.028479	0.0890187		-0.380468	0.100947	0.593042	0.046957	-1.87558	0.0274054	0.191891	-0.35227	-0.247002	-0.0818491		-1.97894	-0.60099	-0.232607	0.0190482	-2.05463	-1.03775	0.175891	-1.05044	-4.52032	-3.80198		0.0371499	0.178245	0.0173633	-0.0292704	0.310657	-0.340889	0.11493	-0.190462	-0.0831177	-0.248925		-0.470685	-0.0866891	0.126294	-1.12753
	MIF	-0.276247	-0.140879	-0.375553	-0.103223	-0.306735	-0.943827	-0.136231	-0.0294028	-0.27524	-0.356097		-0.042184	0.0443234	-0.0622326	-0.00685305	-0.0374551	-0.436793	0.229004	0.157501	-0.369543	-0.254898		-0.124722	-0.152084	-0.290807	0.120265	-0.234532	-0.224351	0.0607467	-0.0817446	0.0192363	0.0517624		-0.0415393	-0.100745	-0.165059	-0.101546	-0.0625327	-0.147641	-0.134083	0.00523067	-0.040322	-0.110149		0.448775	-0.42413	-0.146279	-0.369962
	IL17F	-0.637316	0.684015	-0.118769	-0.0194181	-1.01664	-0.64957	-1.07766	0.180884	-0.877556	0.499557		0.0598132	0.0531098	-0.0517915	1.91946	-1.58381	0.0269329	0.00128246	0.289835	-0.900972	1.10992		-1.58484	1.69811	0.0980785	0.0190482	-2.05463	0.540552	-2.81888	0.450416	-0.434553	-0.107935		0.0803435	0.119801	0.0295282	1.4715	-0.00841048	-1.22234	-0.863034	-0.14842	-0.116381	0.082943		0.292968	1.33261	0.126294	-0.109199
	SIGIRR	0.2037	0.127011	0.39585	-0.583511	0.0110861	-1.00927	0.187055	0.397207	-3.26614	-0.0337907		-0.193549	-3.57365	-0.0565957	-0.600902	-0.298846	-2.01357	0.577892	-2.0599	-3.19848	-0.419225		-3.90076	-0.523399	-0.178263	-1.97294	-0.787467	-0.786857	-0.398672	-1.89932	-2.12511	-0.438979		0.22201	0.17199	0.409841	-0.597718	-0.139962	-1.99377	-0.0526871	-2.49815	-2.30679	-0.825913		-0.317241	-0.777107	-0.322232	0.664709
		Log2(Treated/Ctrl)
		-4															4
		-4	-3.5	-3	-2.5	-2	-1.5	-1	-0.5	0	0.5	1	1.5	2	2.5	3	3.5	4
[truncated: 3 more columns]

## Sheet: 7-Immune lineage_different
		Supplementary Table S4. Sheet #7. Modulation of immune-related genes belonging to 21 functional classes by epigenetic drugs. Ten melanoma cell lines were treated with the indicated drugs and then gene modulation was evaluated by the Nanostring Cancer immune panel. The 731 genes were grouped into the indicated functional classes (sheets 1 to 21 of this file). Extent of modulation is shown as Log2(…
		7-IMMUNE LINEAGE / DIFFERENTIATION RELATED GENES
		GUADECITABINE											GIVINOSTAT											JQ1											GSK-126											ABEMACICLIB
	Gene symbol	VRG100	BRM17	FRN39	CST30	BNV13	MNT59	GRD43	GML41	CPN20	SLN91		VRG100	BRM17	FRN39	CST30	BNV13	MNT59	GRD43	GML41	CPN20	SLN91		VRG100	BRM17	FRN39	CST30	BNV13	MNT59	GRD43	GML41	CPN20	SLN91		VRG100	BRM17	FRN39	CST30	BNV13	MNT59	GRD43	GML41	CPN20	SLN91		VRG100	BRM17	CST30	MNT59
	FCER1G	2.67828	0.781669	3.66889	0.953946	0.692852	4.36107	2.80066	1.77487	2.21974	1.8511		-0.185316	0.63389	-1.01482	0.265236	0.849717	-1.38824	0.465382	0.840999	-4.66977	-1.78675		-1.83566	0.262989	-1.64609	-1.45513	-1.85843	-1.17042	-1.90275	-1.65275	-3.30951	0.100323		-0.0628622	0.30811	0.363911	-0.474301	0.187957	-2.52826	-1.55634	-1.8516	-1.74069	-0.00503779		-0.128436	-0.321821	-0.534843	-1.00966
	LY9	0.0882833	0.278059	2.58083	1.23334	-0.429857	5.30878	1.77558	1.56898	3.37926	0		0.0358695	0.337336	-0.425904	0.046957	-1.40658	-0.0676586	0.0884011	0.289835	-0.45707	1.20896		-1.72623	-1.60141	1.24197	0.0190482	-0.335669	2.3642	-1.43226	0.0504309	-0.485508	0		-0.123151	1.05885	0.993038	-0.0292704	0.779656	-0.047856	-1.49323	0.722873	-0.524729	0.398776		-0.884272	-0.759839	0.126294	1.07017
	SLAMF1	1.88387	0.506404	0.138337	-0.117991	1.6864	5.64465	0.126294	0.180884	2.08018	0.947789		-0.0727594	0.0764162	-1.52452	-0.46785	0.198851	1.24067	0.191891	0.289835	-0.45707	0		-0.131028	-1.83996	-1.64673	1.09918	1.72098	-0.629778	0.175891	0.0504309	-0.485508	0		0.0595921	-0.546588	-1.64673	-0.0682767	0	-0.741003	0.11493	-0.14842	-0.524729	0		0.138999	-2.17397	-0.257248	-0.0284379
	SLAMF7	0.00873368	-0.00913248	-0.00162938	1.68652	0.365206	2.63508	2.89818	2.10502	1.18632	1.42095		-0.0727594	0.0531098	-0.0468466	0.453441	0.0288101	0.760448	2.06491	1.36978	-0.156066	-2.41591		-0.131028	-0.0953102	-4.46584	-1.07956	-3.98279	-1.88445	0.175891	-0.753921	-1.32181	-2.41591		0.0595921	0.119801	0.0884411	-1.12788	0.315027	-0.17135	0.11493	-0.613609	0.0174848	0.42258		0.138999	-0.0953102	0.418204	-0.300516
	BST2	-0.183583	0.881169	1.99656	0.124491	0.0258795	0.513708	3.25137	0.246315	3.01334	0.132932		0.172025	0.673574	0.301076	0.32003	0.11943	0.877576	-0.860802	0.22362	1.8058	0.0352662		-1.15113	-1.25711	-2.69935	-0.949136	-0.962467	-1.35181	-3.31984	-1.97106	-2.92863	-0.965358		0.0146588	0.144879	0.00389288	-0.00947896	-0.0639879	0.202331	-0.358843	-0.031397	0.557042	-0.0695999		-0.231921	-1.00066	-0.0855915	0.276427
	CD48	1.26522	-0.43406	0.239269	0.169315	1.30333	2.57678	-0.161529	3.44036	0.189786	0.329218		-0.0727594	-0.699431	0.0305779	-0.0445547	-1.54146	-1.60246	0.788312	0.289835	-1.7839	0.304285		-0.131028	-0.687558	-2.39334	0.445585	-0.310512	-0.765147	-0.11099	2.96421	0.0656223	0.565973		0.0595921	-0.943191	0.245718	-0.33976	0.2903	-0.419575	-1.55634	-0.14842	-0.599846	-0.330242		0.138999	-0.516778	-0.217922	0.0892952
	CD22	-0.460675	2.27581	0.315572	0.417688	0.574508	0.613065	0.669182	1.08472	0.537798	0.317513		-0.362593	0.591777	0.0949781	1.13561	0.805334	0.581594	0.988048	0.177915	0.363887	-0.121011		-3.56353	-0.484207	-0.328831	-0.314094	-0.504756	-0.699242	-0.864746	-0.351887	-0.191135	-0.937787		0.172425	0.241949	0.0404648	0.140031	0.158447	0.205891	0.243773	-0.467312	0.51857	0.19108		-0.857225	-0.608856	-0.191864	-0.082822
	CD34	1.88387	-0.00913248	0.952161	-0.04325	0.517379	-0.0676586	0.463241	1.21153	2.50734	-1.09527		2.27682	0.0531098	-0.0175443	-2.94829	-1.49725	-0.0676586	-1.00904	1.72768	0.638422	-1.09527		0.701881	0.741937	-0.139762	-1.36488	0.593856	0.0633696	-1.43226	1.4816	-0.485508	-1.09527		0.0595921	2.37364	0.486176	-0.166005	0.484172	-0.047856	-1.08586	-1.06471	-0.524729	-1.09527		0.138999	0.233994	-0.786343	0.664709
	CD5	1.46548	-0.00913248	1.64241	-0.0194181	1.18059	0.936643	0.612168	1.0199	-0.524729	-0.146668		2.21497	0.0531098	-0.425904	0.046957	-0.489284	-0.0676586	-0.382084	1.28432	1.73703	-1.48478		-0.16143	-0.0953102	-0.548121	1.81238	-0.668332	0.0633696	-0.293311	0.778996	0.616304	-1.10472		0.755948	2.56495	1.17465	1.21924	0.685581	-0.047856	-1.96371	-0.191125	-0.524729	-2.10535		-1.7066	2.43202	0.823669	-0.0284379
	SH2D1A	0.00873368	-2.02646	2.68696	0.772033	0.0819297	3.05559	2.16363	0.180884	0.758979	-1.90509		-0.0727594	-0.57792	-0.0175443	1.06508	-0.603535	0.324383	0.753331	0.289835	-0.45707	-0.330242		-0.131028	-0.487323	-0.139762	-1.36547	-0.343528	0.0633696	-1.6148	0.0504309	0.207639	-1.90509		0.0595921	-1.89752	-0.139762	0.0137357	0.320076	-0.047856	0.92841	-0.14842	-0.524729	-0.816526		0.138999	0.0632529	-0.770638	-0.0284379
	CD19	0.663793	0.890697	1.04815	0.0489315	-0.169238	0.368	1.01385	0.509375	0.190526	0.283448		0.489226	0.421674	0.328555	0.19122	-0.285452	-0.0923926	-0.248438	0.673758	-0.259315	-0.179934		-0.295596	-0.221501	0.474724	-0.260125	0.101279	-0.0755309	-1.7691	0.141651	-0.083727	-0.339858		0.271505	0.421151	0.258474	-0.238328	0.145665	0.29496	-1.83006	-0.278226	-0.537963	-0.623495		-0.221069	-0.340186	-0.22363	0.438761
	CD36	-0.471568	-1.17379	0.623563	0.316109	0.239497	0.63103	0.612168	0.974777	0.382345	2.10593		0.499502	-0.349092	0.307061	1.32968	1.12838	1.01102	-1.88675	1.35819	1.45974	0.810184		-2.17788	-0.930062	-1.70348	-1.96061	-3.54039	-0.498226	-0.804137	-2.5164	-1.23991	1.36252		0.104394	0.667217	-0.0322011	-0.173974	-0.168082	0.407576	-1.96371	-0.140345	-0.0561123	1.38293		0.420363	1.15361	-0.752252	1.70823
	SLAMF6	0.865616	-0.00913248	1.80042	-0.0194181	0.770108	-0.161969	1.22491	0.180884	-2.54003	2.04511		-0.472359	0.0531098	0.675603	0.046957	0.198851	-0.760806	1.44541	0.289835	-1.7839	1.71919		-0.530628	-0.0953102	1.24653	0.712195	0.0198026	-0.629778	0.175891	0.963438	-2.50081	0.14842		-0.340008	0.119801	0.889857	-0.0292704	1.08519	1.05402	0.11493	-0.14842	-2.54003	0.802002		-0.260601	1.08334	0.126294	1.47564
	PRG2	2.68677	0.684033	-0.337108	0.55953	-0.391815	0.855905	0.489509	0.048431	-0.586956	-0.119235		2.27682	-0.0666914	-0.221392	1.13599	0.567896	0.360891	0.577892	1.04891	-0.873354	0.0290459		-0.131028	0.334454	-1.15549	0.615332	-0.0267041	0.228142	-2.5959	-0.244285	-1.67412	-2.26355		0.0595921	1.14201	-0.0473303	-0.0639374	-0.395186	0.122537	-2.65686	0.238256	-0.504986	0.120529		0.541916	1.97403	1.6202	0.157602
	FCGR3A	0.352441	1.93809	2.25175	1.23446	0.0819736	-0.760806	-2.5809	0.876464	0.981569	-0.806476		-0.834084	0.0531098	-0.0175443	3.0774	-0.197512	-0.760806	-0.263177	0.864228	-0.45707	-0.806476		-0.799552	1.3302	-0.139762	-0.204095	-0.516986	0.0633696	0.107753	0.917087	-0.485508	-0.806476		-1.9518	1.82748	0.889857	0.799757	-1.78675	-0.741003	-2.59227	-1.1476	-0.524729	-0.806476		-0.36916	1.08334	0.822825	0.664709
	SH2B2	0.849291	1.37613	0.275548	0.0750713	-0.0685563	-0.262364	-0.128857	0.105074	1.15067	-0.109284		0.547572	1.01071	0.243264	0.324026	0.228302	0.359517	0.500471	0.329743	1.24011	0.102039		-0.625645	0.477645	-0.53203	-0.180075	-0.263616	-0.313558	-0.0255333	-0.133398	-0.0912012	-0.894613		-0.0197468	0.773512	0.154472	0.0954919	-0.0438802	-0.125991	-0.11113	0.199179	0.827582	-0.0960257		-0.0314964	0.695933	0.0902545	-0.0603145
	FCGR2A	0.107203	-0.146378	0.869553	0.410615	0.487555	0.904497	0.254323	0.63697	-0.365703	0.0441451		0.103431	-0.866606	0.213296	-0.00888981	-0.0683075	-0.0372176	0.216061	0.680944	-0.970027	-0.596428		0.0272857	-1.04846	-2.48727	-1.58897	-1.83456	-0.389869	-0.516382	0.174757	-1.99468	-0.890532		-0.0912113	0.223341	0.175125	-0.0273055	-0.0172832	0.602499	0.22495	0.180768	-1.50913	-0.310027		-2.20903	-0.569556	0.0357181	-0.123748
	LILRB2	0.0174524	0.0364602	0.320658	1.2102	1.46326	0.018519	-0.68463	0.180884	0.909972	-0.398791		-0.985535	0.531339	-2.03534	0.697943	0.198851	0.449944	0.106393	0.289835	0.517105	-0.330242		1.08799	-1.27371	-2.15756	-0.674099	0.0198026	0.398588	-2.71377	0.450416	-0.892943	-1.90509		-0.160037	0.21098	-0.148004	0.314951	2.47148	0.292809	-2.77473	-0.14842	-0.932164	-1.10309		-0.773777	-0.5091	0.129115	-1.63788
	CD79A	1.76802	-0.00913248	0.996918	2.1218	-1.86465	-0.76884	0.34427	0.540475	-0.524729	0.162641		-1.94186	0.0531098	-0.292653	0.046957	-1.74276	-1.90697	1.82711	0.10615	-0.45707	0.27234		0.441349	0.741937	0.278758	2.09967	-1.92181	-1.27404	-3.43416	0.342865	-0.485508	0.315015		-1.11636	1.99408	0.838642	-0.0292704	0.753687	0.720311	-0.425608	-2.13785	-0.524729	-1.01679		0.409516	2.27213	1.22773	-1.10552
	LILRB3	0.00873368	0.816098	1.80042	-0.0194181	0.076961	-0.0676586	0.126294	0.180884	-0.524729	0.254642		0.332706	-1.20225	-0.0175443	0.046957	0.198851	-0.0676586	0.191891	0.289835	-0.45707	0		-0.131028	-1.35067	-0.139762	0.0190482	0.0198026	0.0633696	0.175891	0.0504309	-0.485508	0		0.0595921	0.738725	-0.139762	-0.0292704	0	-0.047856	0.11493	-0.14842	-0.524729	0		0.138999	0.44608	0.126294	-0.0284379
	CD79B	0.616807	-0.540064	-0.139762	2.1881	-1.30432	1.08922	-1.48218	0.397207	1.16352	0.65752		0.706515	-2.08909	1.08107	0.781293	-1.18243	-0.760806	-0.0611862	0.746392	0.231393	0		-1.14958	-0.175726	0.553385	0.174546	0.886712	1.67105	0.0143337	1.23785	-0.485508	0.14842		-0.978761	-0.516534	-0.139762	0.190567	0.397055	1.45948	-1.17353	0.0606246	-0.524729	0		0.0164275	-2.23751	-0.0526437	-0.0284379
	LILRA5	0.00873368	-0.00913248	1.46366	-0.0194181	0.076961	-0.0676586	1.51259	0.180884	-0.524729	0		-0.0727594	0.0531098	-0.0175443	0.046957	0.198851	-0.0676586	0.191891	0.289835	-0.45707	0		-0.131028	0.741937	-0.139762	0.0190482	0.0198026	0.0633696	0.175891	0.0504309	-0.485508	0		0.0595921	2.79673	-0.139762	-0.0292704	0	-0.047856	0.11493	-0.14842	-0.524729	0		0.138999	1.70144	0.126294	-0.0284379
	LILRA4	2.26414	-0.00913248	-0.139762	-0.0194181	0.076961	-0.0676586	0.126294	-0.6805	0.981569	0		-0.0727594	0.0531098	-0.0175443	0.046957	0.198851	-0.0676586	0.191891	-1.55203	-0.45707	0		-0.131028	-0.0953102	-0.139762	1.63037	1.72098	0.0633696	0.175891	0.538087	-0.485508	0		0.0595921	0.119801	-0.139762	-0.0292704	0	-0.047856	0.11493	-2.3979	-0.524729	0		0.138999	-0.0953102	0.823669	-0.0284379
	FCGR2B	0.00873368	-0.00913248	0.944326	0.451194	0.111913	-0.45768	0.616048	0.249473	0.352241	0.189131		-0.0727594	0.0531098	0.31826	0.483196	0.216116	-1.17117	0.328821	-0.0740268	0.649501	0.0259205		-0.131028	-0.0953102	0.0625388	-2.83229	-0.66071	0.19702	-1.51494	-0.862109	0.0912003	-1.85823		0.0595921	0.119801	-0.265505	-0.0108818	-0.0754807	-0.120058	0.319175	-0.143807	-1.6579	-0.227709		0.138999	1.08334	-0.144928	-0.0844974
	PTPRC	0.00873368	1.09253	1.23878	-0.0920719	-0.12903	1.0409	-2.07022	1.56898	-1.84437	1.639		1.79759	0.0531098	-0.935573	0.719327	0.254234	1.73789	0.247506	2.54418	-1.96492	0.620576		-0.131028	0.741937	-1.05779	0.102828	0.216037	1.16003	-0.0747113	0.0504309	-3.08885	0		0.0595921	0.119801	1.07044	0.293916	0.314357	-0.0445934	-0.208462	-0.14842	-3.12808	0		0.138999	-0.0953102	0.101091	1.07017
	MS4A1	0.00873368	1.37945	0.952161	-0.0194181	0.076961	-0.0676586	0.126294	0.180884	-0.524729	0		-0.0727594	1.15172	-0.0175443	0.046957	0.198851	-0.0676586	0.191891	0.289835	-0.45707	0		-0.131028	-0.0953102	-0.139762	0.0190482	0.0198026	0.0633696	0.175891	0.0504309	-0.485508	0		0.0595921	0.119801	-0.139762	-0.0292704	0.678034	-0.047856	0.11493	-0.14842	-0.524729	0		0.138999	-0.0953102	0.126294	-0.0284379
	MME	0.930228	-0.336829	-0.790591	-0.0194181	0.0139809	1.43939	0.0634388	0.223151	0.421358	-0.368619		0.332706	0.269382	-1.06803	0.046957	0.477706	0.313478	0.822687	0.598006	0.0227609	-1.31641		-0.131028	0.632485	-2.7988	0.712195	-0.239444	-1.10183	-1.02008	-0.865507	-0.906891	-1.31641		0.0595921	-0.27743	-0.99627	-0.0292704	0.00699203	-0.419283	-0.601309	-0.0159086	0.635267	0.689118		0.138999	0.181876	0.126294	-1.19188
	PLA2G6	-0.0330661	0.155694	0.365645	-0.0256313	0.109413	-0.0725047	0.35032	0.066791	-0.135915	0.427709		-0.0480139	-0.324298	0.121067	-0.0914885	-0.153907	-0.186676	0.581458	-0.0927028	-0.648774	0.222314		-0.405073	-0.557978	-0.415414	-0.0773892	-0.739588	-0.29534	-0.645468	-0.268741	-1.27942	-0.0448618		-0.0419698	-0.0310326	0.116069	0.101858	-0.036476	0.115748	0.14156	-0.113909	-0.259024	0.20258		-0.0442628	-0.513275	0.0210394	0.153256
	LTF	-2.00265	1.56352	-0.302835	-1.00025	-0.38803	1.00624	1.30612	0.60087	-0.398539	0.54599		-2.08415	0.143219	-2.88198	0.53317	-1.87558	-0.636643	-1.1928	-1.127	-0.411428	-2.23327		-2.14242	-1.06332	-3.0042	-1.36725	-0.55273	-0.836514	-1.2088	-0.921665	0.590673	-2.3466		0.533111	1.03221	-1.97458	-1.01341	0.215071	-0.249438	-1.26976	-0.993014	-0.178029	-0.246133		-1.87239	0.0383723	-1.26	-0.685564
	CD83	0.258268	-0.0172077	-0.327811	0.0820135	-0.111351	0.124361	0.00493437	0.267042	-0.461259	0.0541761		0.485455	0.419629	0.0909416	-0.006589	0.166799	0.496733	0.242604	0.0898542	-0.053474	0.120572		-0.925129	0.721849	-1.34981	0.117273	0.532367	-0.200227	-0.969754	-0.951784	-1.17788	-0.694134		0.794618	-0.0879355	-0.0617965	0.0495923	0.0415195	0.0576304	0.261743	0.0939055	-0.252136	0.14615		0.0599343	0.163377	0.0260757	0.191401
	IGLL1	0.95506	1.05113	-0.139762	1.16074	-1.99747	-0.0676586	-0.279171	-0.731862	-0.524729	0.44145		0.951288	-0.354373	-0.0175443	-0.64619	-1.87558	0.324383	-0.906721	-1.72392	-0.45707	0.738997		-0.288335	-1.60141	0.95885	0.424513	0.616814	1.15905	-0.922722	1.10091	-0.485508	-0.315776		0.638862	-1.38629	-0.139762	-0.722418	-0.477064	-0.047856	-0.983682	-2.16217	-0.524729	-1.31641		-1.36117	-1.60141	0.53458	-0.0284379
	BST1	0.284808	-0.607812	-0.209799	0.00400051	-0.00834489	-0.106317	-0.155151	-0.133988	0.549758	0.05177		-0.212265	-0.523089	0.134	-0.367524	-0.24365	-0.203968	-1.04215	-0.416871	0.0439346	0.281875		-1.56942	-0.62616	-0.300804	-1.07023	-0.626396	-0.819557	-2.11509	-1.42942	-0.616399	-0.62089		0.126509	-0.123913	0.29173	-0.0954304	0.0144595	-0.0577515	-0.283645	0.122887	0.306671	0.107538		-0.297445	-0.645996	-0.726854	-0.541511
	LILRB1	0.00873368	-0.00913248	-0.139762	-0.0194181	0.076961	-0.0676586	0.126294	0.180884	-0.524729	0		-0.0727594	0.0531098	-0.0175443	0.046957	0.198851	-0.0676586	0.191891	0.289835	-0.45707	0		-0.131028	-0.0953102	-0.139762	0.0190482	0.425268	0.0633696	0.175891	0.0504309	-0.485508	0		0.0595921	0.119801	-0.139762	-0.0292704	0	-0.047856	0.11493	-0.14842	-0.524729	0		0.138999	-0.0953102	0.126294	-0.0284379
	RAG1	0.952497	0.349826	0.615289	0.296178	-0.798208	0.588394	0.195638	-2.78776	0.146834	-0.0104149		1.36204	0.626045	0.00337981	0.80424	0.797858	0.58052	0.700908	1.1195	0.851008	0.410573		-0.91053	-0.651338	-1.77622	-1.23247	-0.578664	-1.08774	-0.322184	-0.479437	-0.948574	-1.67553		0.0476891	0.428939	-0.287259	-0.172838	0.0155607	0.336212	-1.51005	-2.24577	-0.230436	-0.450684		0.96698	-0.974424	-0.429691	-0.0786576
	FCGR1A	0.00873368	-2.02646	0.065571	0.244592	0.369656	-0.937711	1.22491	0.180884	-0.661232	0.949835		-0.0727594	-0.354777	-0.292653	0.014013	-0.486555	-0.20499	0.191891	0.289835	-1.59279	1.13474		-0.131028	-0.687119	0.278758	-0.607741	1.38713	0.386122	2.47848	0.963438	-0.516949	1.09414		0.0595921	0.245385	0.00247627	-0.0662933	1.1959	-2.61352	0.11493	-0.14842	-0.632096	1.09302		1.05376	0.254802	0.0609641	-0.109199
	BLNK	0.00873368	-1.26449	-0.139762	-0.0194181	0.076961	-0.0676586	0.126294	0.180884	0.47222	0		-0.0727594	-1.20225	-0.0175443	0.046957	0.198851	-0.0676586	0.191891	0.289835	-0.45707	0		0.701881	-1.35067	-0.139762	0.0190482	0.0198026	0.0633696	0.175891	0.0504309	-0.485508	0		0.0595921	0.119509	-0.139762	-0.0292704	1.77834	-0.047856	0.11493	-0.14842	-0.524729	0		0.138999	-1.35067	0.126294	0.664709
	ADA	0.455617	-0.433198	-0.1061	0.203088	0.0414676	-0.155773	-0.0303255	-0.199632	-0.232744	-0.182869		-0.099519	0.272659	0.122658	0.189596	0.43097	0.198854	0.317349	0.137126	0.0974804	0.159107		-1.69324	-1.56398	-1.18381	-0.987378	-0.308339	-0.860095	-1.31136	-0.992065	-1.07719	-1.33412		-0.0878046	0.578671	-0.0268093	-0.070434	-0.00999732	-0.0171696	-0.0553826	-0.043716	-0.124229	0.0424363		-0.760362	-0.59818	-0.200748	-0.0499651
	LILRA1	1.26522	0.684015	0.343657	-1.96533	-0.100348	0.243496	-1.05137	0.796514	-0.946307	-0.00413224		0.332706	0.0531098	-1.72466	-0.393857	1.12397	-0.760806	-2.37207	1.0964	-0.373716	-1.06317		1.79904	0.233994	-0.460584	0.153758	0.245341	0.754321	-2.38807	1.37461	-0.802098	-2.27213		1.44589	0.525266	0.481374	0.272457	0.280116	0.650181	-2.44903	-2.0189	-0.982982	-2.27213		0.138999	-0.0953102	-0.429094	0.887853
	CD37	0.00873368	-0.414598	-0.139762	-0.0194181	0.076961	-0.0676586	0.126294	0.180884	-0.524729	0		-0.0727594	0.340792	-0.0175443	0.046957	0.198851	-0.0676586	0.191891	0.289835	-0.45707	0		-0.131028	-0.171472	-0.139762	0.712195	0.0198026	0.0633696	0.175891	0.0504309	-0.485508	0		0.0595921	-0.285664	0.486176	-0.0292704	1.59737	-0.047856	0.11493	-0.14842	-0.524729	0		0.138999	0.340792	0.126294	-0.0284379
	CD24	1.15301	0.59242	0.17946	1.48466	-0.611174	1.65288	0.0467668	-2.55829	-1.38143	-1.46812		2.34772	0.743138	0.434369	0.965081	4.13962	0.922593	-0.231072	-0.94311	0.0382299	-0.696725		1.57639	1.59354	-1.40754	0.0190482	2.89844	1.02225	-0.596313	0.110639	0.371732	0.351034		0.119851	0.991907	0.315759	-0.0292704	1.78335	0.0290286	-2.44903	-2.88759	-1.19497	-2.41591		1.75091	0.125812	0.126294	0.625154
	AICDA	0.00873368	-0.415186	-1.05779	-0.0194181	2.02287	-0.0676586	0.126294	0.180884	-2.39699	0		-0.0727594	0.114149	-0.935573	0.046957	0.896088	-0.0676586	2.44402	0.289835	-2.32933	0.113329		-0.131028	-2.11263	-1.05779	0.0190482	0.425268	0.0633696	1.2745	0.0504309	-2.35777	0		0.0595921	-0.0232426	-1.05779	-0.0292704	2.55179	-0.047856	0.11493	-0.14842	-2.39699	0		0.138999	-0.315887	0.126294	-0.0284379
	CD2	0.00873368	-2.15134	-0.139762	-0.0194181	0.076961	-0.0676586	0.126294	0.180884	-0.524729	0		0.843531	-0.298771	-0.0175443	0.046957	0.198851	-0.0676586	0.191891	0.289835	-0.45707	0		-0.131028	-1.40027	-0.139762	0.0190482	0.0198026	0.0633696	0.175891	0.0504309	-0.485508	0		0.0595921	0.422746	-0.139762	-0.0292704	0	-0.047856	0.11493	-0.14842	-0.524729	0		0.138999	0.038728	0.126294	-0.0284379
	FCER1A	-0.255114	-2.02646	2.5616	0.735506	-1.01831	-2.1471	-0.383249	0.180884	-0.541765	0.322588		0.383453	-1.96421	1.77274	-1.33934	0.204918	-2.1471	0.835863	0.289835	0.136484	0.638037		-1.47643	-0.687119	1.93843	-1.36725	1.17272	0.179201	-1.43226	0.963438	0.295714	-1.31641		-0.102614	-0.978012	2.42979	-1.41556	-1.09527	-2.1273	-1.49323	-0.14842	0.116588	0.465301		0.238239	-0.315887	-1.26	0.194706
	CD33	0.00873368	-0.00913248	-1.05779	-0.712565	1.6864	-0.414855	0.126294	0.180884	-2.54003	0		-0.0727594	0.0531098	-0.935573	2.15745	3.72906	1.20273	1.10924	0.289835	-0.866675	0		0.294239	-0.0953102	-0.364643	-0.674099	0.932164	0.166974	0.175891	0.0504309	-2.50081	0		0.0595921	0.119801	-1.05779	1.41356	2.2895	-1.14321	0.11493	-0.14842	-2.54003	0		2.38989	-0.0953102	-0.566853	0.819318
	FCER2	0.450821	1.60214	1.52505	-2.72683	0.076961	-1.45395	-1.2584	-2.06859	-0.524729	0.808246		-1.77431	0.0531098	-0.425904	-2.66045	1.30019	-1.45395	-1.1928	0.905322	-0.45707	0.258438		-1.83258	-0.0953102	-0.548121	-2.68836	2.26799	-1.32292	-0.515653	0.817374	-0.485508	-0.65372		-1.64196	0.119801	0.077817	-2.73668	2.38509	-1.43415	-1.26976	-2.3979	-0.524729	-1.31641		-1.56255	1.08334	-2.58112	0.531178
	MS4A2	0.0174524	-1.71718	-1.84688	-0.0194181	-0.729515	-0.855117	-1.6644	1.56898	-0.445253	-1.10274		-0.985535	-1.65494	0.353674	0.046957	-1.99392	-1.45395	-0.681451	2.64397	-1.37454	-0.863581		0.482252	-0.377844	-1.15373	0.0190482	-0.671071	-1.32292	-1.6148	2.48921	0.796378	-2.27213		-0.853184	0.76543	0.281353	1.98233	0.359016	0.360872	-1.67576	2.15915	-0.888317	-0.00413224		-0.773777	-1.47405	0.126294	-1.41473
		Log2(Treated/Ctrl)
		-4															4
		-4	-3.5	-3	-2.5	-2	-1.5	-1	-0.5	0	0.5	1	1.5	2	2.5	3	3.5	4
[truncated: 3 more columns]

## Sheet: 8-Inflammation-related genes
		Supplementary Table S4. Sheet #8. Modulation of immune-related genes belonging to 21 functional classes by epigenetic drugs. Ten melanoma cell lines were treated with the indicated drugs and then gene modulation was evaluated by the Nanostring Cancer immune panel. The 731 genes were grouped into the indicated functional classes (sheets 1 to 21 of this file). Extent of modulation is shown as Log2(…
		8-INFLAMMATION-RELATED GENES
		GUADECITABINE											GIVINOSTAT											JQ1											GSK-126											ABEMACICLIB
	Gene symbol	VRG100	BRM17	FRN39	CST30	BNV13	MNT59	GRD43	GML41	CPN20	SLN91		VRG100	BRM17	FRN39	CST30	BNV13	MNT59	GRD43	GML41	CPN20	SLN91		VRG100	BRM17	FRN39	CST30	BNV13	MNT59	GRD43	GML41	CPN20	SLN91		VRG100	BRM17	FRN39	CST30	BNV13	MNT59	GRD43	GML41	CPN20	SLN91		VRG100	BRM17	CST30	MNT59
	SAA1	0.321328	3.27577	2.89855	4.89608	1.95449	1.70814	3.54142	1.69802	4.48996	2.60491		-0.0673025	0.00938974	-0.0175443	3.17182	1.30657	-1.45395	-1.41626	1.50704	-0.279051	1.71919		-2.79213	1.44922	-0.139762	0.712195	1.85425	-1.32292	-0.04597	0.946291	0.390379	0		0.0252831	0.120199	-0.139762	1.62565	1.69695	-0.332275	-1.49323	-1.48696	-1.4422	0		-0.0578215	-1.78165	1.04597	-1.41473
	F2RL1	0.534692	1.92456	3.77628	-0.094292	-0.0176428	1.85147	0.126294	-0.224581	2.90843	2.73826		0.411921	1.01071	0.672709	0.934238	0.982656	1.66753	1.94178	-0.11563	1.38951	0		-0.405731	1.26563	2.09022	-0.0718468	0.23978	-0.629778	-0.517257	-0.355034	-0.579435	0		0.263277	0.690354	0.481498	-0.208815	0.0410534	-0.741003	-0.578217	-0.553885	0.270602	0.802002		0.421267	0.97506	-1.44997	-0.721585
	S100A7	0.00873368	1.09253	1.42043	1.90954	0.998264	1.62796	0.327163	0.180884	1.60496	2.60491		4.40854	0.0531098	-0.935573	0.366244	1.71158	1.17072	-0.184462	2.64397	0.868105	1.40854		0.294239	0.741937	-1.05779	-1.36725	1.68024	0.756517	-0.922009	3.20359	1.05611	0		0.0595921	0.525266	-1.05779	-1.41556	1.86365	0.650181	-1.67421	-0.14842	-0.376966	1.90061		0.541916	-0.0953102	-1.26	-0.0284379
	NOS2A	0.0162984	1.25628	3.73593	0.98844	0.0154394	1.50371	1.41942	0.366023	1.11847	1.23863		-0.381116	0.601458	0.79683	0.987387	0.79901	0.121254	-0.741021	0.738709	-0.505697	0.646308		0.0756996	-0.139317	0.406621	0.445585	0.898566	-0.632001	-0.670491	-0.337716	-0.729267	0.117783		-1.25865	-0.806065	1.41085	0.675448	0.0233873	0.0505457	0.396257	0.667971	-0.621245	0.768371		-1.87239	-1.09861	0.664151	-0.827413
	PTGS2	1.35136	2.04594	0.831484	0.70884	0.23222	0.920839	0.487056	0.957676	0.76477	1.35325		1.15231	0.382858	0.553819	0.544931	0.820169	0.178137	1.48334	1.02626	0.0289995	0		-1.0438	0.456843	-0.953587	-1.60435	1.11613	-1.23193	-0.482522	-0.0632996	0.0273335	0		0.938576	0.912488	0.848948	-0.13595	0.0192573	-0.432297	-0.490333	-0.077251	-0.00305574	0		1.47711	-0.323316	-1.98016	-1.32157
	CAMP	-0.115701	3.63014	2.79834	2.584	-2.62641	-0.0676586	1.37959	0.180884	-0.524729	2.07756		-0.532351	1.99779	-0.0175443	2.96498	-1.11414	-0.0676586	-0.0941344	0.289835	-0.45707	-1.78675		-2.71239	-0.0953102	-0.139762	0.0190482	-2.68357	0.0633696	-1.6148	0.0504309	-0.485508	-1.78675		-0.0373427	2.9256	-0.139762	-0.0292704	0.227821	-0.047856	-1.67576	-0.14842	-0.524729	-1.78675		-1.63521	-0.0953102	0.823669	-0.0284379
	SPINK5	1.71743	-0.00913248	2.33846	-2.32104	-1.01831	2.66995	1.7346	2.26212	0.017183	1.75786		0.843531	0.0531098	1.08107	-2.25467	0.899427	0.324383	0.191891	1.20999	-0.756458	0		-0.131028	2.42882	0.553385	-0.896281	0.79331	0.0633696	2.1218	2.84981	-3.55397	0		0.0595921	1.03931	1.4014	-0.194913	1.08853	-0.047856	0.11493	-0.14842	-0.553924	0		1.64223	-0.0953102	-2.17533	-0.0284379
	IRGM	0.930228	-0.254587	3.22131	-0.0194181	0.076961	4.41122	0.126294	0.180884	-0.524729	0		3.12437	-2.39161	-0.0175443	0.046957	0.198851	-0.438722	0.191891	0.289835	-0.45707	0		-0.131028	-2.54003	-0.139762	0.0190482	1.5217	-1.54607	0.175891	0.0504309	-0.485508	0		0.0595921	0.0287622	-0.139762	-0.0292704	0.678034	-1.65729	0.11493	-0.14842	-0.524729	0		0.138999	-2.54003	0.126294	-1.63788
	ANXA1	0.676876	-0.0721845	0.550091	0.344558	-0.0553306	1.60634	1.31801	-0.161096	1.55681	0.0526678		0.577109	0.1367	0.275494	0.198247	0.390182	0.832378	0.296397	0.528671	0.834914	0.148136		-1.28877	-0.105553	-0.494695	-0.940178	-0.222018	0.138363	-0.974341	-1.1905	-0.597346	-1.26487		-0.0768361	0.115099	0.0107577	-0.103746	-0.135385	-0.264863	-0.452387	-0.0521943	-0.0385942	-0.0851619		0.0811528	-0.310289	-0.230917	0.140314
	TXNIP	-0.308234	0.165647	1.27678	0.135703	0.911452	1.42539	0.412456	0.0837666	0.656379	0.461136		0.606548	0.198	0.224994	0.296843	1.47844	0.567506	0.131508	0.921439	1.04976	0.430412		0.939561	1.0047	0.746677	1.01958	2.49353	0.319055	1.72429	1.47829	1.62712	1.46958		0.00526617	0.0925947	0.0787285	-0.210875	-0.284907	-0.108903	0.0435157	-0.274064	0.106376	0.147707		-0.0781371	0.031652	-0.217749	0.292858
	NOD2	-0.395865	-0.00913248	1.46366	0.764534	1.06113	0.531178	1.37825	0.180884	-0.524729	0		1.45767	2.24938	-0.0175443	0.681025	3.16797	0.83656	1.00341	0.289835	-0.45707	0		-3.85376	-0.0953102	-0.139762	-3.47697	0.936814	1.44747	-0.517257	0.0504309	-0.485508	0		0.165863	2.13685	2.09347	0.0217233	1.6641	-0.047856	-0.578217	-0.14842	-0.524729	0		0.752911	-0.0953102	-1.63214	1.35786
	ADORA2A	-0.174824	0.460525	0.802276	0.175891	1.33474	0.569902	1.13808	-1.06941	0.447674	0.576933		-0.0467468	-0.173076	-0.21552	0.704076	1.81739	0.173855	0.590634	-0.960462	0.296711	-1.07135		-1.11158	0.366496	-0.896088	0.964557	1.34395	0.408832	-1.43275	-1.19987	-0.553522	-0.130425		-0.323186	0.0370413	-0.965974	0.0364167	1.60137	-0.227042	-1.22041	-1.39872	-0.482063	-0.698185		-0.761248	0.0426201	-0.0250361	-0.316899
	RELB	1.32809	0.622267	0.877035	0.429365	0.199128	0.287731	-0.110881	0.172927	0.235921	0.0900273		0.239601	0.0680332	-0.282348	0.233612	0.0116651	-0.459364	0.0164823	0.0280633	-0.528821	-0.201038		0.206828	0.543997	0.370572	-0.159346	0.712332	-0.272002	-1.06199	-0.314001	-0.284408	-0.120234		-0.103564	0.104979	0.0620562	0.0800653	-0.164153	-0.117983	-0.584577	-0.150407	-0.438885	0.0866115		0.483985	-0.101924	-0.224876	0.449257
	DDX58	0.133954	0.231645	0.795413	0.141084	0.203887	0.84033	0.302377	-0.175773	1.11358	0.499311		0.0960563	0.462732	0.216611	0.171549	-0.25165	0.282429	-2.65824	-0.29226	0.231949	0.102011		0.0516636	0.159137	0.666475	0.104756	-0.57821	-0.0997513	-1.47203	-0.975458	1.10465	0.174132		-0.163866	0.151548	0.284799	-0.13539	0.0426253	0.333546	-1.26931	-0.157012	0.283732	0.0516752		-0.185653	-0.14766	-0.0308935	0.394846
	NLRP3	0.659089	0.451303	0.321548	-0.0488883	0.0177171	1.06398	0.0211069	0.76047	-0.328738	0.609863		0.501704	0.420158	0.0137849	-0.0484761	0.262607	0.120643	0.801998	0.593422	-0.557695	-0.0382212		-2.03613	0.899007	-0.756992	-0.926752	0.519125	-0.821537	-0.254091	-0.438405	-0.166355	-0.226497		0.317731	0.120074	-0.0292037	-0.0632173	0.0332828	-1.01402	-1.32035	0.0810782	-0.364031	-0.227618		-0.45939	-0.975217	-0.206447	-0.217602
	APOE	-0.359931	1.42179	0.906434	0.127132	0.00225833	-0.18833	0.0153671	0.174782	0.0447573	0.961797		1.29906	1.37108	0.252728	0.454934	0.407171	0.181095	0.231425	1.12697	1.05482	1.14816		-1.77454	-1.50405	-1.35576	-0.170678	0.233867	-0.271649	-0.393982	-0.662738	-0.526179	-2.91617		0.0958645	0.330555	0.071293	-0.0363064	-0.0592243	0.114199	0.122381	0.0724328	0.4679	0.645544		0.387226	-1.16655	0.0067604	0.496106
	PYCARD	0.464771	0.380263	1.59544	0.0931956	-0.261876	0.781271	-0.32621	-0.444333	-1.2461	1.46375		0.740961	1.08314	-1.27155	-0.465786	-0.56856	-2.01357	-0.553762	-0.364084	-1.16829	-0.398776		-3.63969	-0.270995	-0.00747201	-1.27695	-0.409013	0.194706	-1.02171	-0.992169	-3.00839	-0.250356		0.502493	0.386942	-0.767828	0.0689578	-0.0663865	-1.99377	0.0315085	-0.0342789	-0.203965	-0.398776		-3.36966	-0.416719	-0.0555578	0.733702
	IKBKE	0.515815	0.209037	0.394754	0.0728256	0.142315	0.573851	0.133104	0.14884	-0.05183	0.299667		0.0236824	0.122307	0.125525	0.107141	0.273965	0.153785	-0.230111	0.365756	-0.346814	-0.221288		-1.88787	-0.865491	-2.07594	-1.83655	-0.534884	-0.641842	-1.7561	-1.16391	-2.07964	-4.40806		-0.00987621	0.117113	0.0584201	-0.0301642	0.0907897	0.0277295	-0.174719	-0.126194	-0.321407	0.200206		-0.125236	-0.229353	-0.000487231	0.155428
	AMBP	-0.0733882	-0.00913248	1.46366	1.68711	-0.370468	1.9161	-1.6644	-0.178724	0.0630581	-0.806476		1.09561	0.0531098	-0.0175443	1.75254	-2.19449	1.423	-2.29195	0.293857	-0.45707	-0.806476		-1.15324	-0.0953102	-0.139762	0.0190482	-0.0249666	1.67105	-2.30795	0.844398	-0.485508	-0.806476		-0.45477	0.119801	0.889857	1.67277	0.426848	1.90225	-0.116113	-0.0304902	-0.524729	-0.00447428		-2.10025	-0.0953102	1.22773	1.35786
	NFKB2	0.501055	0.277686	0.4086	0.168322	-0.0903322	0.243908	-0.0461869	0.106709	0.129443	-0.139591		0.138242	0.0116957	0.224677	0.182493	0.211315	0.0174595	-0.00943065	0.117088	-0.231821	-0.204117		-0.293276	0.590684	0.149792	-0.421249	0.9272	-0.109252	-0.53333	-0.393818	-0.373025	-0.720873		-0.12873	-0.0817394	0.164938	-0.0531089	-0.0381496	0.0514279	-0.417605	-0.102082	-0.445292	0.104195		0.239271	-0.244753	0.0136239	0.467362
	NFKBIA	0.42261	0.336065	-0.232805	0.316031	-0.112058	-0.16184	0.0586537	0.0887053	0.383741	0.237338		0.258124	0.0393423	-0.161976	-0.0954557	0.0865415	-0.60476	-0.105692	-0.113597	-0.160232	-0.000222596		0.126154	0.908276	-0.27004	0.0386962	1.15005	0.2927	-0.506823	-0.125244	0.432611	-0.0183762		0.0641362	0.122366	-0.176447	0.068873	0.0555255	0.0119857	-0.0798458	0.0300252	0.0336699	0.185739		0.429336	0.768562	0.0937367	0.469626
	IKBKG	0.331101	-0.00219969	0.197683	-0.0200053	0.0557358	-0.0661475	0.203993	0.0877732	0.409254	0.0372278		-0.113324	-0.0987903	0.136183	-0.0562141	-0.181486	-0.210466	0.0129253	-0.102207	0.275722	-0.150821		-0.0392976	0.113512	0.230143	-0.0400823	-0.0116081	-0.0867458	-0.039513	0.0115651	0.33475	0.0809662		-0.0514682	-0.0113567	-0.010033	-0.051394	0.020346	-0.0304175	0.0408548	-0.0710923	0.250514	-0.0677893		0.0875934	0.0302133	0.164438	-0.0396494
	A2M	0.384154	0.758597	0.166363	-0.0876306	-0.295468	-0.0981044	-0.0350521	0.844649	-0.1955	-0.239626		-0.722098	-0.0604629	0.244892	0.141036	0.783809	0.5381	0.732564	1.89293	0.0664489	0.165636		-2.74805	-2.68405	-0.308063	-1.21535	0.147208	0.519691	0.177009	0.893453	-0.08478	-1.54323		0.37299	0.459967	0.156922	-0.0639686	-0.140892	0.118245	-0.0801252	-0.080409	-0.133602	0.0376767		-0.333784	-2.12961	-0.351199	-0.11557
	S100B	0.74494	-0.522437	0.639056	0.109202	-0.031934	-0.0600861	0.116967	-0.0604	-0.00288607	0.25224		1.77983	-0.33551	0.0965791	-0.19261	0.147745	0.333185	-0.416835	0.512046	0.876382	0.0982688		0.139142	0.0189392	1.53702	0.409911	1.21826	0.746681	0.532385	1.20138	1.1761	0.846674		-0.363925	-0.0795509	-0.152937	-0.0374181	-0.139012	-0.040344	0.0542941	-0.00614814	-0.263687	-0.218452		0.604704	-0.726049	0.194999	0.519632
	POU2AF1	0.00873368	-0.00913248	-0.139762	-0.0194181	0.076961	-0.0676586	0.126294	0.180884	-0.524729	1.5063		-0.0727594	2.6174	-0.0175443	0.046957	0.198851	-0.0676586	0.191891	0.289835	-0.45707	0		-0.131028	0.233994	-0.139762	0.0190482	0.0198026	0.0633696	0.175891	0.0504309	-0.485508	0		0.0595921	2.13685	-0.139762	-0.0292704	0	-0.047856	0.11493	-0.14842	-0.524729	0		0.138999	1.08334	0.126294	-0.0284379
	RELA	0.159348	0.198155	0.379154	0.0634873	0.160592	-0.167426	-0.0613005	0.176962	0.194134	-0.112927		-0.300991	-0.158594	0.2209	0.132324	0.241896	-0.0860668	0.276957	0.184898	0.216069	-0.244929		0.0653275	-0.054284	0.0964176	-0.0736881	0.0118919	-0.0310359	-0.0048254	-0.047472	0.0415286	-0.283278		0.0342588	-0.113827	-0.0128414	-0.0134388	-0.00836201	-0.0932268	-0.381587	-0.0710835	0.0092604	-0.141852		0.307928	-0.0156564	0.000964914	0.0766564
	TBK1	0.144892	-0.0387116	-0.108727	0.0811149	0.0972518	0.13619	0.320785	0.0826723	-0.147222	0.0360708		0.0415519	-0.0241698	-0.0416155	-0.028809	-0.214985	-0.0743301	-0.0731494	-0.255308	-0.285175	-0.0198875		-0.0505147	-0.0833816	0.0430918	0.204112	-0.178051	0.078871	-0.0956591	-0.133291	-0.110224	-0.00770117		-0.0568081	-0.078621	-0.032286	-0.0128524	0.0196032	0.00539464	0.243644	-0.0896831	-0.28267	0.118627		-0.0339623	0.0562398	-0.0603178	-0.0343042
	REL	0.138571	0.197959	0.0107405	-0.0813688	-0.0930972	-0.36041	0.324776	-4.4485e-05	-0.151707	0.150846		0.267291	-0.0233939	0.0362724	-0.0361215	-0.128447	-0.192	0.105073	0.10644	-0.406151	0.189057		0.595704	0.109443	0.0259324	0.416501	0.00632562	-0.296227	-0.257389	-0.184129	-0.329867	0.157521		0.293121	0.0648777	-0.00478509	-0.0790998	-0.0279403	-0.0730896	-0.158251	-0.0785147	-0.316659	0.194647		0.269051	0.523715	-0.177822	0.0284937
	RIPK2	-0.130078	-0.00804133	0.0169266	0.0556157	-0.0185959	-0.304893	0.137604	0.0321956	0.491429	-0.184285		0.125158	0.244184	0.0863146	0.0596224	-0.0368474	-0.112161	0.101758	-0.00873253	0.61106	0.133485		0.0615013	0.582666	0.65175	0.279799	0.603647	0.0901734	-0.0971382	0.0315209	0.834974	-0.323603		-0.081255	0.12895	-0.0242177	-0.016799	0.0639607	0.105731	0.0406404	-0.0194553	0.625085	0.075621		0.70346	0.282216	-0.102815	-0.0844889
	LRP1	-0.0606066	-0.161742	0.204866	0.0650395	-0.260011	0.575346	-0.126768	0.04542	-0.503274	0.0789769		0.0547202	0.0572025	0.190171	0.256529	0.86154	0.539943	0.217251	0.767343	0.194627	0.194009		-1.53114	-0.966166	-0.479195	-0.318308	-0.353943	-0.356428	-0.404177	-0.740761	-1.36684	-0.926808		-0.0417301	-0.0665329	0.0673703	-0.00139972	-0.124379	0.0657936	-0.306038	-0.0452732	-0.473471	-0.0804126		0.385681	-0.853287	-0.134356	0.408995
	CHUK	0.0907106	-0.0106383	-0.00496033	0.0413476	-0.0799175	-0.095661	-0.0684164	0.0730733	-0.15686	0.00776185		0.194609	0.172588	0.0742934	-0.00555284	-0.0312071	-0.0221638	0.194215	0.228845	0.0394117	-0.0216784		0.280132	0.204772	0.207029	0.267825	0.0997226	0.0251707	0.230586	0.105938	0.101782	0.311583		0.0354089	0.114834	0.127794	0.0590463	0.0610407	0.0400585	0.204996	-0.00651915	-0.0918288	0.195763		0.051591	0.227568	-0.0274652	0.0673826
	S100A8	0.00873368	-0.00913248	-0.139762	-0.0194181	0.076961	-0.0676586	1.22491	0.180884	-1.77834	0.254642		-0.0727594	0.0531098	-0.0175443	0.046957	0.198851	-0.0676586	1.69656	0.289835	-1.71068	0		-0.131028	-0.0953102	-0.139762	0.0190482	1.5217	0.0633696	0.175891	0.0504309	-1.73912	0		0.0595921	0.119801	-0.139762	-0.0292704	0	-0.047856	0.11493	-0.14842	-1.77834	0		0.138999	-0.0953102	0.126294	-0.0284379
	NOD1	0.356717	-0.0435161	-0.115244	0.112516	0.20542	-0.492993	0.00535523	-0.120898	-0.141533	-0.09807		0.103536	0.117037	0.161445	0.350519	0.202399	-0.0737848	-0.254892	-0.920462	-0.286996	0.0692214		-0.563409	-0.0144532	-0.0352057	0.220611	0.240778	-0.344372	-0.720721	-0.476594	-0.504683	-0.557926		0.0509111	0.0197987	0.0354005	0.254531	0.0646432	0.0120374	0.00532055	-0.0729183	0.132975	0.109803		-0.11111	0.111883	-0.102067	-0.117011
	S100A12	0.00873368	-0.00913248	-0.139762	-0.0194181	0.076961	-0.0676586	0.126294	0.180884	-0.524729	0		-0.0727594	0.0531098	-0.0175443	0.046957	0.198851	-0.0676586	0.191891	0.289835	-0.45707	0		-0.131028	-0.0953102	-0.139762	0.0190482	0.0198026	0.0633696	0.175891	0.0504309	-0.485508	0		0.0595921	0.119801	-0.139762	-0.0292704	1.77834	-0.047856	0.11493	-0.14842	-0.524729	0		0.138999	-0.0953102	0.126294	-0.0284379
	SBNO2	0.411895	0.282374	0.15478	0.111085	-0.148199	-0.567182	-0.172471	-0.254099	-0.457337	-0.0486875		-0.0290138	-0.0424665	0.209944	0.29375	0.235537	-0.120826	-0.113004	-0.173283	-0.126704	0.145265		-0.559438	-0.136172	-0.439441	-0.808367	-0.24935	-0.163844	-0.286577	-0.437164	-0.106326	-0.244822		0.0900413	-0.00964956	0.0848512	0.131194	0.0365883	0.00495662	-0.0923423	-0.0390337	0.0285638	-0.0243716		0.0908788	0.164851	0.108404	0.0387212
	IKBKB	0.0787225	-0.0748883	-0.046794	-0.0358117	-0.0110259	-0.0992084	-0.0531192	-0.194102	-0.499396	0.184108		-0.131121	-0.128839	0.11444	-0.0358439	-0.147432	-0.0973144	0.0239309	-0.165282	-0.207585	0.215355		-0.536187	-0.310689	-0.356778	-0.04047	-0.426341	-0.385783	-0.182847	-0.302827	-0.657392	-0.175176		-0.202695	-0.172557	0.10676	0.0186007	0.008793	-0.0256088	0.142165	0.0113561	-0.39065	0.201476		0.108252	-0.101045	0.208661	0.0316665
	NFKB1	-0.225586	-0.266245	-0.113002	0.0712707	-0.179581	-0.101816	-0.0808936	0.0155326	0.14074	-0.036106		-0.0253728	-0.195603	-0.209377	-0.0994648	-0.0913696	-0.327529	-0.340065	-0.133035	-0.0714335	0.00564109		-0.634581	-0.0262934	-0.540201	0.0205554	0.324859	-0.354255	-0.688996	-0.355267	-1.10118	0.0295334		0.0460708	-0.0824562	-0.137246	-0.0184948	-0.0296598	0.0381723	0.107195	0.0819266	0.0780977	-0.0652086		-0.23076	-0.0459921	-0.081246	0.173717
	ANP32B	-0.106658	0.0819986	-0.308378	0.0133938	-0.0267401	-0.182673	-0.0363597	-0.0265508	-0.695951	-0.210648		-0.456498	-0.148852	0.00102504	0.0581652	-0.286954	-0.17066	-0.0651088	-0.424324	-0.659031	-0.124888		-1.11102	-0.373758	-1.10647	-0.748898	-0.466802	-0.652262	-0.304202	-0.547566	-1.15473	-0.861027		-0.0742781	0.0410145	-0.0707797	-0.00322051	0.0825166	-0.0429322	-0.025542	-0.0204888	-0.361094	-0.00933653		-0.577428	0.0677498	-0.372706	-0.342853
	CRP	0.00873368	-1.26449	-0.139762	-0.0194181	0.770108	-0.0676586	-1.6644	0.180884	-0.524729	-0.433492		-0.0727594	-1.20225	-0.0175443	0.046957	0.198851	-0.0676586	-1.5988	0.289835	-0.45707	0.268658		-0.131028	0.274644	-0.139762	0.712195	0.0198026	0.0633696	-1.6148	0.0504309	-0.485508	-1.78675		0.0595921	0.738725	-0.139762	-0.0292704	1.59737	-0.047856	-1.67576	-0.14842	-0.524729	-1.78675		0.138999	-1.35067	0.126294	-0.0284379
	PLA2G1B	0.00873368	-1.57014	-0.139762	0.238581	0.775121	-2.01357	0.187055	-0.756619	-0.524729	-0.148956		-0.0727594	-2.20105	-0.0175443	-2.43715	-0.489284	-2.01357	-0.706874	0.191476	-0.45707	0.768371		0.294239	-2.02016	-0.139762	-0.161529	1.46942	-1.88254	-0.198001	-0.298127	-0.485508	-0.806476		0.0595921	-2.13436	-0.139762	-1.0126	2.00717	-1.99377	-0.12953	-0.859589	-0.524729	-0.806476		0.138999	-0.0732276	-1.66044	-1.97435
	MEFV	0.930228	0.0265092	-1.49283	-0.712565	-1.86465	-1.16627	0.126294	0.180884	-0.745755	-0.484073		2.06508	-0.761948	-2.46253	-0.133531	-1.74276	-0.774229	0.191891	0.289835	-1.9618	-0.502883		-0.131028	0.241114	-1.19846	1.11871	-0.419916	0.572439	0.175891	0.0504309	-0.378883	-0.349184		0.0595921	-0.979711	-1.26834	-1.12788	-1.94162	-1.14647	0.11493	-0.14842	-2.02946	-2.3466		0.138999	-0.524802	-0.972319	-1.12705
		Log2(Treated/Ctrl)
		-4															4
		-4	-3.5	-3	-2.5	-2	-1.5	-1	-0.5	0	0.5	1	1.5	2	2.5	3	3.5	4
[truncated: 3 more columns]

## Sheet: 9-TNF_TNFR-related genes
		Supplementary Table S4. Sheet #9. Modulation of immune-related genes belonging to 21 functional classes by epigenetic drugs. Ten melanoma cell lines were treated with the indicated drugs and then gene modulation was evaluated by the Nanostring Cancer immune panel. The 731 genes were grouped into the indicated functional classes (sheets 1 to 21 of this file). Extent of modulation is shown as Log2(…
		9-TNF/ TNFR-RELATED GENES
		GUADECITABINE											GIVINOSTAT											JQ1											GSK-126											ABEMACICLIB
	Gene symbol	VRG100	BRM17	FRN39	CST30	BNV13	MNT59	GRD43	GML41	CPN20	SLN91		VRG100	BRM17	FRN39	CST30	BNV13	MNT59	GRD43	GML41	CPN20	SLN91		VRG100	BRM17	FRN39	CST30	BNV13	MNT59	GRD43	GML41	CPN20	SLN91		VRG100	BRM17	FRN39	CST30	BNV13	MNT59	GRD43	GML41	CPN20	SLN91		VRG100	BRM17	CST30	MNT59
	TNF	1.57202	2.93675	2.01066	1.68711	0.773447	5.90261	3.12146	0.180884	2.6678	0.141314		0.985427	1.4394	-0.425904	0.046957	-0.896423	0.83656	1.00341	0.289835	0.231393	0.149036		1.42181	4.10968	-0.548121	0.0190482	3.17736	0.756517	-0.517257	0.0504309	-0.485508	-0.806476		0.184434	0.119801	-0.548121	-0.0292704	0.837696	-0.047856	-0.578217	-0.14842	-0.524729	-0.806476		1.42567	-0.0953102	1.73912	-0.0284379
	TNFRSF10C	0.47973	0.378921	3.86119	1.78179	1.36242	4.74176	1.09712	0.180884	0.668694	0.377809		0.112728	-0.595506	-0.0175443	0.567955	-0.709342	-0.0676586	-0.281114	0.289835	-0.0348217	0.139783		-0.739893	-2.98892	-0.139762	-2.37797	0.283154	0.756517	-4.27764	0.0504309	-3.64314	-3.71503		0.0774935	0.0520363	0.486176	-0.29031	-0.231714	-0.047856	-0.234396	-0.14842	0.168002	0.331694		-0.060404	-0.477304	0.777019	1.07017
	TNFSF10	-0.407122	0.96504	0.460362	2.65541	-0.11746	-0.16472	0.531972	1.28189	4.62422	0		0.649826	0.728987	0.67225	3.9692	0.327202	-1.45395	0.38494	2.43255	2.02394	0		-4.65785	-0.278093	-4.0441	0.0190482	-1.18043	-1.32292	-0.937668	0.0504309	-0.485508	0		0.192264	0.190904	0.293318	2.3188	-0.0412596	-1.43415	-1.02119	0.216223	-0.524729	0		-1.45238	-1.13835	0.126294	-0.721585
	TNFSF11	0.00873368	1.93151	0.209653	0.512363	0.076961	0.657692	1.7346	2.12782	2.06546	0.0368463		-0.0727594	0.304796	-1.27155	-1.56248	0.198851	-0.773615	0.191891	2.96687	-1.37454	0.527311		-0.131028	-1.66292	-1.39377	-1.59039	0.932164	-1.64138	0.175891	3.46412	-1.40298	-1.31641		2.13903	0.120056	0.329	-0.390198	2.38509	-2.44575	0.11493	0.216223	-0.482852	-1.31641		0.138999	-1.99693	0.466391	-2.42633
	TNFRSF1B	0.90212	1.34512	1.08164	0.884307	0.279671	4.17381	0.653766	0.677399	0.328779	1.95258		1.53757	0.782823	-0.0898893	0.85872	0.87938	1.64614	0.763169	1.73836	-0.161791	1.00753		1.0602	1.21494	0.0757038	0.677562	0.964486	0.467372	-0.872205	-0.236389	-1.60669	0.387447		-1.19066	0.490562	0.388357	0.485772	-0.0253091	1.2084	-0.224912	-0.000329001	-0.736149	1.33887		-1.11125	-0.568725	-0.429462	0.664709
	CD70	0.205162	0.91943	2.62457	0.28668	-0.208985	1.44637	2.20503	0.16749	0.981569	0		0.439332	1.90609	1.26067	0.500087	1.31198	0.729849	0.191891	2.37987	2.17864	0		0.336037	2.37836	-1.05779	0.562736	-0.234511	-0.629778	0.175891	-2.96561	-0.485508	0		-0.297732	0.119528	2.13104	0.0784855	-0.157875	-0.741003	0.11493	-1.00567	-0.524729	0		-0.679186	0.729947	-0.398316	-0.721585
	TNFRSF18	0.130875	1.74722	0.404459	0.896873	-0.0515578	1.9161	1.26138	0.365953	0.590714	0.25766		0.824729	0.663167	0.175258	0.046957	-1.87558	2.29367	1.41406	2.52014	0.845216	-0.368221		-0.79263	0.271269	-0.388639	1.81238	-0.804668	2.0074	-0.411183	-1.05032	1.28159	0.462348		0.0240208	0.0674413	0.0543053	-0.0292704	0.397055	1.82771	-0.0647761	-2.16217	0.297641	-0.186796		0.430884	0.557887	0.823669	1.35786
	TNFRSF17	2.53828	-0.00913248	2.5616	-0.0194181	0.076961	0.752121	-0.315251	0.180884	-1.77834	1.64453		1.94089	0.0531098	1.36875	0.046957	0.198851	0.143412	-0.430289	0.289835	-1.71068	0.402484		2.00077	2.17785	1.24653	0.0190482	2.54239	1.44747	-0.382809	0.0504309	0.460243	0.954824		0.0595921	0.119801	1.98847	-0.0292704	1.08519	-0.741003	-2.52321	-0.14842	-1.77834	1.60496		0.138999	2.35483	1.92087	1.35786
	TNFSF15	-0.171843	0.602707	0.444898	0.488363	0.890463	2.57745	-0.315251	1.88687	0.758979	-0.000705467		0.530055	0.480237	0.193281	-0.369183	0.250843	1.24067	-0.0941193	2.86265	0.924541	-0.808113		-3.16845	0.754674	-0.415015	-1.1243	-0.716869	1.31488	-2.46225	-0.305355	1.12585	-1.98914		-0.0234805	0.773512	0.270595	-0.0101078	0.136096	1.2091	-2.52321	-1.09641	-0.524729	0.418543		0.0475342	0.695933	0.174493	0.664709
	TNFRSF13C	1.36145	0.585231	-0.468037	0.0282768	0.812817	-0.0585103	1.5538	0.197504	0.120221	0.240917		1.12691	0.376762	0.0151806	-0.35287	0.0405128	-0.0609896	0.274223	-0.951686	-0.327791	-0.0363804		0.186941	0.366086	-0.532251	1.01313	-0.985477	-0.604666	-1.6148	-1.02344	-0.638244	-0.198669		1.24533	0.45646	0.189952	0.334707	0.51768	-0.0871175	0.0305448	-0.473749	0.280475	0.339192		-2.10952	1.15496	-0.704649	-0.749871
	TNFSF4	0.109218	0.410055	0.833944	0.28051	-0.0430855	3.20693	1.02277	0.66624	0.40798	0.525901		-0.262158	0.23838	0.263441	0.508845	0.134966	0.571207	0.926048	1.37625	0.428336	0.166015		-0.277202	0.280183	-0.691132	0.576103	-2.04668	0.672031	-0.869833	0.809248	0.526352	0.22853		0.489525	0.107195	0.208313	0.00966543	0.0548093	0.146536	-0.198725	0.456116	-0.15541	0.207494		0.428093	0.0309963	0.343607	0.898233
	TNFSF13	0.371141	0.172341	0.726854	-0.235999	0.445885	1.62796	0.471182	0.511601	0.758979	0.807751		0.252061	-0.414574	-0.0129917	-0.0590414	0.405873	0.83656	0.222389	0.480043	-0.45707	-0.0382212		-2.3975	-1.16668	-3.58421	-2.33724	-2.77676	1.85367	-1.04713	0.163822	0.207639	-2.41591		-0.149187	-1.23913	0.0100809	-0.233697	0.190011	-0.047856	-0.700723	0.18044	-0.524729	-1.61391		0.267764	-0.683864	-0.113599	1.581
	TNFRSF8	1.26522	-0.00913248	-0.139762	-0.0194181	0.998264	-0.760806	-0.114466	0.180884	-0.932164	2.26799		-0.0727594	0.0531098	-0.0175443	0.046957	-1.18243	-0.760806	0.157419	0.289835	-0.864505	0.620576		0.701881	-0.0953102	1.93843	0.0190482	1.2383	1.31488	-1.7691	2.18663	1.41156	0		0.0595921	0.119801	-0.139762	-0.0292704	0.551688	-0.741003	-2.52321	-0.14842	-0.932164	0		0.138999	-0.0953102	0.126294	0.887853
	TNFSF13B	0.393577	0.304991	0.805295	0.255738	-0.0209033	0.383163	0.308833	0.268864	0.202501	0.675473		-0.0139128	0.119163	0.189433	0.693325	0.27482	0.711837	1.0277	0.202759	-0.179936	0.411902		0.635053	-0.370948	0.670183	-0.87768	-2.23316	-1.31553	-1.065	-1.78827	-0.0174558	0.240308		0.0703302	0.119874	0.50282	-0.410465	0.0226767	-0.190619	-0.445757	-0.148777	0.0608617	0.426135		0.943194	-0.367613	0.0921637	-0.693011
	TNFRSF9	2.19853	3.2884	-0.139762	-0.0194181	-1.01831	1.22295	-0.384833	0.180884	-0.932164	0		1.2641	0.0531098	-0.0175443	0.046957	1.50519	-0.760806	-2.11005	0.289835	-0.864505	0		-1.30951	6.38784	-0.139762	0.0190482	4.76958	-0.629778	-2.12605	0.0504309	-0.892943	0		-1.25865	0.119801	-0.139762	-0.0292704	1.45651	-0.741003	-2.18701	-0.14842	-0.932164	0		0.930277	2.08058	0.126294	-0.721585
	LTA	2.95065	-0.667292	0.464649	1.48466	-0.611174	1.31237	-0.160947	0.180884	0.0229072	-0.599056		1.92536	0.337144	-1.89135	0.046957	-0.774237	-1.24288	-0.0398198	1.99751	-0.258582	-2.10535		-1.40731	-0.33701	0.182544	2.72836	-0.0423412	0.621104	-0.228505	1.55086	-0.591995	0.661595		0.555263	0.0427275	-0.290802	2.49289	0.397055	-0.332275	0.37359	0.216223	-0.366063	-0.456694		1.03929	1.04173	2.6945	-0.31612
	TNFSF18	2.26414	1.09253	-0.139762	-0.0194181	0.076961	-0.0676586	0.126294	0.180884	-0.524729	0		-0.0727594	2.13147	-0.0175443	0.046957	0.198851	-0.0676586	0.191891	0.289835	-0.45707	0		-0.131028	-0.0953102	-0.139762	0.0190482	0.0198026	0.0633696	0.175891	0.0504309	-0.485508	0		0.0595921	0.119801	-0.139762	-0.0292704	0	-0.047856	0.11493	-0.14842	-0.524729	0		0.138999	-0.0953102	0.126294	-0.0284379
	TNFRSF4	0.451251	0.340393	0.0176116	-0.189079	-0.378622	-0.375341	0.225374	1.89894	0.291888	0.352224		-0.163433	-0.388351	-0.25021	-0.0804733	-0.229191	-0.620661	0.0619471	0.805298	-0.622713	0.0415461		-1.92489	-0.243239	0.242192	0.553412	-0.100922	0.482217	-0.178098	1.4255	0.517547	0.745934		-0.0975277	-0.606331	-0.410915	0.175977	-0.122179	0.344952	-0.344889	0.932663	-0.0598857	0.0669234		0.229872	0.32487	-0.0522971	-0.21093
	TNFAIP3	0.452502	0.217562	0.284173	0.283267	0.114691	0.477027	0.32276	0.245733	0.181181	-0.271016		-0.168481	0.0920247	-0.154139	0.334184	-0.130121	0.242215	0.677685	0.236166	-0.0649392	-0.0493849		-1.1386	0.946009	-0.59852	-0.375118	-0.0617462	-0.587906	-1.29186	0.128099	-1.42557	-1.65317		0.0661705	0.0371798	0.1245	0.0112707	0.0162195	-0.0873973	-0.0819476	0.0397237	0.323786	-0.0727868		1.37167	0.222606	0.251039	0.247541
	TNFRSF12A	0.0156142	-0.0264352	-0.0483392	0.4024	-0.0323577	0.302319	0.378924	0.363207	0.826784	-0.504844		0.754663	-0.035219	0.0252295	0.23367	0.322261	-0.479214	0.650519	0.982825	-0.173424	-0.603209		1.77053	0.507052	0.947017	0.899802	1.06593	0.0919868	1.08705	0.678758	1.4996	0.112885		0.234354	0.0587722	0.085217	-0.319821	-0.0782735	-0.142876	-0.463558	0.205589	-0.00300865	-0.379825		1.58109	-0.155468	1.06421	-0.126839
	TNFSF14	0.417093	-0.00913248	0.548373	-0.0194181	0.770108	-0.0676586	0.349911	-0.224581	-0.524729	0		-0.0727594	0.0531098	-0.0175443	0.046957	0.198851	-0.0676586	1.67016	-0.11563	-0.45707	0		-0.131028	-0.0953102	-0.139762	0.0190482	0.932164	0.0633696	0.988425	-0.355034	-0.485508	0		0.0595921	0.119801	-0.139762	-0.0292704	0.678034	-0.047856	-0.0161816	-0.553885	-0.524729	0		0.138999	-0.0953102	0.126294	-0.0284379
	CD27	0.00873368	1.37945	1.46366	-0.0194181	0.076961	-0.0676586	-1.48186	0.180884	-0.524729	0		1.79759	0.0531098	0.675603	0.046957	0.198851	0.324383	-1.41626	0.697448	-0.45707	0		-0.131028	2.49994	-0.139762	0.0190482	1.88858	1.85367	-1.43226	0.0504309	-0.485508	0		0.0595921	2.64811	2.27615	-0.0292704	1.59737	-0.047856	-1.49323	-0.14842	-0.524729	0		0.138999	1.70144	0.126294	-0.0284379
	TANK	-0.133748	0.0612916	0.314989	0.0417347	-0.0714668	0.183996	0.209799	0.0926648	0.17969	0.0358638		0.22621	0.188948	0.107985	0.0805801	0.220569	0.0770522	0.223148	0.464774	0.30423	0.112777		-0.515666	0.0236432	0.24756	-0.00939429	0.157307	0.100917	0.036631	-0.0578535	0.178376	0.220968		0.0321668	0.042842	0.0275257	-0.0089354	0.0622636	0.00267056	0.115977	-0.0187911	0.126123	0.130984		0.288778	0.0105899	-0.178199	0.12517
	TNFRSF1A	0.0926543	0.047462	0.400397	0.124083	-0.0878636	-0.0503645	-0.0316412	0.0254106	0.146219	-0.0583656		-0.227251	0.0430626	-0.0162261	0.0260263	0.0674728	-0.0221885	-0.0805982	0.294795	-0.262405	-0.0999196		-1.03119	-0.182901	-0.105877	-0.805274	-0.0274254	-0.214926	-0.272	-0.47927	-0.362509	-0.224812		-0.108644	-0.0357643	-0.149292	0.0333741	-0.0519915	-0.1309	-0.0402373	-0.0454478	-0.266089	-0.125274		-0.0817629	-0.125211	-0.164201	-0.13728
	TNFRSF11A	0.00873368	-0.0154349	0.192539	0.146333	-0.444068	1.08922	0.372987	-0.279372	0.15504	0.182613		1.1773	0.186181	-0.0896867	0.75853	0.736311	2.90199	1.00696	2.01027	1.04407	0.912439		-0.131028	-0.0113977	-0.524061	-0.944396	0.166041	-0.629778	-0.850272	-0.726895	0.289796	-1.84253		0.0595921	0.211428	-0.0557744	-0.172838	-0.103687	1.5655	-0.460446	-0.14645	0.58733	0.356325		0.138999	0.199619	-0.563172	0.664709
	TNFRSF10B	0.294859	-0.00816267	0.376236	0.105487	-0.00733058	0.122995	0.114472	-0.00429896	-0.258965	-0.307697		0.00992936	0.0899722	0.148918	0.063782	-0.0141571	-0.0389019	-0.186716	0.0274471	-0.11759	0.180656		-0.325189	-0.0307994	-0.1099	-0.650465	-0.00530533	-0.199719	-0.382048	-0.0752474	-0.179075	-0.418104		-0.0381348	-0.200814	0.147794	0.0859534	0.0028451	-0.124143	-0.135032	-0.0635548	-0.0149093	0.0860858		0.412655	-0.222025	-0.0711883	-0.0550249
	LTBR	-0.0263112	0.0555824	0.372737	0.0406507	0.130655	-0.172005	-0.286344	0.0387394	-0.00575355	-0.1199		-0.256998	-0.0983054	0.066645	0.0942787	0.115774	-0.0994667	-0.4128	-0.110515	0.0918583	-0.163278		-1.10417	-0.476114	-0.326496	-0.679191	-0.474871	-0.446318	-0.692255	-0.664933	-0.392122	-0.504557		0.0573204	0.0561912	0.0770174	0.0585785	0.0398501	0.0212841	-0.0641627	0.0504243	0.147056	-0.0646029		0.379876	0.0488314	0.243664	0.0114725
	TNFRSF13B	0.00873368	-0.00913248	-0.139762	-0.0194181	0.076961	-0.0676586	0.126294	0.180884	-0.524729	0		-0.0727594	0.0531098	-0.0175443	0.046957	0.198851	0.324383	0.191891	0.289835	-0.45707	0		-0.131028	0.741937	-0.139762	0.0190482	0.0198026	0.0633696	0.175891	0.0504309	-0.485508	0		0.0595921	0.119801	-0.139762	-0.0292704	0	-0.047856	0.11493	-0.14842	-0.524729	0		0.138999	0.233994	0.126294	-0.0284379
	TRAF6	0.0803841	-0.08809	-0.0761621	-0.0819292	-0.103541	0.183111	0.138392	0.104533	-0.219736	-0.112313		0.0593706	0.0152938	-0.0122537	0.0331288	0.0446678	-0.138169	0.215261	0.175679	-0.354933	0.0631138		0.132517	0.160472	0.0458384	0.348307	-0.0359417	-0.0118573	0.176708	0.0780092	0.000946473	0.300495		-0.031586	0.193653	0.0662745	-0.101965	0.0291907	-0.014124	0.0787363	-0.0457824	-0.0292088	0.0400274		0.268662	0.224979	0.0923845	0.0102125
	TRAF2	-0.0382792	0.136035	-0.307241	-0.155441	0.10377	-0.234321	-0.0441063	-0.0815779	0.109763	-0.1754		0.0722034	0.0794368	-0.080589	-0.0695596	-0.0567004	-0.0288507	-0.0764968	-0.18398	0.019358	-0.121507		-0.193445	-0.0257624	-0.260259	-0.00262271	-0.14395	-0.27941	-0.632115	-0.380463	-0.1821	-0.345058		-0.00296132	-0.10919	-0.00854807	-0.178642	-0.0101724	-0.0668228	-0.120275	-0.0766901	0.109175	-0.0483553		-0.272771	-0.0771422	-0.107209	-0.198439
	TNFRSF14	-0.202606	-0.127797	-0.0784562	-0.00367426	0.0458533	-0.500247	-0.119842	0.0440625	-0.627356	0.388335		0.454891	-0.337848	0.0342555	-0.0766924	-0.181093	-0.0547148	-0.06134	-0.435604	0.0191059	0.231959		-4.22108	-0.938572	-0.314313	-0.672153	-0.853439	0.258168	-0.456003	0.142688	0.135342	-0.869039		0.261819	0.134166	-0.0102782	0.0720325	-0.0471851	0.00430545	0.235492	0.0215006	-0.0345005	0.312044		0.0308774	0.399909	0.102778	0.118918
	TRAF3	0.196164	0.13771	-0.446711	-0.0192194	-0.0400229	-0.707244	-0.264078	-0.196387	-0.126663	-0.152995		0.356461	-0.0220122	-0.0747405	-0.0662115	-0.0215102	-0.143115	-0.127921	-0.0883107	0.00749058	-0.115598		0.181146	-0.0814577	-0.920654	-0.445199	-0.102837	-0.405375	-1.01601	-0.539986	-0.74874	-1.01668		0.112138	-0.0491847	-0.00509197	0.0554882	0.0668143	-0.00376634	-0.157144	0.018736	0.296986	0.0547437		0.41333	-0.00156579	0.179315	-0.15637
	LTB	0.015545	-0.00913248	-0.520039	-0.0194181	0.0819736	0.752672	0.819953	0.180884	-1.03399	-0.503258		0.0805432	0.0531098	-0.498147	0.046957	-1.18243	0.442166	-0.047874	0.289835	-1.00989	0.435397		-1.59366	-0.0953102	0.226964	0.0190482	0.886712	1.31425	-0.382809	0.0504309	-0.553328	0.477848		-0.167251	0.119801	0.109777	-0.0292704	0.80252	-0.513946	-1.4227	0.722873	-0.280959	-0.108942		0.504733	0.233994	0.126294	-0.31612
	TNFRSF11B	-0.904042	-0.00913248	1.41395	-1.00025	-0.085467	1.1713	-2.5809	0.180884	0.197133	1.35325		0.516444	0.0531098	0.746441	-1.33934	1.00977	-1.6771	-1.59796	0.289835	0.925036	1.57485		-1.0438	-0.0953102	0.064622	-1.36725	1.41749	0.244228	-1.14501	0.0504309	0.460243	0		-0.853184	0.119801	-0.00401338	-0.501256	0.37087	-0.0439421	-2.59227	-0.14842	-0.308161	0		2.90185	0.233994	0.53458	0.664709
	TNFSF12	-0.000138571	-0.413074	-0.176635	0.136216	-0.169117	-0.724767	-0.420812	-0.204578	-1.08955	0.372035		0.26054	-0.393537	0.0557943	-0.110251	-0.18793	-0.378368	-0.0565842	-0.153412	-0.670566	0.00681821		-2.75297	-2.37117	-3.11463	-3.86716	-1.86582	-1.65296	-1.83291	-1.08184	-2.47247	-1.36821		-0.0807704	0.131754	-0.133246	0.0722633	0.0446642	-0.0683718	0.0676002	-0.0737172	-0.483129	0.0372123		-0.0877044	0.112494	0.0103068	0.134243
	TNFSF8	0.115311	-0.999132	-0.0614728	-0.0445208	-0.706941	-0.990803	0.280706	0.180884	-0.684582	-0.198663		0.539305	-1.40804	-0.562617	0.48757	-0.804104	-0.839351	1.47011	0.289835	-1.29079	0.238959		-0.85349	-0.382121	-0.19899	-0.215577	-0.23578	0.121344	0.464642	1.55086	-1.09026	-1.70274		-0.579488	-0.42248	-0.15826	-0.373819	0.589308	-0.51453	0.341045	-0.14842	-0.933645	-0.361567		-0.238304	-0.323316	-0.17556	0.289869
		Log2(Treated/Ctrl)
		-4															4
		-4	-3.5	-3	-2.5	-2	-1.5	-1	-0.5	0	0.5	1	1.5	2	2.5	3	3.5	4
[truncated: 3 more columns]

## Sheet: 10-Type I_II_III IFN genes
		Supplementary Table S4. Sheet #10. Modulation of immune-related genes belonging to 21 functional classes by epigenetic drugs. Ten melanoma cell lines were treated with the indicated drugs and then gene modulation was evaluated by the Nanostring Cancer immune panel. The 731 genes were grouped into the indicated functional classes (sheets 1 to 21 of this file). Extent of modulation is shown as Log2…
		10-TYPE I-II-III IFN GENES
		GUADECITABINE											GIVINOSTAT											JQ1											GSK-126											ABEMACICLIB
	Gene symbol	VRG100	BRM17	FRN39	CST30	BNV13	MNT59	GRD43	GML41	CPN20	SLN91		VRG100	BRM17	FRN39	CST30	BNV13	MNT59	GRD43	GML41	CPN20	SLN91		VRG100	BRM17	FRN39	CST30	BNV13	MNT59	GRD43	GML41	CPN20	SLN91		VRG100	BRM17	FRN39	CST30	BNV13	MNT59	GRD43	GML41	CPN20	SLN91		VRG100	BRM17	CST30	MNT59
	IFI27	0.192801	-0.408047	4.19766	1.51084	0.187066	1.41513	3.31664	0.14554	2.95501	1.75482		0.210672	-0.00324827	-0.0175443	0.131636	-0.718028	0.10212	-0.733234	-0.185698	0.948729	0.46004		-1.8224	-1.69795	-0.139762	-1.58873	-1.81768	-1.17161	-3.00136	-2.97684	0.1263	-0.558946		0.0235646	0.297229	-0.139762	-0.303357	-0.047181	0.165309	-1.04552	0.0385823	1.09567	0.143994		-0.922241	-0.810855	-0.725905	-0.712265
	IFITM1	0.307873	0.714197	1.46064	0.758933	0.280722	0.914975	1.75362	-0.0437474	3.67793	2.68555		0.00425232	0.166999	0.0977872	0.607104	-0.519939	-0.566618	-3.61392	-1.12056	-2.16236	0.113807		-3.19176	-1.89771	-2.43281	-3.67473	-3.21234	-4.33368	-3.62992	-3.66534	-2.19079	-2.19277		0.324538	0.771317	0.160857	-0.259871	-0.0159873	0.38533	-1.54913	-0.124408	0.116588	0.688112		-0.89349	-1.64846	-1.94851	-1.6504
	ISG20	0.471267	0.65609	1.75182	0.522559	-0.00211581	2.88579	0.98157	0.332399	0.259505	0.271596		-0.00763545	0.0644982	-0.0264172	0.732608	-0.101827	-0.0410491	0.827995	0.695351	-1.56137	-0.476655		-2.38505	-0.358168	-1.19372	-0.815833	-0.31807	-0.883493	-0.828553	-1.54086	-1.61392	-2.8318		-0.0881029	0.00686477	0.315588	0.163817	0.178346	0.178465	0.133497	-0.257285	-0.483206	0.0363524		-0.598815	-0.58598	-2.17283	-0.778697
	IFNL2	1.71743	1.90578	2.15681	1.99679	-0.323492	-1.45395	0.819441	0.180884	-0.946307	0.770605		-0.0727594	-0.866811	1.36875	1.55205	0.207953	-1.45395	1.10924	0.289835	-2.16236	1.17607		-0.131028	1.5089	-0.139762	0.0190482	-1.76694	-0.227241	0.175891	0.450416	-0.802098	-0.398776		0.0595921	1.64503	-0.139762	0.372889	0.598339	-1.43415	0.11493	-0.14842	-2.23001	-0.398776		0.138999	0.781516	1.22773	0.194706
	IFITM2	0.109355	0.116543	0.0843629	0.284938	0.00988971	0.642045	0.427156	0.0413546	4.16772	0.664328		-0.203997	-0.196662	0.127001	0.22002	0.334638	0.0546666	-0.649719	-0.698889	-0.45707	-0.19432		-3.11424	-0.561047	-1.5989	-2.00376	-0.864654	-2.39159	-1.7251	-3.30791	-0.485508	-2.83369		0.122538	0.241967	0.0266693	-0.0536558	-0.0689673	0.291948	0.167456	-0.0670492	0.0291566	-0.0181636		-0.586416	-0.988177	-0.786846	-0.3321
	IFNA7	0.4912	0.0479258	0.711898	2.42378	0.367982	0.936643	-0.566523	0.258131	0.139089	1.23927		0.404189	-2.08909	-1.72466	1.75254	-0.896423	2.36068	-0.542324	0.481069	0.232021	-1.31641		-1.04426	0.286614	-1.15373	2.65878	1.06229	3.35726	-0.92192	0.559236	0.208662	-1.31641		-0.433789	-0.148121	0.648803	2.40919	1.53084	-0.047856	-1.04552	-0.190682	-2.39699	0.465301		0.301549	0.549348	2.6945	1.581
	ISG15	0.174947	0.224905	0.666003	0.0793479	0.157701	1.08014	0.524441	0.0719159	1.9056	0.0339338		0.448831	-0.0726922	0.187095	0.055867	-1.28132	0.088129	-0.692456	-0.633636	0.694401	-0.0336182		-0.37001	-0.806196	-0.815355	-0.626068	-2.50106	-1.35315	-1.68512	-2.95159	0.671334	-0.331808		-0.0234913	0.626935	0.154151	-0.0557517	0.0610563	-0.273215	-0.186372	-0.115205	1.01687	-0.00929243		-0.235331	-1.05419	-0.273553	-1.33514
	MX1	1.20293	-0.240346	1.17794	0.255046	0.367535	-0.0563435	0.596041	-0.00252643	1.42709	0.117783		0.910842	-0.253415	0.127692	0.245448	-1.35591	-0.208427	-0.464913	-0.624876	-0.472958	-0.132165		-3.80444	-1.24902	-1.39023	-1.21719	-3.04454	-2.0827	-2.37012	-3.12052	-1.28904	-2.07657		-0.0582333	0.298878	0.0622415	0.103109	-0.0429014	-0.220299	-0.238798	-0.0774521	0.0293453	0.189572		-0.672864	-0.650639	-0.130609	-1.29427
	IFIH1	2.98293	0.00456583	0.227797	0.0687139	0.0577484	-0.0205958	0.200006	-0.0991767	0.189152	-0.0168198		2.06508	0.0295118	0.116452	0.19919	-0.262901	0.0772731	-0.00681276	-0.113316	0.08682	0.0993003		-0.131028	-1.16395	-1.08451	-1.17814	-0.822831	-1.0291	-0.823728	-1.77256	-1.15547	-1.44782		2.13903	0.1514	-0.201973	0.045552	0.0934936	-0.120141	0.22156	-0.12451	-0.0263243	-0.0452551		0.138999	-0.0384036	-0.0656977	-0.0891404
	IFI35	0.364459	0.154527	0.423605	0.119888	0.171662	0.0282373	0.178295	-0.0607435	0.496832	0.398441		-0.448182	-0.342959	-0.0469038	0.079281	-0.369298	-0.0759375	-0.258228	-0.106659	-0.372229	0.0363032		-1.57496	-0.0656959	-0.0376738	-0.326717	-0.496242	0.201794	-0.20018	-1.22162	0.320416	0.348708		0.037563	-0.0664727	0.0889496	0.114443	-0.0377708	-0.0511246	0.137635	-0.0873511	0.25411	-0.0388086		-0.940704	-0.398841	-0.375304	-0.763605
	IFNAR1	-0.129029	-0.104661	0.514608	0.0768501	0.0928582	0.487075	0.069356	0.241793	0.436931	0.0405476		-0.24026	-0.193021	0.0399099	0.0196959	0.236063	0.481509	-0.162519	0.388296	0.631827	0.0304779		-0.239758	-0.302735	-0.0684214	-0.0762059	0.133013	0.663488	-0.403964	0.23839	0.548299	0.136285		-0.0915363	-0.170241	-0.103158	-0.0519513	-0.0266348	-0.148914	0.0061926	0.0428654	0.31691	-0.0438416		-0.0985235	-0.0752057	-0.0248094	0.685085
	IFNG	1.71743	-0.571342	2.15681	-0.258799	-1.30432	-0.317953	-1.8187	0.24167	0.758979	0.65752		1.79759	-1.20225	1.59012	-0.193371	-2.28104	-2.01357	-2.03902	0.294518	-0.45707	0		0.294239	0.585193	-0.139762	-1.92686	-1.21013	0.0621157	-2.46225	1.32608	-0.485508	0		1.66903	-0.216044	-0.139762	-1.57302	-0.546924	-1.99377	-1.60578	-0.458686	-0.524729	0		0.138999	0.44608	-0.206794	-1.97435
	IFIT1	0.304333	-0.819402	0.678809	-0.100438	0.321994	-0.161263	0.000120286	-0.190946	0.458336	0.274102		1.28345	0.0226666	0.0340261	0.212538	-1.22575	-0.0492081	-0.77888	-0.667558	-0.17351	0.283718		-1.13255	-2.70065	-1.05918	-1.05347	-3.55271	-1.44563	-1.20956	-2.73589	-1.14313	-1.48989		0.193488	0.0523663	-0.0205859	-0.281874	0.0108386	-0.0236449	-0.243816	-0.0381669	0.282742	0.197186		-0.91815	-0.94978	-0.180207	-0.740312
	IFNAR2	-0.0326149	-0.0045671	0.117949	0.022995	0.0439944	-0.137621	0.091866	0.131678	0.0170264	0.1506		-0.0488339	0.119922	0.0840028	0.185148	0.551955	0.231148	0.374184	0.597416	0.0693567	0.241138		-0.281701	0.224296	0.400975	0.163486	0.0726986	0.105438	-0.0114771	0.0460538	-0.179464	0.461788		-0.0808835	0.0572497	0.0722335	0.000141546	0.00534221	0.0753347	-0.0612697	-0.0515348	0.00257731	0.103147		-0.451886	-0.163099	-0.21611	-0.215471
	IFNA17	0.00873368	0.684015	-0.139762	-0.0194181	0.076961	-0.0676586	0.126294	0.180884	-0.524729	0		-0.0727594	0.0531098	-0.0175443	0.046957	0.198851	-0.0676586	0.191891	0.289835	-0.45707	0		-0.131028	-0.0953102	-0.139762	0.0190482	0.0198026	0.756517	0.175891	0.0504309	-0.485508	0		0.0595921	0.119801	-0.139762	-0.0292704	0.678034	-0.047856	0.11493	-0.14842	-0.524729	1.78171		0.138999	-0.0953102	0.126294	-0.0284379
	IFNGR1	0.0362574	-0.117499	0.050364	0.0306404	-0.145379	0.137145	0.0694336	0.0085642	0.207134	-0.021291		0.0812673	-0.00796241	0.0613747	0.0224189	-0.0404152	-0.0166094	0.382411	0.416777	0.4229	0.127351		0.223703	0.120851	0.622366	0.19608	-0.0458349	0.351824	0.206832	0.224276	0.403571	0.417806		-0.00192754	0.0224768	0.00235672	-0.121825	0.0433654	-0.0154649	0.0751044	0.0197517	0.431021	0.127949		0.0707402	-0.0142357	-0.164147	0.427935
	IFNL1	0.62661	-0.265822	-0.221786	0.11688	-0.443992	-0.249522	-0.128857	0.458957	-0.375696	0.524472		0.0286082	-0.0520325	-0.521574	-0.0332531	0.184641	-0.270576	0.143053	0.968345	-0.369581	-0.0584		-0.0809951	-0.817141	-0.356224	-0.0726948	-0.16525	-0.438944	0.283472	0.440973	-0.297451	-0.269976		-0.396399	0.202336	-0.529875	-0.0662787	-0.358405	-0.371219	0.0366387	0.299959	-0.547737	-0.165811		0.693456	-0.239709	0.107517	-0.132089
	IFNA2	0.417093	-0.00913248	-0.139762	-0.0194181	0.076961	-0.0676586	0.126294	0.180884	-0.524729	0		-0.0727594	0.0531098	-0.0175443	0.046957	0.198851	-0.0676586	0.191891	0.289835	-0.45707	0		-0.131028	-0.0953102	-0.139762	0.0190482	0.425268	0.0633696	0.175891	0.0504309	-0.485508	0		0.0595921	0.119801	0.486176	-0.0292704	1.37372	-0.047856	0.11493	-0.14842	-0.524729	0		0.138999	-0.0953102	0.126294	-0.0284379
	MAVS	-0.0615562	-0.00402321	-0.00349153	-0.0256355	0.0133076	-0.0368329	-0.113517	-0.0767558	0.192337	0.0286756		-0.204183	-0.0862499	0.157485	0.022817	0.21596	0.132074	-0.286691	0.134208	0.242036	0.0656247		-0.226842	-0.179707	-0.171998	-0.1576	0.101119	-0.0957359	-0.0791497	-0.119011	-0.0166103	-0.0881081		-0.0275365	0.0805248	-0.0673749	-0.0157651	-0.00940783	-0.0453343	-0.0281246	0.0313885	0.269497	0.0209847		-0.0722406	0.0177755	-0.0211426	0.205515
	IFI16	0.571227	0.0258581	0.177559	-0.0322197	0.0269196	-0.241852	-0.0863463	-0.201045	-0.321824	-0.168544		-0.374215	-0.0236156	0.0140612	0.00893101	-0.208234	0.140545	-0.232926	-0.495328	-0.625449	0.0614365		-2.33106	-0.216194	-0.153234	-0.548247	-0.284966	-0.2433	-0.774372	-1.16485	-1.76183	-0.818554		-0.0105992	0.0859779	-0.0986078	-0.0322145	-0.0307221	0.0722689	0.108378	-0.00648268	-0.460045	0.134476		-0.339858	-0.215524	-0.193888	0.0166535
	IFNA8	0.00873368	-0.00913248	-0.139762	-0.0194181	0.076961	-0.0676586	0.126294	0.180884	-0.524729	0		-0.0727594	0.0531098	-0.0175443	0.046957	0.198851	-0.0676586	0.191891	0.289835	-0.45707	0		-0.131028	-0.0953102	-0.139762	0.0190482	0.0198026	0.0633696	0.175891	0.0504309	-0.485508	0		0.0595921	0.119801	-0.139762	-0.0292704	0	-0.047856	0.11493	-0.14842	-0.524729	0		0.138999	-0.0953102	0.126294	-0.0284379
	OAS3	0.246073	-0.0964214	-0.20706	-0.0328758	-0.134187	-0.332414	0.146803	-0.0838359	-0.282828	0.103932		0.318321	0.26102	0.140596	-0.131177	-0.930055	-0.189562	-0.23154	-0.553105	-1.23094	-0.741864		-3.57915	-0.979139	-2.56367	-1.09522	-1.77661	-1.85579	-1.82396	-2.77163	-2.67377	-1.86901		0.193909	0.161062	0.0835821	-0.118884	0.0689922	-0.0938562	-0.0115565	-0.0307266	-0.357324	-0.00457397		-1.31453	-0.205129	-0.910657	-1.47543
	IFIT2	0.362578	-0.483152	0.483166	-0.0958431	-0.225618	-0.386955	-0.333023	-0.253374	-0.155041	0.0475216		0.769107	-0.551177	0.30065	-0.108012	0.0433626	0.046987	-0.6206	-0.0694245	0.462223	-0.161014		-1.32423	-0.4968	-0.067607	0.0946507	0.19265	-0.101424	-1.06296	-1.15427	-0.0843128	-2.07961		0.323492	0.32731	-0.202128	0.0219942	-0.00834406	-0.096011	0.0110257	0.0263686	-0.141291	-0.0565102		0.290239	-0.0556441	-0.447018	0.194623
	IFNB1	0.00873368	-0.00913248	-0.139762	-0.0194181	2.1564	-0.0676586	-2.35754	0.180884	-0.524729	-0.398776		-0.0727594	0.0531098	-0.0175443	0.046957	0.198851	-0.0676586	-0.418924	0.289835	-0.45707	1.17607		-0.131028	-0.0953102	-0.139762	0.0190482	2.15756	0.0633696	-2.30795	0.0504309	-0.485508	-0.398776		0.0595921	0.119801	-0.139762	-0.0292704	1.93297	-0.047856	-1.96154	-0.14842	-0.524729	-0.398776		0.138999	-0.0953102	0.126294	-0.0284379
	IFNA1	0.00873368	-1.51523	-0.139762	-0.0194181	0.076961	-0.0676586	-0.566853	0.180884	-0.524729	1.16938		-0.0727594	-1.45299	-0.0175443	0.046957	0.198851	-0.0676586	-0.501256	0.289835	-0.45707	0		-0.131028	-1.60141	-0.139762	0.0190482	0.0198026	0.0633696	-0.517257	0.0504309	-0.485508	0		0.0595921	-0.980829	-0.139762	-0.0292704	0	-0.047856	-0.578217	-0.14842	-0.524729	0		0.138999	-1.2721	0.126294	-0.0284379
		Log2(Treated/Ctrl)
		-4															4
		-4	-3.5	-3	-2.5	-2	-1.5	-1	-0.5	0	0.5	1	1.5	2	2.5	3	3.5	4
[truncated: 3 more columns]

[truncated: 11 more sheets: 11_TLR genes, 12_transcriptional regulation, 13-HLA-Class I_II_APM genes, 14-Complement related genes, 15-chemokines and receptors, 16-Survival_apoptosis, 17-Intracellular signaling, 18-Immune suppression, 19-TGF beta pathway, 20-Growth factors and receptors, 21-Unclassified]
